# Supplementary material for: 16S rRNA and metabolomics reveal the key microbes and key metabolites that regulate diarrhea in Holstein male calves
Source: Front Microbiol. 2025 Jan 15;15:1521719. doi: 10.3389/fmicb.2024.1521719 (PMC11778179; doi:10.3389/fmicb.2024.1521719)
Supplement: Supplementary file 3 [file Data_Sheet_2.xls]

## Sheet: Table S4
Supplementary Table S4. Information of all studied diarrhea dairy male calves in the present study
Sample_number	Sample_ID	Birth weight	Age(days)	Body temperature(°C)	Fecal score	Morphological description	Group
GX5480	H01	42	2	39.4	0	Nomal feces	H1W
GX5554	H02	43	4	39.2	0	Nomal feces	H1W
GX5534	H03	44	6	39.3	0	Nomal feces	H1W
GS5727	H04	48	3	39.2	0	Nomal feces	H1W
GX5732	H05	36.5	7	39.4	0	Nomal feces	H1W
GX5736	H06	45.2	7	39.3	0	Nomal feces	H1W
GX5438	H07	46	13	39.4	0	Nomal feces	H2W
GX5465	H08	44	12	39.1	0	Nomal feces	H2W
190666	H09	35	12	39.2	0	Nomal feces	H2W
GX5489	H10	32	11	39.2	0	Nomal feces	H2W
GX5509	H11	40.5	10	39.2	0	Nomal feces	H2W
GX5549	H12	42.3	12	39.4	0	Nomal feces	H2W
GX5429	H13	47	17	39.5	0	Nomal feces	H3W
GX5469	H14	32	17	39.1	0	Nomal feces	H3W
GX5497	H15	42	14	39	0	Nomal feces	H3W
GX5667	H16	38	18	39	0	Nomal feces	H3W
GX5639	H17	46.3	17	39.5	0	Nomal feces	H3W
GX5654	H18	43.1	15	38.8	0	Nomal feces	H3W
GX0529	H19	38	22	39.4	0	Nomal feces	H4W
GX0499	H20	43	26	39.1	0	Nomal feces	H4W
GX2457	H21	49	28	39.2	0	Nomal feces	H4W
GX0571	H22	36	28	39.5	0	Nomal feces	H4W
GX0629	H23	37.6	26	39.2	0	Nomal feces	H4W
GX0624	H24	40.5	27	39.3	0	Nomal feces	H4W
GX5483	D01	49.3	2	39.1	3	Water mushy stool	D1W
GX5556	D02	40.5	4	39.1	3	Water mushy stool	D1W
GX5533	D03	32.4	6	39.2	3	Water mushy stool	D1W
GX5724	D04	49.15	3	39	3	Water mushy stool	D1W
GX5735	D05	42.3	7	39.2	2	Mushy stool	D1W
GX5751	D06	37.5	7	39.2	2	Mushy stool	D1W
GX5439	D07	44	13	39.1	3	Water mushy stool	D2W
GX5463	D08	38	13	38.9	3	Water mushy stool	D2W
GX0229	D09	42	12	39.2	3	Water mushy stool	D2W
GX5467	D10	37	11	39.3	3	Water mushy stool	D2W
GX5508	D11	39.6	10	39.3	3	Water mushy stool	D2W
GX5551	D12	43	12	39.4	2	Mushy stool	D2W
GX5430	D13	36	17	39.1	3	Water mushy stool	D3W
GX5469	D14	46	17	39.2	3	Water mushy stool	D3W
GX5501	D15	50	15	39.6	3	Water mushy stool	D3W
GX5672	D16	41	18	39.3	3	Water mushy stool	D3W
GX5634	D17	38.6	17	39	3	Water mushy stool	D3W
GX5653	D18	43	15	39.2	3	Water mushy stool	D3W
GX0533	D19	31	22	39.4	2	Mushy stool	D4W
GX0500	D20	37	26	39.2	3	Water mushy stool	D4W
GX0456	D21	35	28	39.1	3	Water mushy stool	D4W
GX0575	D22	36	28	39.1	3	Water mushy stool	D4W
GX0633	D23	40	26	39.4	3	Water mushy stool	D4W
GX0621	D24	45	27	39.3	3	Water mushy stool	D4W

## Sheet: Table S5
Supplementary Table S5. Differential fecal metabolites in calves with D1W vs. H1W diarrhea.
ID	MS2_name	H01	H02	H03	H04	H05	H06	D01	D02	D03	D04	D05	D06	Pvalue	FDR	VIP
M377T235_POS	(-)-riboflavin	1.19988e+08	3.41558e+07	4.44636e+08	2.9093e+08	2.09692e+07	4.92366e+08	4.51137e+07	1.04073e+07	2.06169e+07	1.18177e+07	1.23678e+07	5.71879e+07	0.0340248	0.218759	2.57861
M429T50_2_NEG	(1-acetyloxy-3-hydroxy-6,8a-dimethyl-7-oxo-3-propan-2-yl-2,3a,4,8-tetrahydro-1h-azulen-4-yl) 4-hydroxybenzoate	1291833521	2.65701e+08	8.12753e+08	4.05357e+08	2.84975e+08	8.62175e+08	6.00541e+07	2.22519e+08	2.7935e+08	5.03488e+07	3.45834e+08	2.14743e+08	0.0241234	0.197085	4.32424
M495T423_NEG	(1s,4as,7s,7as)-7-hydroxy-7-methyl-1-[(2s,3r,4s,5s,6r)-3,4,5-trihydroxy-6-[(4-hydroxybenzoyl)oxymethyl]oxan-2-yl]oxy-4a,5,6,7a-tetrahydro-1h-cyclopenta[c]pyran-4-carboxylic acid	2.47844e+07	1.13045e+08	6.74436e+08	618506349	7.52916e+07	5.87227e+08	7.28073e+07	2.92909e+07	1.22721e+07	9.37261e+06	7.81308e+07	9.44619e+07	0.0390656	0.227174	2.96719
M102T348_NEG	(S)-2-aminobutyric acid	2.50044e+08	8.61943e+07	5.78268e+07	8.35543e+07	8.42913e+06	2.77174e+08	1.57792e+07	3.63349e+06	1.77499e+07	1.48556e+07	2.98633e+07	2.25199e+07	0.0345079	0.218759	2.01937
M329T49_NEG	(z)-9,12,13-trihydroxyoctadec-15-enoic acid	1.65861e+08	1.83971e+08	2.37506e+08	2.27608e+08	1.80352e+08	1.02708e+08	1191309027	5.32095e+08	7.13172e+08	5.44284e+08	7.67318e+08	4.75427e+08	0.000778317	0.0668927	4.93996
M496T221_4_POS	.alpha.-ergocryptine	3857363463	3676702468	3013438244	3250174996	1331708409	5.32325e+08	2790129336	4756654588	4789741095	4058925172	6365551053	4145871625	0.0284118	0.207594	7.22168
M381T90_POS	1,24-dihydroxyvitamin d3	9.05945e+08	1602436728	2.89114e+08	6.78541e+08	7.20778e+08	7.79494e+08	6.48674e+07	2.353e+08	9.2696e+07	682832761	2.62265e+08	1.85358e+08	0.0158928	0.173693	4.64253
M787T170_POS	1,2-dioleoyl-sn-glycero-3-phosphatidylcholine	488962234	3.00799e+08	8.71306e+08	4.24469e+08	2.05549e+08	2.7102e+08	1595896367	1377249717	1365114377	1113338171	1579286472	1145776943	2.79e-05	0.0235713	6.6666
M481T26_1_NEG	1.alpha.-methyl-5.alpha.-androstan-3.alpha.,17.beta.-diol glucuronide	2858374726	5532246140	3551649958	2949638661	1361150552	4071888657	8.78426e+07	1390240177	3.73512e+08	1932625008	6.68614e+08	1479364707	0.00376756	0.110688	9.98462
M432T166_NEG	11,12-dihydroxy-13-methoxy-4,5,8-trimethyl-3-(2-methylpropyl)-1h,2h,3h,4h,6ah,9h,10h,11h,12h,13h,14h,15h,15bh-cycloundeca[e]isoindole-1,15-dione	3.40992e+06	2.07861e+08	2.05061e+08	142691913	1.03581e+08	2.67437e+08	333188	121976	4.24182e+06	1.28903e+07	2.95327e+07	3.15737e+07	0.00428651	0.115134	2.23233
M343T329_NEG	13-hydroxy-4z,7z,10z,14e,16z,19z-docosahexaenoic acid	1.28274e+08	6.66638e+07	4.41276e+08	7.08132e+08	1.29483e+08	1.06293e+08	1.17779e+06	9.07788e+06	1.04204e+07	1.09497e+07	5.59736e+06	4.45097e+07	0.038592	0.226446	2.78967
M299T58_2_NEG	13-hydroxy-9z,11e-octadecadienoic acid	5851808723	9652013612	2627917539	8151592597	16292947409	9506907692	35922176319	12323775911	23845470024	15386750286	13883162660	36770248563	0.0149428	0.170799	24.5616
M387T283_2_NEG	15(r)-17-phenyltrinorprostaglandin f2.alpha.	130623867	1.07244e+08	3.86478e+07	2.20063e+08	1.86595e+07	1.51724e+08	1.70888e+06	1.69435e+06	1.0536e+06	2.95237e+06	3.13117e+06	9.3486e+06	0.00531005	0.124281	2.07839
M747T173_2_POS	1-hexadecyl-2-(9z-octadecenoyl)-sn-glycero-3-phosphocholine	2.67558e+08	5.43515e+08	5.70722e+08	2.84747e+08	352553442	4.1886e+08	4.28302e+07	1.01562e+08	123927454	8.18164e+07	3.26421e+07	1.04937e+08	0.000141487	0.0446713	3.75167
M482T225_1_POS	1-hexadecyl-sn-glycero-3-phosphocholine	236241181	1.69079e+08	4.38755e+08	1.4678e+08	2.55468e+08	6.53188e+07	2.08681e+07	1.10077e+08	5.02008e+07	4.691e+07	9.55756e+07	1.12046e+08	0.0228208	0.193178	2.29621
M393T99_2_POS	1h-pyrano[3',4':6,7]indolizino[1,2-b]quinoline-3,14(4h,12h)-dione, 4,11-diethyl-4,9-dihydroxy-, (4s)-	6.38338e+08	4.38988e+08	1488063797	1499815216	4.24461e+08	1754784952	3.48175e+07	1.89957e+08	8.61618e+07	1.90841e+08	6.51677e+07	2.62543e+08	0.00468629	0.119382	5.97695
M642T143_POS	1-linoleoyl-2-oleoyl-rac-glycerol	1.98097e+08	2.29225e+08	289976199	1.51823e+08	2.98778e+08	1.32137e+08	1.65593e+06	2.02818e+07	9.05404e+06	1.2291e+08	2.07863e+07	2.17811e+08	0.00757461	0.141153	2.45165
M733T174_1_POS	1-oleoyl-2-myristoyl-sn-glycero-3-phosphocholine	4.70822e+08	2.23648e+08	295011033	4.21724e+08	1.03236e+08	1.30794e+08	1053475306	5.03217e+08	8.79394e+08	5.5895e+08	9.76102e+08	5.64446e+08	0.00198918	0.0876986	4.47907
M480T223_POS	1-oleoyl-sn-glycero-3-phosphoethanolamine	1.80321e+07	3.13305e+07	1.01901e+08	6.05751e+07	3.43605e+07	2.21978e+07	3.52224e+08	6.89272e+07	2.10257e+08	2.89871e+07	2.98572e+08	7.24482e+07	0.048318	0.243728	2.13968
M471T184_2_NEG	1-o-octyl-2-o-(n-methylcarbamoyl)-sn-glyceryl-3-phosphorylcholine	2328313241	13889977170	4397403679	11074926947	1172827833	7366609252	2.16695e+07	2.83897e+08	5.54631e+07	2258156741	5.86022e+07	2811576514	0.0209597	0.188266	13.518
M817T166_NEG	1-palmitoyl-2-arachidonoyl-sn-glycero-3-phosphocholine	6.34803e+06	1.04805e+07	1.57754e+07	1.31886e+07	7.84652e+06	1.82326e+06	115150151	1.03989e+08	1.70083e+08	1.17029e+08	2.01163e+08	6.72195e+07	0.000124565	0.0446713	2.35073
M759T172_1_POS	1-palmitoyl-2-linoleoyl-sn-glycero-3-phosphocholine	3.26431e+08	3.35487e+08	6.53574e+08	4.32984e+08	1.66958e+08	2.07944e+08	1779472234	1115671231	1345287886	9.88304e+08	2219436183	6.89846e+08	0.00185051	0.0876986	6.50211
M578T61_POS	1-palmitoyl-2-oleoyl-sn-glycerol	2.02093e+07	3.91138e+07	2.23825e+07	4.45262e+07	4.25917e+07	3.13578e+07	2.0348e+08	4.87635e+07	2.15874e+08	2.25805e+07	1.39437e+08	195390443	0.0126556	0.161564	2.14203
M992T221_POS	1-palmitoyl-sn-glycero-3-phosphocholine	3.28657e+08	2.99657e+08	207897842	2.27578e+08	3.04743e+07	3.87499e+06	1.54754e+08	6.96885e+08	6.34858e+08	3.89986e+08	9.15134e+08	5.30261e+08	0.0118255	0.158561	3.48187
M391T57_2_NEG	1-piperazineacetic acid, 4-(phenylmethyl)-, 2-[[2-hydroxy-3-(2-propen-1-yl)phenyl]methylene]hydrazide	2.66991e+08	1.44071e+08	8.5966e+07	1.56738e+08	4.82898e+07	2.75879e+07	620858783	479369063	1593846645	4.13053e+08	1367188667	8.09529e+08	0.00384932	0.11154	5.62333
M811T165_POS	1-stearoyl-2-arachidonyl-sn-glycero-3-phosphocholine	2.74197e+08	77779226	1.7819e+08	1.47001e+08	4.70707e+07	5.25991e+07	6.59723e+08	6.97397e+08	8.41546e+08	6.2099e+08	1511272131	4.44706e+08	0.00166869	0.0849356	5.12045
M546T218_POS	1-stearoyl-2-hydroxy-sn-glycero-3-phosphocholine	5.45352e+08	3.89381e+08	354054637	3.61194e+08	5.34355e+08	2.22661e+08	2.20465e+08	3.12792e+08	2.28269e+08	3.84422e+08	1.51118e+08	2.96992e+08	0.0476993	0.242688	2.20779
M480T222_3_NEG	1-stearoyl-2-hydroxy-sn-glycero-3-phosphoethanolamine	6.40652e+08	3.83624e+08	8.64976e+08	575106546	3.64064e+08	8.6947e+07	1118740601	1834889803	1523137377	1096190223	2425679882	1355329555	0.000991769	0.0728904	6.60935
M789T134_POS	1-Stearoyl-2-oleoyl-sn-glycerol 3-phosphocholine (SOPC)	8.11066e+06	3.27971e+06	1.70357e+07	1.39198e+07	3.68215e+06	4.60079e+06	1.30982e+08	4.63393e+07	2.06084e+08	7.41479e+07	3.74046e+08	4.33536e+07	0.0250054	0.199183	2.14572
M195T440_NEG	2,4,6-trichlorophenol	9.98009e+07	1156722128	2.40381e+08	5.83173e+08	2.09147e+08	1150274384	3.70068e+07	7.25233e+07	7.34409e+07	1.19106e+08	1.98645e+08	2.17818e+08	0.0443877	0.237945	3.46033
M767T165_NEG	2-arachidonoyl-1-stearoyl-sn-glycero-3-phosphoethanolamine	2.47421e+07	1.07302e+07	1.27539e+07	1.49267e+07	7.11756e+06	1.99213e+06	3.31639e+08	8.3756e+07	1.85988e+08	7.59708e+07	2.28386e+08	3.16729e+07	0.0110052	0.155692	2.41859
M101T407_1_POS	2-hydroxy-2-methylbutyric acid	7.81809e+08	4.06429e+08	7.89172e+08	4.07602e+08	2.93769e+08	4.16963e+08	3.77631e+06	245003199	3.06536e+07	1.8888e+08	2.91424e+08	3.14152e+08	0.00826381	0.143538	3.94059
M576T32_POS	2-linoleoyl-1-palmitoyl-sn-glycero-3-phosphoethanolamine	1.95721e+07	2.81496e+07	5.83511e+07	7.17239e+07	2.95537e+07	4.0592e+07	228543106	5.07497e+07	2.33233e+08	3.7361e+07	1.99027e+08	1.7961e+08	0.0117088	0.157803	2.20984
M783T174_POS	2-oleoyl-1-palmitoyl-sn-glycero-3-phosphocholine	4.37419e+08	1.48106e+08	2.25299e+08	179662592	1.08299e+08	8.60823e+07	1.09307e+08	7.06656e+08	1212066621	8.25875e+08	2.28989e+08	5.21771e+08	0.042443	0.233244	3.36422
M280T27_NEG	2'-o-methyladenosine	2.74011e+08	1305464720	1821612944	1760961605	1296944943	1675250395	4.451e+07	6.3569e+08	148337212	1166534125	2.43752e+08	1.63782e+08	0.00854222	0.144745	5.93828
M100T407_POS	2-piperidone	4.29366e+08	2.26212e+08	4.34761e+08	219856730	1.6353e+08	2.31203e+08	3.76213e+06	1.35064e+08	1.65293e+07	1.03861e+08	158036349	1.70641e+08	0.0077673	0.141894	2.93256
M100T59_2_POS	2-pyrrolidinone, 1-methyl-	6.44027e+07	7069198502	6878156658	5420173937	2828936484	5448920197	2.66099e+07	8.31279e+08	3.04885e+07	2787150401	8.52573e+08	3722458784	0.028291	0.207211	9.94673
M127T143_NEG	2-thiophenecarboxylic acid	1222419622	1159892075	1047726892	1141422433	1124950027	1243520926	1340357472	1347181213	1293166507	1287485298	1307749838	1227901764	0.00166725	0.0849356	2.42343
M277T97_NEG	3-amino-1-propanesulfonic acid	1.72896e+07	1.57849e+08	3.77416e+08	3.93707e+08	4.38732e+08	399203451	2.85677e+07	1.43747e+08	7.36334e+06	5.81451e+07	3.61316e+07	2.53948e+08	0.0245872	0.197628	2.45816
M299T301_NEG	3'-hydroxymelanettin	2.21417e+08	2.87638e+08	3.22195e+08	2.27399e+08	5.53888e+08	293992844	4.82584e+08	4.96009e+08	4.29735e+08	6.05283e+08	3.6546e+08	4.0157e+08	0.0374978	0.223992	2.18454
M87T256_POS	3-methyl-2-buten-1-ol	1.93766e+07	6.44784e+07	1.64858e+08	2.07969e+08	2.92732e+08	1.57776e+08	5.97259e+06	1.52691e+07	1.94e+07	1.60494e+07	5.70068e+06	1.33307e+07	0.00627697	0.130588	2.15249
M521T28_NEG	4-({5-[5-hydroxy-3-({[(2z)-2-methylbut-2-enoyl]oxy}methyl)pentyl]-8a-(hydroxymethyl)-5,6-dimethyl-3,4,4a,5,6,7,8,8a-octahydronaphthalen-1-yl}methoxy)-4-oxobutanoic acid	1.92143e+07	2.86612e+08	3.36853e+08	1.08353e+08	2.08147e+08	2.70994e+08	6.55452e+06	5.13938e+07	1.07311e+07	8.09596e+07	2.15747e+07	9.94718e+07	0.0112278	0.155759	2.29783
M377T23_NEG	4.alpha.-mannobiose	223366429	4.91909e+07	1010327929	5.83781e+08	2.8785e+08	1096368388	4.03291e+07	6.63099e+07	1.80047e+08	1.4993e+07	1.02139e+08	1.99629e+08	0.0337115	0.218759	3.68718
M118T407_2_POS	5-aminovaleric acid	1922527147	1019010324	1938094461	1014126635	7.31323e+08	1035996371	4.47386e+07	6.23161e+08	8.51413e+07	4.71999e+08	7.22815e+08	7.77185e+08	0.00789443	0.142299	6.16146
M467T83_1_NEG	5-methoxytryptophan	1.10953e+08	3264611286	3.82067e+08	1304778910	4.65528e+08	2405192316	2.41065e+06	5.5997e+07	4.95686e+07	2.82196e+08	4.68738e+07	2.96054e+08	0.0437255	0.236012	5.59887
M417T91_POS	7.alpha.,12.alpha.-dihydroxycholest-4-en-3-one	3.33689e+08	585262038	1.20062e+08	2.4112e+08	2.75122e+08	2.84966e+08	3.11855e+07	9.04116e+07	5.24535e+07	2.43525e+08	1.10656e+08	1.14075e+08	0.0170802	0.177404	2.71648
M186T184_NEG	7-keto-8-aminopelargonic acid	5.76497e+08	1972539211	3.8121e+07	1374528644	5.28391e+07	2931884177	1.05887e+07	1.16426e+06	2.61956e+07	1.64517e+06	2.02562e+07	1.34316e+08	0.0383336	0.225809	5.67728
M166T207_POS	7-methylguanine	1.13154e+08	2.62783e+08	8.34311e+08	8.69768e+08	6.8815e+08	1163641125	8.69128e+07	2.81036e+08	1.56604e+08	1.97045e+08	9.21909e+07	2.27398e+08	0.0152206	0.172099	3.92158
M194T86_2_NEG	Acridone	1248950627	3086636580	5.79333e+08	3658062284	700064992	2688422482	2.54203e+08	9.59789e+07	1.90177e+07	4.17874e+08	6.26645e+07	3.55182e+08	0.00790992	0.142299	7.98214
M114T377_POS	Agmatine	1.71024e+08	400643763	1.07053e+08	1.13127e+08	8.29064e+07	3.32221e+08	2.50653e+07	1.47981e+07	5.33219e+06	7.18406e+07	1.8125e+07	6.40843e+07	0.0127295	0.161982	2.4302
M322T54_NEG	Anorexigenic peptide	1.97309e+06	3.1752e+08	7.14989e+08	6.07589e+08	2.87392e+08	1175690541	2.95337e+07	4.70653e+07	2.4575e+07	2.03338e+06	21260018	8.23576e+07	0.0163314	0.175325	3.90227
M303T50_2_NEG	Arachidonic acid (peroxide free)	7.99711e+08	587185093	7.23941e+08	9.44669e+08	5.20887e+08	3.72566e+08	3029215949	2327481129	1787154591	1771010807	2393342467	1471938037	0.000132982	0.0446713	8.30459
M378T301_NEG	Atalaphylline	9.49185e+06	274749274	4.02263e+08	3.9236e+08	2.22846e+07	2.20996e+08	4.55643e+06	8.4981e+06	7.07745e+06	2.85385e+06	4.86471e+07	2.937e+07	0.0167084	0.176493	2.56595
M314T193_NEG	Aurantio-obtusin	8.807e+06	4.30723e+08	1.02402e+08	3.66903e+08	1.62174e+08	1.8651e+08	654366	1.84937e+06	2.17882e+06	2.90222e+06	4.55285e+06	2.63273e+07	0.0112158	0.155759	2.50053
M409T40_1_POS	Beclomethasone	6.99089e+07	2.42117e+07	1.61781e+08	8.11761e+07	1.16345e+08	3.4099e+07	3.14976e+08	4.14193e+08	2.53809e+08	2.75525e+08	2.94441e+08	8.06203e+07	0.00307984	0.101491	2.76409
M139T195_NEG	Benzoic acid, 2-fluoro-	6.80373e+07	4.56405e+07	5.16331e+08	5.00915e+08	3.10155e+07	4.01434e+08	4.09747e+06	6.24289e+07	8.76112e+06	3.15884e+07	4.85662e+06	5.47782e+07	0.0373367	0.223537	2.69897
M87T120_NEG	Butanoic acid	5346202737	8656232351	1601409457	5551369128	8316192442	8745538589	1830318521	2761066445	1149479428	2300649607	1982422043	6316218239	0.023572	0.195924	10.5774
M399T91_2_POS	Calcitriol	5.02266e+08	8.90181e+08	1.85052e+08	3.93464e+08	5.14292e+08	4.37434e+08	4.62131e+07	1.27284e+08	8.46709e+07	3.89121e+08	3.30672e+08	1.5947e+08	0.0219812	0.1909	3.27774
M171T54_NEG	Capric acid	4.00992e+08	2.27114e+08	7.71974e+07	3.03961e+08	2.50859e+08	3.35996e+08	2116178721	2.43275e+08	1275465120	2.06458e+08	1350911382	1376315669	0.0217754	0.190288	5.72972
M339T52_2_POS	Chenodeoxycholate	2.36384e+07	5.14414e+07	8.55774e+07	9.69111e+07	4.53027e+07	4.20899e+07	2.43731e+08	1.88214e+08	1.63982e+08	2.15536e+08	1.89639e+08	1.56713e+08	1.57e-05	0.0169541	2.5641
M465T25_2_NEG	Cholesteryl sulfate	7413063567	14840996675	16035730219	14095296646	10429266357	13595907535	1267582022	5494654662	2302677572	8261394494	3790015737	10114777281	0.00289342	0.100681	17.5826
M104T301_2_POS	Choline	2786480239	1120867193	2938614694	1816392213	1247152799	6.30665e+08	5416666315	2525798193	4677830220	4721959881	2686859752	4748518937	0.00352245	0.107222	9.51488
M281T50_NEG	Cis-vaccenic acid	1797836678	2263452831	3522118872	3034262816	6359315831	3092890713	16612073027	6956515283	17847995954	5250491867	19046562949	13813209819	0.00246057	0.0928499	21.4305
M317T250_2_NEG	Coenzyme q2	5.52032e+07	3.76708e+08	2.6853e+08	3.6725e+08	2.02223e+08	642202107	812133	5.62409e+07	1.48026e+06	1.17814e+08	3.40228e+07	1.92372e+08	0.0155426	0.17284	2.85584
M263T113_NEG	Dapsone hydroxylamine	1.3184e+07	1.08693e+08	2.88015e+08	2.76873e+08	308845502	3.98421e+08	2.10911e+07	6.46492e+07	5.38518e+06	2.79489e+07	2.53355e+07	2.14114e+08	0.0265589	0.202973	2.22616
M325T233_NEG	Derrustone	8.09807e+07	3.43443e+08	1.74393e+08	7.27529e+07	2.08046e+07	9.87905e+07	5.35846e+08	1.46212e+08	442592559	3.98229e+08	7.01307e+08	1.35543e+08	0.0280477	0.207091	2.96583
M259T285_NEG	D-glucose 6-phosphate	2.91905e+08	2.4531e+08	1.17058e+08	2.96926e+08	5.83936e+07	2.29338e+08	1.91127e+07	4.04032e+07	6.78975e+07	1.08186e+08	6.29966e+07	1.14333e+08	0.00896256	0.145997	2.41182
M259T271_1_NEG	D-mannose 6-phosphate	1.57259e+08	2.42505e+08	8.72102e+07	2.49626e+08	4.59244e+07	2.21016e+08	6.4765e+06	2.68669e+07	4.34051e+07	8.07675e+07	3.83623e+07	7.18897e+07	0.00748365	0.140249	2.18527
M199T52_NEG	Dodecanoic acid	653786663	4.01064e+08	2.60321e+08	4.15736e+08	5.68809e+08	4.52663e+08	1630397206	5.99373e+08	9.44392e+08	4.34449e+08	9.2001e+08	8.78888e+08	0.0313166	0.213516	4.09693
M309T49_NEG	Eicosenoic acid	4.2512e+07	9.74666e+07	8.64345e+07	6.65e+07	1.94411e+08	107827325	4.44171e+08	1.64276e+08	4.83456e+08	1.25669e+08	534395534	3.49951e+08	0.00624104	0.130412	3.3449
M463T119_NEG	Estriol 16.alpha.-(.beta.-D-glucuronide)	140826276	5.65582e+07	8.84037e+07	1.66684e+08	2.69612e+07	1.32859e+08	466661	1.64285e+07	4.18543e+06	1.45195e+07	1.1177e+07	1.03178e+07	0.00189174	0.0876986	2.05694
M463T183_NEG	Estriol 16alpha-(beta-d-glucuronide)	6.14691e+07	3.20134e+08	3.23046e+08	6.65063e+08	1.46444e+08	408123768	5.06027e+06	9.6326e+07	4.77257e+07	196837764	4.00372e+07	9.54703e+07	0.0241297	0.197085	2.78125
M385T51_NEG	Eudesmin	7.48597e+08	2.38773e+08	7.57789e+08	1.7059e+08	7.77517e+07	2.0683e+08	3.4083e+06	6.21229e+07	3.55051e+07	1.31513e+08	5.36978e+07	1.17149e+08	0.0385372	0.226415	3.47286
M453T47_NEG	Fahfa 28:0	8.00985e+06	3.31361e+07	3.77926e+07	1.69117e+07	3.73267e+07	5.44989e+07	7.02231e+08	4.92799e+06	3.45711e+08	1.73008e+06	4.28157e+08	3.6427e+08	0.0304138	0.212181	3.28577
M322T334_NEG	Flutolanil	4.62602e+06	1.96492e+08	3.11233e+08	496646222	1.90267e+07	4.92217e+08	2.76335e+06	5.72395e+06	2.64221e+06	1.47143e+07	1.66729e+07	2.28834e+07	0.0218894	0.19061	2.75503
M434T423_2_POS	Fluvastatin	3.36138e+07	1.08825e+08	1394235518	9.54987e+08	1.32758e+08	936074163	27032.1	4.51025e+07	8.57222e+06	11262090	4.8294e+07	1.32069e+08	0.0408093	0.230188	4.0742
M461T65_NEG	Forsythoside e	4.53734e+08	6.84396e+08	6.81171e+08	9.7914e+08	4.88841e+08	9.4536e+08	2.41242e+07	5.1936e+08	1.16326e+08	5.85876e+08	1.24035e+08	116845810	0.00635069	0.131426	4.30238
M604T40_POS	Glycerol trioleate	2.12954e+07	1.70103e+07	2.46206e+07	7.0296e+07	103879509	7.67872e+07	3.32599e+08	5.58487e+07	4.74864e+08	4.75802e+07	377195424	3.39208e+08	0.0142829	0.168087	3.03846
M75T308_NEG	Glycolate	2.07916e+08	7.81197e+08	1.44672e+08	2.26291e+08	5.32366e+07	4.35229e+08	2.6326e+07	2.10552e+07	4.35812e+07	2.80657e+07	2.30649e+07	6.32633e+07	0.0295369	0.210402	2.84782
M214T410_POS	Guanabenz	2.0555e+07	1.07196e+07	5.63611e+06	1.46426e+07	2.45118e+07	7.64548e+07	2.57876e+08	3.5854e+07	2.57531e+08	1.04186e+08	1.45951e+08	7.59363e+07	0.0122754	0.159835	2.24531
M166T178_NEG	Guanidinoethyl sulfonate	2176711153	2103122806	1744240056	2892155531	7.27406e+08	4680066933	2.33372e+08	6.48315e+08	7.17974e+08	4.04586e+08	5.17458e+08	1365937464	0.0116623	0.15731	7.94925
M348T269_NEG	His-Gly-His	1.94685e+07	1.01148e+08	3.62357e+08	3.43292e+08	3.3353e+07	1.54515e+08	564837	1.09472e+07	1.68196e+06	2.11386e+06	1.75719e+07	9.35335e+06	0.0250435	0.199211	2.27667
M241T97_2_NEG	His-ser	4.96899e+07	7.77594e+08	1682842214	1984861868	1629527705	1502157148	3.30926e+07	629584898	1.02023e+07	2.40889e+08	1.36222e+08	7.97322e+08	0.0138416	0.166828	5.51099
M227T113_2_NEG	Ile-Pro	2.76036e+07	4.14279e+08	8.78055e+08	1398446295	9.64157e+08	1091356303	2.47554e+07	2.47411e+08	6.52219e+06	1.10886e+08	7.54455e+07	4.80916e+08	0.01402	0.167985	4.47869
M419T56_3_NEG	Jasmonic acid	4.1625e+08	2.98288e+08	3.13691e+08	5.20451e+08	1.9103e+08	5.69495e+07	9.9145e+08	8.10928e+08	1352851266	5.68983e+08	2252915624	3824817594	0.0244217	0.19728	6.6671
M455T60_2_NEG	L-alaninamide, n-[2-[2-(hydroxyamino)-2-oxoethyl]-4-methyl-1-oxopentyl]-3-(2-naphthalenyl)-l-alanyl-	2778052955	2762062230	1.74577e+08	3883228536	5.68701e+08	1390484284	835599	72332834	1.07577e+08	1340165300	3.37503e+07	8.63553e+08	0.0370253	0.222984	7.37945
M356T235_POS	Lappaconitine	1.07135e+07	9.1268e+07	2.47898e+08	2.38507e+08	2.10761e+08	2.65284e+08	6.65485e+06	4.15776e+07	1.61318e+07	1.1099e+07	4.96189e+07	1.35223e+08	0.016007	0.17416	2.03609
M342T165_NEG	Lauroyl-l-carnitine	3.3417e+06	1286078214	6.16751e+08	721126855	3.15198e+08	1208106916	2.23852e+06	7.21753e+06	629516	7.94064e+07	2.88365e+06	2.64897e+08	0.0124573	0.16121	4.44429
M258T433_2_POS	Levorphanol	1.38279e+08	5.06684e+08	3.28525e+08	3.79642e+08	1.90085e+08	348853213	64265.8	271345	156900	1.11133e+06	359713	2.0194e+06	0.000179039	0.0446713	3.64291
M522T212_2_POS	Lpc 18:1	4.87222e+08	2.02521e+08	1.81778e+08	3.07623e+08	6.77452e+07	2.76858e+07	5.21073e+08	1020558160	2066264459	6.06534e+08	2407134205	1058361594	0.0082691	0.143538	6.29053
M95T113_NEG	Methylphosphonic acid	9.48515e+07	2.1403e+08	4.6993e+08	3.75816e+08	547780958	2.74262e+08	4.93789e+07	4.50831e+07	7.29749e+07	6.89004e+07	1.46047e+08	2.14909e+08	0.0109936	0.155692	2.73332
M437T37_POS	Met-Met-Arg	4.65429e+07	1.58287e+07	113547894	5.33373e+07	9.12978e+07	2.5877e+07	2.32198e+08	2.96927e+08	1.93906e+08	2.02149e+08	1.87991e+08	4.98513e+07	0.00395598	0.11241	2.33264
M397T29_NEG	Mitragynine	1443906441	7.69818e+08	1056486585	5.15016e+08	1.0627e+08	3.59757e+08	9.58766e+06	3.0669e+08	3.30388e+07	250664894	2.8766e+07	8.49947e+07	0.0167526	0.176511	5.06009
M339T32_POS	Monoelaidin	2.7847e+07	2.62967e+07	2.95583e+07	3.40926e+07	3.07648e+07	3.37657e+07	3.81967e+08	2.42539e+07	1.59185e+08	2.64324e+07	2.78597e+08	4.38675e+08	0.0266745	0.203165	2.63444
M88T86_POS	Morpholine	2.75483e+07	8.91767e+07	2.32082e+08	1.64364e+08	297117173	1.91226e+08	2.01405e+07	3.67205e+07	5.29115e+07	4.36127e+07	3.57134e+07	2.71969e+07	0.00837489	0.143949	2.06684
M244T276_2_POS	N-acetyl-d-galactosamine	4.40554e+08	8.8522e+08	2180932258	2276119941	1777147774	1197052828	3.35626e+07	4.79919e+08	2.35145e+07	7.0562e+08	3.09266e+08	7.06132e+08	0.00779015	0.142139	6.30785
M300T278_3_NEG	N-Acetyl-D-Glucosamine 6-Phosphate	1.37216e+07	5364747791	527414000	4017532304	6.68504e+08	2308332094	4.30885e+06	3.57174e+07	1.27881e+07	1.40495e+07	1.74427e+07	6.14725e+08	0.0445707	0.238276	7.19036
M222T60_1_NEG	N-Acetyl-L-tyrosine	1.12981e+08	1.79885e+08	8.91806e+07	3.77184e+08	5.52595e+07	2.36305e+08	4.25942e+07	2.13141e+07	1.85814e+07	3.66883e+07	7.70779e+07	8.8862e+07	0.0282991	0.207211	2.01089
M292T322_NEG	N-acetylmuramic acid	7.12229e+07	2.61656e+08	9.61291e+07	1.52987e+08	9.70924e+07	1.43791e+08	3.25141e+06	1.36315e+07	1.03156e+07	2.18408e+07	1.03625e+07	2.93399e+07	0.00147079	0.0824687	2.16965
M308T312_NEG	N-acetylneuraminic acid	3.48957e+07	2.49562e+08	4.88397e+08	3.46778e+08	7.37891e+07	2.30875e+08	4.2947e+06	2.51922e+07	3.75435e+07	8.24213e+06	8.38148e+07	8.77659e+07	0.0194951	0.185829	2.5107
M131T377_2_POS	N-acetylputrescine	4.38999e+08	1038380821	2.78356e+08	2.8996e+08	2.10596e+08	8.61226e+08	6.47525e+07	3.57433e+07	1.32529e+07	1.84765e+08	4.55412e+07	163446063	0.0130009	0.163845	3.90532
M147T41_NEG	Nitric acid	1.7018e+07	4.62969e+06	2.06643e+07	1.077e+07	5.02847e+07	4.10207e+06	3.11513e+08	1.81017e+08	3.34808e+08	6.98576e+07	2.58754e+08	1.56617e+07	0.00801973	0.142963	2.77388
M196T177_NEG	Norvaline, 5-phosphono-	8.2104e+08	5.41666e+08	1.20636e+08	1057918284	5.59224e+07	8.38812e+08	2.03828e+06	8.74158e+07	1.15952e+08	7.90601e+07	9.50855e+06	1.06316e+08	0.0133056	0.164514	4.3999
M143T61_NEG	Octanoic acid	1.03906e+08	1.24498e+07	2.81248e+07	4.80655e+07	2.5194e+07	3.40812e+07	8.33096e+08	2.47816e+07	9.23833e+08	3.32564e+07	9.73172e+08	3.58824e+08	0.0234912	0.195798	4.30057
M328T169_NEG	Octanoic acid, 4-[(1-oxo-7-phenylheptyl)amino]-, (4r)-	9.88732e+06	2855184956	2.81195e+08	1485983855	5.24442e+08	3068699795	4.15826e+06	1.09627e+07	1.61596e+06	8.75612e+07	1.95502e+07	3.50737e+08	0.0395984	0.22769	5.82489
M281T105_NEG	Oleic acid	5.99558e+08	1166534939	6.48055e+08	5.82738e+08	1062172307	1093953624	3512566851	6.80638e+08	7600058554	7.59736e+08	8121705544	7491917895	0.0230354	0.193865	11.969
M297T31_POS	Oleic acid methyl ester	5.6565e+07	5.82395e+08	1.46428e+08	464357698	6.33161e+08	759508276	6.72498e+06	1.82695e+08	1.26843e+07	4.1334e+07	2.00943e+07	1.32113e+08	0.0101111	0.153042	3.39015
M218T170_NEG	O-succinyl-l-homoserine	4.91868e+08	9.71979e+08	2.45601e+06	3.85397e+08	3.06168e+07	1377785947	1.89016e+07	113688	2.73352e+07	1.77744e+06	1.67746e+07	6.84958e+07	0.0401424	0.228396	3.93505
M255T52_4_NEG	Palmitic acid	4360510523	4013619363	4111875051	4210359966	4586854192	3323625800	7767005129	5778819648	8504199378	4839347253	5381598586	14380638832	0.0300309	0.211549	11.4745
M234T77_NEG	Pamidronic acid	1.70851e+07	6.02864e+07	3.03713e+08	2.41145e+08	1.11852e+08	6.19257e+08	1.90785e+06	2.74882e+07	5.95984e+06	25585678	3.83155e+07	2.30868e+07	0.0469178	0.242222	2.41477
M218T290_2_NEG	Pantothenate	7.57683e+08	2709189263	1641531855	2874031108	9.08479e+08	3805345641	4.03887e+08	1.48635e+08	5.48207e+08	2.27772e+08	3.29993e+08	5.45138e+08	0.0056231	0.127258	7.76493
M845T164_NEG	Pc(17:1/9-hode)	9.88683e+06	5.50238e+06	1.72438e+07	1.22353e+07	5.98337e+06	1.16282e+06	8.34293e+07	1.0371e+08	1.12825e+08	9.11227e+07	199265726	5.90068e+07	0.000525266	0.0598652	2.05403
M743T170_NEG	Pe 36:2	1.43392e+08	4.7586e+07	6.18939e+07	7.49848e+07	1.68264e+07	5.93335e+06	5.91049e+08	1.30927e+08	5.80472e+08	1.03769e+08	4.03696e+08	7.00555e+07	0.0300056	0.211549	3.0944
M298T231_NEG	Pectolinarigenin	1.13896e+08	4.82776e+08	3.36469e+08	8.42079e+07	5.55421e+07	1.16637e+08	9.87872e+08	2.97386e+08	9.22989e+08	7.1886e+08	1777692788	1.65209e+08	0.031773	0.214673	4.44739
M722T52_NEG	Pg 32:0	4.5733e+07	9.77989e+06	2.01885e+07	3.33332e+07	2.84443e+07	2.39439e+07	3.66753e+08	7.53049e+07	5.82411e+08	7.85878e+07	243278726	3.57168e+08	0.00895052	0.145997	3.34322
M719T51_NEG	Pg 32:1	5.33947e+06	2.44314e+07	1.20792e+07	1.62634e+07	1.3708e+07	4.46974e+06	2.87773e+08	2.99678e+07	1.62971e+08	2.43831e+07	1.21009e+08	7.63714e+07	0.0277641	0.206602	2.05639
M748T51_NEG	Pg 34:1	3.79925e+07	9.28934e+07	5.22427e+07	7.44236e+07	4.8567e+07	3.43143e+07	7.84215e+08	165187799	6.24954e+08	1.96809e+08	4.74824e+08	3.75132e+08	0.00331118	0.103949	4.19655
M774T51_NEG	Pg 36:2	1.30801e+07	4.29295e+07	5.68886e+07	9.50114e+07	2.93982e+07	2.79475e+07	5.02065e+08	2.83382e+08	2.16043e+08	365876285	1.94402e+08	2.39608e+06	0.0114213	0.156644	2.84212
M537T28_NEG	Phe(benzoyl)-leu-arg	7.6202e+07	4.36367e+08	3.98878e+08	111513671	100522392	1.76815e+08	1.70084e+06	5.82892e+07	9.79683e+06	1.44769e+08	1.74032e+07	4.78095e+07	0.0326505	0.217071	2.32197
M145T408_NEG	Phenylacetyl-l-glutamine	7.70905e+06	8.83008e+06	3.67217e+06	4.24858e+06	4.33065e+06	1.85668e+07	6.26666e+07	5.1434e+07	3.91354e+08	1.18726e+08	1.74996e+08	3.19577e+07	0.03872	0.22673	2.11116
M273T127_NEG	Phenylbenzimidazolesulfonic acid	2.46134e+08	8.11905e+07	9.60537e+07	256190140	5.60202e+07	2.52332e+07	101473	1.86491e+07	574239	3.77909e+07	3.21324e+06	1.79802e+07	0.0196291	0.186204	2.15726
M97T440_NEG	Phosphoric acid	4.44462e+08	2412521424	7.21746e+08	1440687894	6.7375e+08	2581765489	2.62937e+08	3.60262e+08	3.83553e+08	4.38971e+08	6.40725e+08	7.12297e+08	0.0396939	0.2277	4.9701
M283T297_NEG	Physcion	2.46805e+08	525590296	4.75832e+08	6.56899e+08	4.09793e+08	4.37357e+08	1.13913e+07	4.02527e+08	3.87469e+07	396641646	2.11412e+08	2.73964e+08	0.0236594	0.195953	2.90414
M415T207_1_NEG	Propanoic acid, 2-[[4-[2-[[(cyclohexylamino)carbonyl](4-cyclohexylbutyl)amino]ethyl]phenyl]thio]-2-methyl-	3.64818e+06	6.97756e+08	7.53337e+08	1.30195e+08	1.67149e+08	8.37617e+08	1.14612e+06	1.85429e+06	2.40661e+06	1.84828e+07	2.3538e+06	3.83032e+07	0.0192288	0.18486	3.60374
M73T178_NEG	Propionic acid	2.20549e+08	896089682	6.43937e+07	5.59002e+08	1.45721e+08	6.8775e+08	5.09878e+06	3.65625e+06	1.44107e+07	2.53031e+07	3.42177e+07	1.59681e+08	0.0187018	0.18247	3.47464
M87T109_NEG	Pyruvate	5.80409e+08	4364062293	7.04474e+07	5050767741	3.38756e+08	2773637268	2.07357e+07	1.19946e+08	3.67804e+07	346748680	6.14084e+07	6.1812e+07	0.0411291	0.230534	7.59739
M122T236_NEG	Quinolinate	2.48725e+08	7.0925e+08	1247874452	1498790594	8.45866e+08	1168800603	1.16969e+08	102088605	3.24871e+08	1.40584e+08	5.39408e+08	5.66183e+08	0.00886128	0.145869	4.68634
M391T98_NEG	Shanzhiside	1.79761e+08	7.2147e+07	2.01146e+08	2.76814e+08	7.01786e+07	2.28108e+08	1.54325e+07	4.29668e+07	4.77938e+07	3.0012e+07	2.58279e+07	7.39851e+07	0.00388542	0.111958	2.35121
M372T343_2_POS	Tamoxifen	5.47902e+06	7.89704e+07	3.9677e+08	2.35942e+08	1.18965e+08	1.98727e+08	5.61408e+06	4.14664e+07	9.1403e+06	8.05558e+06	3.10373e+07	9.93208e+07	0.0364169	0.221216	2.03028
M322T333_NEG	Tazarotenic acid	2.61284e+07	197818707	3.57646e+08	2.72957e+08	2.23528e+07	4.86037e+08	3.23672e+06	6.07391e+06	2.88679e+07	1.44308e+07	1.74669e+07	2.58076e+07	0.0185951	0.182091	2.60587
M181T78_POS	Theobromine	8.40995e+06	1.88578e+08	6.88646e+07	2.55557e+08	1.07302e+08	3.58251e+08	925793	1.27091e+07	5.84944e+06	5.18319e+07	5.83471e+06	2.56881e+07	0.019849	0.186711	2.12212
M494T222_POS	Tiamulin	8.01683e+07	2.71966e+07	8.12671e+07	4.59299e+07	1.6872e+07	1.12724e+07	1.99043e+08	1.79989e+08	5.54422e+08	5.92084e+07	7.248e+08	9.23934e+07	0.0439239	0.236507	2.87346
M877T41_POS	Triacylglycerol 16:0-18:1-18:1	6.31122e+07	4.40812e+07	2.60789e+07	2.4189e+08	1.15421e+08	1.69517e+08	5.07628e+08	1.03005e+08	7.26945e+08	6.92459e+07	5.99955e+08	5.02121e+08	0.023427	0.195705	3.51677
M243T176_NEG	Uridine	4.70718e+07	9.02735e+08	4.83075e+08	1900865326	2019205763	1622710163	2.27649e+07	5.61038e+08	1.02182e+07	3.70995e+08	3.31922e+07	3.98771e+08	0.0222335	0.191438	5.16897
M151T230_1_NEG	Xanthine	3.66166e+07	6.6975e+08	1.51124e+08	2.73686e+08	3.79234e+08	5.19668e+08	4.11655e+07	9.90544e+06	8.84139e+07	1.49712e+07	7.17743e+07	2.9083e+08	0.0369615	0.222817	2.4865
M319T250_2_POS	Zearalenone	2.54454e+07	1.53831e+08	1.01048e+08	2.14876e+08	1.15437e+08	3.15312e+08	955658	2.31562e+07	641629	4.29044e+07	1.39503e+07	6.49579e+07	0.0118684	0.158595	2.0687

## Sheet: Table S6
Supplementary Table S6. Differential fecal metabolites in calves with D2W vs. H2W diarrhea.
ID	MS2_name	H07	H08	H09	H10	H11	H12	D07	D08	D09	D10	D11	D12	Pvalue	FDR	VIP
M429T50_2_NEG	(1-acetyloxy-3-hydroxy-6,8a-dimethyl-7-oxo-3-propan-2-yl-2,3a,4,8-tetrahydro-1h-azulen-4-yl) 4-hydroxybenzoate	4.52367e+08	281138274	2.91469e+08	4.65118e+08	345056301	9.32304e+08	9.92932e+07	2.03599e+08	9.56866e+07	2.23508e+08	1.50722e+08	5.03875e+07	0.0105096	0.106436	3.45172
M495T423_NEG	(1s,4as,7s,7as)-7-hydroxy-7-methyl-1-[(2s,3r,4s,5s,6r)-3,4,5-trihydroxy-6-[(4-hydroxybenzoyl)oxymethyl]oxan-2-yl]oxy-4a,5,6,7a-tetrahydro-1h-cyclopenta[c]pyran-4-carboxylic acid	1244269105	7.75217e+08	631033944	4.38553e+06	8.01003e+08	2.44227e+08	6.95367e+07	7.87728e+07	162982418	6.63826e+07	8.78311e+07	2.9484e+08	0.0233254	0.145695	4.11991
M429T51_POS	(2.beta.,3.alpha.,5.alpha.,16.beta.,17.beta.)-17-acetoxy-3-hydroxy-2-(4-morpholinyl)-16-(1-pyrrolidinyl)androstane	4.1578e+08	189746968	2.38568e+08	101814770	2.17211e+08	9.71845e+07	1.80019e+07	3.88589e+06	3.24141e+07	8.19885e+06	101901328	8.24074e+07	0.00743663	0.0922424	2.58672
M429T31_POS	(2.beta.,3.alpha.,5.alpha.,16.beta.,17.beta.)-2-(4-morpholinyl)-16-(1-pyrrolidinyl)androstane-3,17-diol	1833053000	8.72118e+08	1003697870	5.92053e+08	1161584440	411713152	6.24127e+07	5.38889e+07	1.02939e+08	3.59486e+07	9.81596e+07	4.07553e+08	0.00241506	0.0632927	6.10385
M493T152_NEG	(2s,3r,5r,10r,13r,14s,17s)-2,3,14-trihydroxy-10,13-dimethyl-17-[(2r,3r,5r)-2,3,6-trihydroxy-5,6-dimethylheptan-2-yl]-2,3,4,5,9,11,12,15,16,17-decahydro-1h-cyclopenta[a]phenanthren-6-one	1.59142e+08	7.86686e+08	3.72586e+08	8.861e+08	5.9325e+08	1.04559e+08	7.23143e+06	2.9409e+07	1.14637e+07	1.75333e+07	1.02421e+07	4.1005e+08	0.0215393	0.14051	3.65004
M375T53_NEG	(r)-butaprost (free acid)	2.73597e+07	3.71723e+08	6.51025e+07	133308958	1.50124e+07	1.68336e+08	3.96663e+08	785401698	1.13192e+08	2.9467e+08	6.34767e+08	3.65712e+08	0.023107	0.145197	3.46333
M329T49_NEG	(z)-9,12,13-trihydroxyoctadec-15-enoic acid	1.10827e+08	3.22587e+08	3.77676e+08	4.82006e+08	1.18299e+08	1.98208e+08	7.93594e+08	7.99311e+08	5.29216e+08	5.05456e+08	9.30514e+08	4.17693e+08	0.00347829	0.0704981	4.09709
M496T221_4_POS	.alpha.-ergocryptine	2.41222e+08	1197587633	1.14288e+08	4.50853e+08	9.18057e+07	2401059423	4155412408	4083074269	3793382126	4216406717	4355063407	1656258774	0.000345671	0.0327513	11.8016
M787T170_POS	1,2-dioleoyl-sn-glycero-3-phosphatidylcholine	6.41779e+08	806487536	1.10184e+08	7.66255e+08	2.3753e+08	1101809398	2380836457	1344194352	1657846699	1567060900	1577251463	6.92727e+08	0.00633041	0.0881103	5.94334
M447T82_2_NEG	1,3,5(10)-estratrien-3,17.beta.-diol 17-glucosiduronate	1662049148	1313950674	4.74613e+08	9.61962e+08	1589224029	3250587600	5.82453e+07	2.7491e+08	1.45734e+08	1.97149e+08	9.83698e+07	1421293141	0.0235664	0.146388	6.3201
M481T26_1_NEG	1.alpha.-methyl-5.alpha.-androstan-3.alpha.,17.beta.-diol glucuronide	2708240871	3028049476	2229582451	2701612724	3312303651	3343820357	2.62965e+08	5.5492e+08	653304980	2.95842e+08	6.3979e+08	2224752469	0.000112546	0.0218533	9.92301
M432T166_NEG	11,12-dihydroxy-13-methoxy-4,5,8-trimethyl-3-(2-methylpropyl)-1h,2h,3h,4h,6ah,9h,10h,11h,12h,13h,14h,15h,15bh-cycloundeca[e]isoindole-1,15-dione	2.41802e+07	2.91418e+07	2.76807e+08	2.57449e+08	1.23648e+08	2.19038e+08	2.39078e+06	2.04334e+07	2.1676e+07	1.15486e+06	2.39612e+06	3.75109e+07	0.012522	0.114304	2.28082
M343T329_NEG	13-hydroxy-4z,7z,10z,14e,16z,19z-docosahexaenoic acid	2.95594e+08	246648369	5.56432e+07	1.45096e+08	3.25183e+08	1.64271e+08	647439	4.79256e+07	3.57877e+07	4.39282e+06	1.02662e+07	1.73661e+08	0.00896469	0.10014	2.51077
M299T58_2_NEG	13-hydroxy-9z,11e-octadecadienoic acid	5376623889	19836930487	22335752706	9017912695	7376658091	4737729503	14768043293	32689325568	30460808344	24177625473	30392960159	22236095047	0.00630512	0.0879139	24.9084
M213T54_NEG	1-Deoxy-D-xylulose 5-phosphate	2.09958e+08	4.71574e+08	3.92343e+08	1.76419e+07	3.65938e+08	3.73533e+07	2.49467e+06	7.15475e+06	6.29281e+06	1.52802e+06	2.50143e+06	7.33494e+07	0.0144481	0.120221	2.74555
M510T219_POS	1-heptadecanoyl-sn-glycero-3-phosphocholine	6.42932e+06	6.60153e+07	6.15603e+06	2.77587e+07	4.50354e+06	1.49898e+08	1.77435e+08	1.92932e+08	2.36204e+08	1.51807e+08	1.71391e+08	9.19021e+07	0.00192111	0.0598475	2.33151
M393T99_2_POS	1h-pyrano[3',4':6,7]indolizino[1,2-b]quinoline-3,14(4h,12h)-dione, 4,11-diethyl-4,9-dihydroxy-, (4s)-	1240773187	1562765507	7.43272e+08	4.6811e+06	1567224679	829666439	7.39647e+07	7.25822e+07	1.04711e+08	8.61015e+07	3.45652e+07	7.76005e+08	0.0143317	0.120026	5.24068
M438T228_NEG	1-lauroyl-2-hydroxy-sn-glycero-3-phosphocholine	1.9347e+08	4.51816e+08	1.96072e+08	5.37362e+08	1.79074e+08	2.15964e+08	1.18442e+07	8.3814e+07	7.12169e+07	7.46932e+06	2.77045e+07	3.27055e+08	0.0282117	0.15881	2.56933
M642T143_POS	1-linoleoyl-2-oleoyl-rac-glycerol	2.65443e+08	502677391	1.53391e+08	2.89186e+08	1.79387e+08	3.19017e+08	11511765	9.05155e+07	1.17482e+08	2.10231e+07	2.83001e+07	2.14398e+08	0.00668276	0.0889979	2.69017
M707T177_POS	1-myristoyl-2-palmitoyl-sn-glycero-3-phosphocholine	1.33513e+08	1.49139e+08	2.56876e+07	8.12039e+07	3.49358e+07	6.76307e+07	2.48283e+08	2.30506e+08	2.03966e+08	1.89966e+08	4.39056e+08	1.11058e+08	0.0103956	0.106082	2.47891
M733T174_1_POS	1-oleoyl-2-myristoyl-sn-glycero-3-phosphocholine	1.68579e+08	3.23522e+08	6.74197e+07	3.02017e+08	7.18328e+07	2.28921e+08	416548098	6.13817e+08	4.44426e+08	550469409	9.97799e+08	1.90302e+08	0.0164119	0.12656	3.66335
M817T166_NEG	1-palmitoyl-2-arachidonoyl-sn-glycero-3-phosphocholine	1.64548e+07	7.29003e+06	1.58474e+06	6.05058e+06	3.69057e+06	2.06966e+07	1.80917e+08	1.57937e+08	1.03442e+08	9.46678e+07	1.60118e+08	1.44846e+07	0.00148119	0.0525872	2.15639
M759T172_1_POS	1-palmitoyl-2-linoleoyl-sn-glycero-3-phosphocholine	766994797	6.64393e+08	1.09813e+08	4.50556e+08	1.94274e+08	7.80855e+08	2409245522	1049586600	1448789423	1090432132	1492272847	5.59074e+08	0.0128906	0.115392	5.43799
M992T221_POS	1-palmitoyl-sn-glycero-3-phosphocholine	1.29864e+06	2.3473e+07	2.51147e+06	2.72308e+06	1.16139e+06	1.06732e+08	4.82052e+08	482831949	4.10458e+08	499234846	5.84272e+08	5.02752e+07	0.000528885	0.0372716	4.24942
M391T57_2_NEG	1-piperazineacetic acid, 4-(phenylmethyl)-, 2-[[2-hydroxy-3-(2-propen-1-yl)phenyl]methylene]hydrazide	1.22946e+07	1.17641e+08	2.37626e+07	6.64236e+07	2.80907e+07	5.47424e+07	1924612345	7.9879e+08	3.19177e+08	1001063224	1940637190	183668146	0.0105637	0.106525	6.13646
M811T165_POS	1-stearoyl-2-arachidonyl-sn-glycero-3-phosphocholine	7.59626e+07	5.29601e+07	1.53478e+07	5.60561e+07	2.75628e+07	1.11309e+08	1418174091	8.24033e+08	5.63182e+08	4.5456e+08	1058757129	9.49337e+07	0.00534676	0.0821842	5.13583
M546T218_POS	1-stearoyl-2-hydroxy-sn-glycero-3-phosphocholine	4.41315e+07	2.22477e+08	2.02285e+07	2.11373e+08	3.04067e+07	3.69666e+08	2.73991e+08	5.30619e+08	2.96678e+08	3.27871e+08	2.48162e+08	3.82427e+08	0.0217468	0.140911	2.67044
M480T222_3_NEG	1-stearoyl-2-hydroxy-sn-glycero-3-phosphoethanolamine	1.13167e+08	5.89661e+08	6.91616e+07	2.68599e+08	5.00628e+07	9.6648e+08	1526642602	1302125017	1513484908	1676139207	1711004576	8.00208e+08	0.000341569	0.0327513	7.14781
M787T214_POS	1-stearoyl-2-linoleoyl-sn-glycero-3-phosphocholine	2.23222e+06	5.06463e+06	3.71752e+06	7.81e+06	754378	8.56777e+06	4.92615e+08	1.45068e+07	313624385	8.41753e+07	2.47599e+08	6.84802e+06	0.0375499	0.181235	2.33861
M524T218_2_POS	1-Stearoyl-sn-glycerol 3-phosphocholine(LPC(18:0))	1.97685e+08	1090945366	6.13208e+07	4.37699e+08	1.04054e+08	1795948220	3736925396	4021266649	3580897755	3076440631	3395645170	2083181836	4.7e-05	0.0173401	11.478
M299T348_1_NEG	2,3-dehydrosilybin a	4.39153e+07	1.26985e+08	1.13574e+08	4.02203e+08	100318631	1.43962e+08	4.97424e+08	2.05069e+08	4.14524e+08	4.07781e+08	2.91074e+08	2.0007e+08	0.0302172	0.163656	2.33631
M382T63_NEG	2-[[1-(4-nitrobenzoyl)pyrrolidine-2-carbonyl]amino]benzoic acid	378045	3.09631e+07	2.66959e+07	904101	1.37126e+07	4.28061e+06	1.33659e+08	111437866	8.00932e+07	9.75046e+07	149487686	1.31506e+08	4.96e-06	0.0130067	2.31163
M195T65_2_NEG	2'-deoxycytidine 5'-monophosphate	3.65853e+08	3.44189e+07	1.39107e+08	3.19409e+07	1.8055e+08	2.10076e+07	2.474e+06	2.79542e+06	2.15483e+06	953816	249713	4.66143e+06	0.042365	0.190895	2.12666
M275T199_POS	2'-deoxyinosine	4.23746e+08	7.23483e+07	4.77976e+08	8.98226e+08	3.31971e+08	2.46034e+08	1.76762e+08	8.51715e+07	1.63897e+07	1.17105e+07	3.71519e+06	2.89743e+07	0.0128107	0.115004	3.8107
M576T32_POS	2-linoleoyl-1-palmitoyl-sn-glycero-3-phosphoethanolamine	6.98017e+07	4.00713e+07	4.09783e+07	1.13442e+07	3.22142e+07	1.93925e+07	1.38639e+08	1.73754e+08	9.70848e+07	1.64397e+08	2.16468e+08	6.06218e+07	0.00141857	0.051785	2.17771
M141T39_NEG	2-mercaptoethanesulfonic acid	7.18106e+07	2.05138e+07	1.0562e+08	2.76945e+08	1.16954e+08	186532153	1.35041e+07	6.55253e+07	1.35705e+07	1.80752e+07	8.82806e+06	6.3754e+06	0.0169715	0.127754	2.03488
M168T139_NEG	2-methoxy-5-nitrophenol	6.48455e+08	5.43996e+07	5.06093e+08	6.98749e+07	2.41113e+08	2.36321e+06	1.52172e+06	1.83108e+07	9.42744e+06	1.13761e+06	1.10241e+06	2.51906e+06	0.0461718	0.199458	2.89503
M783T174_POS	2-oleoyl-1-palmitoyl-sn-glycero-3-phosphocholine	1.65676e+08	1.44057e+08	4.5204e+07	1.05704e+08	48360622	2.38209e+08	1.67338e+08	9.39806e+08	6.802e+08	6.3585e+08	1.68194e+08	1.88927e+08	0.0351902	0.175313	3.30763
M139T329_1_NEG	3,5-dihydroxybenzyl alcohol	1004120287	1238190059	2570476262	1795154060	8.21825e+08	3.24963e+08	130313408	1.9161e+07	4.11469e+08	2.83602e+07	8.27893e+06	4.2407e+08	0.00710063	0.0907847	6.53199
M195T286_NEG	3,7-Dimethyluric acid	2.27104e+08	2.09847e+08	143378562	2.61887e+08	3.12502e+08	2.33724e+08	1.84885e+07	3.44786e+07	1.7646e+07	2.04283e+07	2.08594e+07	8.96074e+07	1.61e-05	0.0157669	3.15001
M277T97_NEG	3-amino-1-propanesulfonic acid	2.72939e+08	5.67114e+08	627609362	4.12781e+08	2.3248e+08	2.12352e+08	1.25092e+08	6.77632e+07	1.59859e+07	3.98231e+07	9.64069e+07	3.42947e+08	0.0107484	0.107676	3.01378
M299T301_NEG	3'-hydroxymelanettin	302146534	2.25646e+08	301093103	2.11038e+06	3.61449e+08	4.67347e+08	453018205	7.17817e+08	3.55608e+08	3.9268e+08	4.55293e+08	4.83089e+08	0.0359055	0.17738	2.58636
M87T256_POS	3-methyl-2-buten-1-ol	1.96401e+08	5.69871e+07	3.86667e+07	3.26174e+08	7.44526e+07	2.03568e+08	1.59339e+07	1.6183e+07	2.60026e+07	7.00783e+06	2.59074e+07	1.53205e+07	0.0166359	0.127005	2.27069
M521T28_NEG	4-({5-[5-hydroxy-3-({[(2z)-2-methylbut-2-enoyl]oxy}methyl)pentyl]-8a-(hydroxymethyl)-5,6-dimethyl-3,4,4a,5,6,7,8,8a-octahydronaphthalen-1-yl}methoxy)-4-oxobutanoic acid	1059507273	2.18173e+08	2.77844e+08	2.53437e+08	2.61121e+08	3.08341e+08	2.4345e+07	1.68527e+07	2.08883e+08	1.52642e+07	1.89092e+07	1.49461e+08	0.0402745	0.186525	3.42126
M249T34_NEG	4,4'-sulfonylbisphenol	4.25433e+08	4.44681e+08	1.99887e+07	3.96717e+08	3.80329e+08	1.80836e+08	2.29185e+07	2.77054e+08	213319	3.09868e+07	7.42081e+07	9.14964e+07	0.0191763	0.134585	2.80358
M153T88_NEG	4-mercaptobenzoic acid	2.50733e+08	116853445	1.59196e+08	2.87713e+07	1.05333e+08	2.07767e+07	1.8641e+06	7.07407e+06	1.31598e+06	3.28467e+06	2.52441e+06	9.57719e+06	0.0108643	0.108285	2.03384
M169T122_NEG	4-phenylphenol	1.13574e+08	112450850	2.55161e+08	208683693	3.68847e+08	3.06918e+08	6.87437e+07	1.11348e+08	1.77477e+08	5.85032e+07	4.88721e+07	166100828	0.0289719	0.160643	2.0974
M369T31_2_NEG	5.alpha.-androstan-3.beta.-ol-17-one sulfate	8.09689e+08	7.70695e+08	3.69655e+08	3.25933e+08	9.58564e+08	2107929486	2.20893e+07	2.63239e+07	6.16234e+07	2.31773e+07	5.66059e+06	7.27963e+08	0.0274197	0.156925	4.92878
M190T234_NEG	5-hydroxyindoleacetate	3.75237e+08	9.46367e+07	3.30029e+08	4.87126e+07	4.33404e+08	2.14365e+06	6.4631e+06	919576	3.825e+07	358638	1.87059e+06	704319	0.022505	0.143129	2.77871
M467T83_1_NEG	5-methoxytryptophan	5.06841e+08	9.8526e+08	1.38471e+08	3.52657e+08	7.28042e+08	1680501685	2.19084e+07	9.44008e+07	7.29688e+07	2.33263e+07	4.34541e+07	6.28589e+08	0.0378766	0.181687	4.14459
M407T33_NEG	6,8-diprenylnaringenin	5.18454e+08	2.61911e+07	1.33088e+08	3.99422e+07	1.49162e+08	1.61813e+08	560213	2.70564e+06	743424	696256	340084	2.29258e+07	0.0461996	0.199458	2.41798
M257T77_1_NEG	6-phosphogluconic acid	140323297	5.75308e+08	1.75499e+08	2.7911e+07	1.85686e+08	1.80501e+08	4.841e+08	1147255433	8.6789e+08	947291392	1246866183	2312514116	0.00479815	0.0786917	6.31119
M166T207_POS	7-methylguanine	1028903076	1244435004	6.27798e+08	1082166034	1145726700	7.23226e+08	1.73389e+08	2.12758e+08	2.02129e+08	1.24301e+08	4.87365e+07	8.27735e+08	0.000898517	0.0452361	5.59407
M367T128_NEG	Acacetin diacetate	8.17408e+06	1.45799e+08	1.85e+08	6.37133e+06	6.58022e+06	8.84716e+07	2.4797e+08	9.50291e+08	1.40969e+08	5.46702e+08	6.28405e+08	1496790718	0.0159831	0.125066	4.7512
M146T402_POS	Acetylcholine	3.81687e+08	5.58256e+08	1187198747	1121024534	1.2925e+08	1.86014e+07	112991945	6.52169e+07	7.65765e+07	78250745	6.28153e+06	5.36296e+06	0.030702	0.164862	4.03469
M194T86_2_NEG	Acridone	5566876312	2599265232	1532033667	2.06415e+08	1176477140	8.7154e+08	9.71774e+07	7.06388e+07	1.69944e+08	3.01736e+07	1.79788e+07	3.74446e+08	0.0391599	0.18385	7.793
M114T377_POS	Agmatine	3.41812e+08	1.30661e+08	2.47882e+08	2.43774e+08	1.97399e+08	62958220	1.57654e+07	3.72679e+07	4.61827e+07	1.34324e+07	1.31125e+07	1.58669e+08	0.00674841	0.0891391	2.57808
M98T289_NEG	Allyl isothiocyanate	2.82183e+07	7.07428e+07	3.50576e+07	6.3212e+07	3.81784e+07	6.43981e+07	512565889	1.45561e+08	3.83173e+08	7.09699e+08	1353632263	1.90923e+08	0.0207619	0.138012	4.3047
M145T382_NEG	Alpha-ketoglutarate	1.61234e+07	3.80026e+07	5.25339e+06	2.22402e+07	1.95406e+07	2.67396e+07	3.35798e+08	3.09134e+07	1.93089e+08	3.30001e+08	426477577	8.12573e+07	0.00803375	0.0952184	2.87477
M322T54_NEG	Anorexigenic peptide	266879147	3.4512e+08	8.22842e+07	1.84467e+08	4.92036e+08	2.33247e+08	598276	3.39563e+07	393582	5.351e+06	5.81889e+07	3.44473e+08	0.035099	0.175168	2.50421
M303T50_2_NEG	Arachidonic acid (peroxide free)	2.46394e+08	1144592243	1083239749	3.41491e+08	2.28178e+08	4.79854e+08	3441680456	2273613480	1538449612	1672445057	2465116059	1333857726	0.00170931	0.0570785	8.23777
M173T81_POS	Arcaine	4.74815e+08	7.24089e+07	4.39077e+08	8.7484e+07	2.60869e+08	1.21336e+07	7.68001e+06	1.7616e+07	1.42262e+07	8.73379e+06	7.87019e+06	33229427	0.027283	0.156551	2.75153
M415T37_NEG	Arenobufagin	1.69147e+08	1.1802e+08	1.11405e+08	1.75026e+08	2.83662e+08	6.98051e+08	2.77148e+07	4.52248e+07	2.38923e+07	2.42221e+07	7.2524e+06	1.42402e+08	0.0450185	0.196958	2.57849
M139T195_NEG	Benzoic acid, 2-fluoro-	8.52021e+08	2.74182e+08	4.19459e+08	7.19692e+08	2.35855e+08	6.16619e+07	3.0441e+06	1.33449e+07	2.77407e+07	2.34543e+06	4.85682e+06	1.24776e+07	0.00720682	0.0913473	4.18152
M241T302_2_NEG	Bisphenol b	7.48187e+08	1.09791e+08	2.10851e+08	4.10849e+08	1347487101	1.55762e+08	3.27392e+06	4.50852e+06	6.23982e+07	3.48768e+06	1.09229e+06	6.4394e+07	0.0358165	0.177201	4.22503
M399T29_2_NEG	Bonactin	1.92748e+08	1.01554e+08	7.86708e+07	1.79588e+08	122582773	4.73736e+08	3.10441e+07	3.75956e+07	6.6317e+07	9.65214e+06	1.03799e+07	1.3065e+08	0.0430984	0.192349	2.15109
M468T423_NEG	Bucladesine	4.7291e+08	4.0492e+08	2.79077e+08	1.70226e+06	3.40609e+08	9.77434e+07	3.9187e+07	3.96878e+07	7.98575e+07	1.93129e+07	4.16789e+07	1.55556e+08	0.0246964	0.149913	2.59614
M87T120_NEG	Butanoic acid	5748736110	4230298291	12277685059	10114494808	5334942992	8181386836	1842458093	3303036761	5259950765	1203399269	1248306776	4186655953	0.00762102	0.0934243	13.8226
M171T54_NEG	Capric acid	2.9017e+07	4.16494e+08	6.32217e+08	5.79754e+07	1.63515e+08	6.72903e+07	1548656290	9.20782e+08	1017747865	5.71118e+08	2334216942	6.8096e+08	0.00789311	0.094477	6.1969
M236T96_NEG	Chicoric acid	2.15799e+08	3.04575e+08	4.59942e+07	3.70274e+08	560852476	9.12697e+07	1.14625e+06	1.60695e+06	4.67509e+06	671463	1.73991e+06	6.61327e+06	0.0070517	0.0905632	3.25825
M341T250_POS	Chitobiose	9.13785e+07	9.76869e+07	4.26961e+07	1.65722e+08	1.93665e+08	2.71378e+08	4.60967e+06	1.03291e+07	6.78577e+06	5.00097e+06	6.47856e+06	4.85024e+07	0.0036849	0.0717611	2.31872
M465T25_2_NEG	Cholesteryl sulfate	11386888299	12859845041	17050026490	12613670228	9539733049	11770142267	2348785712	4085548636	5450983176	1243269705	4195272937	10884698928	0.00103076	0.0468875	18.15
M104T301_2_POS	Choline	6.35811e+08	1106416825	5.51941e+08	1415626675	7.69716e+08	1795827459	5204610170	3654324882	3769331396	4201985814	2484660678	2083052535	0.000557091	0.0374441	10.4332
M281T50_NEG	Cis-vaccenic acid	2990109602	6620954404	5456126117	5469557874	3311355828	3861315877	12679912105	15434315241	11215403624	14013388681	19902453883	7544199605	0.000598633	0.0387461	20.5082
M317T250_2_NEG	Coenzyme q2	1.65055e+08	2.44255e+08	1.29604e+08	2.40817e+08	3.46854e+08	3.5378e+08	9.05098e+06	3.68058e+07	1.27083e+07	1.6051e+07	1.87656e+07	1.37175e+08	0.00061752	0.0389967	3.02937
M161T224_NEG	Coniferyl alcohol	2.37931e+08	8.65949e+07	1.08557e+08	1.96234e+07	1.82308e+08	4.49885e+07	664250	2.61903e+06	6.18832e+06	1.82456e+06	394992	1.37025e+07	0.00929267	0.101197	2.09595
M114T189_3_POS	Creatinine	1926917638	9.59389e+08	2467857945	1.14624e+08	5148966586	4206500474	5766396845	8284673813	4106820938	6626984091	5217427619	8810254455	0.00401325	0.0735668	12.6097
M367T96_1_NEG	Curcumin	2.80472e+06	2.64129e+07	7.78036e+06	6.77593e+06	3.38784e+06	2.04168e+07	2.03051e+08	3.3528e+08	6.36569e+07	2.45239e+08	3.07182e+08	2.59838e+08	0.00020385	0.0266049	3.30251
M357T81_NEG	Cyclohexanesulfamic acid	1831045543	7.14263e+08	7.34229e+06	4.0919e+08	1567031456	9.26471e+08	2.61784e+08	8.26774e+07	5.24571e+07	2.72963e+07	2.47698e+07	7.59988e+08	0.0429511	0.191997	5.00045
M183T73_POS	Dacarbazine	5.1237e+07	7.36183e+07	7.91976e+07	3.61906e+08	2.20721e+08	2.17805e+08	1.41279e+07	3.06459e+07	1.30695e+07	2.76642e+07	3.50944e+07	1.1221e+08	0.0320861	0.168273	2.12332
M263T113_NEG	Dapsone hydroxylamine	1.84927e+08	6.71322e+08	6.58837e+08	3.63671e+08	181939077	151392862	6.67107e+07	5.29314e+07	8.43135e+06	2.32851e+07	245037	4.39697e+08	0.0486406	0.203842	2.65187
M133T282_NEG	D-arabitol	3225320543	1212965257	3811854373	1.32183e+06	7.90371e+08	1.71766e+08	3.82727e+07	3.13864e+07	3.39987e+07	6.98299e+06	2.70553e+06	1.55125e+08	0.0464702	0.199859	6.73821
M325T233_NEG	Derrustone	4.22769e+07	3.50451e+08	3.86261e+07	4.71489e+07	9.02525e+07	2.5707e+08	5.01273e+08	5.83799e+08	3.99243e+08	2.54482e+08	4.07612e+08	1579901287	0.0395958	0.185186	3.94517
M141T329_POS	D-erythro-imidazolylglycerol phosphate	1635712434	1363697377	2624851018	1799432958	1343766393	4.17245e+08	1.17867e+08	9.54826e+07	3.77506e+08	8.93384e+06	8.21921e+06	4.24885e+08	0.00116763	0.0479488	7.70436
M340T158_NEG	Desethyleneciprofloxacin	4.40292e+07	2.22036e+08	3.1736e+08	6.77316e+06	7.87542e+07	1.07258e+08	1.25099e+08	4.10133e+08	1.85343e+08	5.52139e+08	3.45615e+08	8.96868e+08	0.0416223	0.189311	3.18669
M89T305_NEG	Dl-lactate	8.66619e+07	1.97447e+08	8.90519e+07	9.195e+07	5.8445e+07	3.66122e+07	2.82358e+08	1.84833e+08	6.50447e+07	290314951	1.57538e+08	2.74809e+08	0.0227329	0.143901	2.07812
M199T52_NEG	Dodecanoic acid	1.09494e+08	7.05024e+08	1096016717	213809445	4.01334e+08	1.79364e+08	3428614917	1251080489	1038289527	7.9036e+08	1577988116	1150099604	0.0274911	0.156936	6.00269
M309T49_NEG	Eicosenoic acid	7.52015e+07	2.41193e+08	2.16493e+08	2.11509e+08	8.69066e+07	6.66525e+07	3.60032e+08	4.39249e+08	3.47446e+08	4.29656e+08	4.90093e+08	2.34966e+08	0.000811529	0.0435622	3.32546
M337T48_NEG	Erucic acid	3.01579e+07	8.03203e+07	5.71778e+07	7.83658e+07	3.48748e+07	2.35198e+07	1.66612e+08	1.41261e+08	138579745	154766145	1.45553e+08	1.02939e+08	4.95e-05	0.0173401	2.10539
M463T183_NEG	Estriol 16alpha-(beta-d-glucuronide)	1.49979e+08	1.24058e+08	1.01175e+08	1.21196e+08	2.12231e+08	2.6719e+08	7.5117e+06	2.42695e+07	2.09373e+07	1.90795e+07	1.52585e+07	1.24829e+08	0.00249658	0.0637437	2.31297
M269T39_NEG	Estrone	1.60744e+08	2.30905e+08	1.74752e+08	1.23526e+08	161205494	1.39436e+08	2.16373e+08	2.68358e+08	2.62459e+08	3.11611e+08	2.71377e+08	1.94686e+08	0.00298304	0.0676962	2.00891
M311T64_NEG	Fa 18:2+2o	9.40101e+07	5.99047e+07	5.78308e+07	8.52687e+07	3.43333e+07	9.20657e+07	3.78274e+08	2.24983e+08	1.51952e+08	5.73022e+07	3.78414e+08	1.00781e+08	0.0298798	0.163072	2.17376
M564T36_NEG	Fahfa 36:1	3.93287e+08	1391880866	8.81713e+08	1.06031e+08	4.14145e+08	1.23144e+08	1460721580	5357636459	2228841534	1991141647	4711935188	1205299248	0.0123887	0.113881	9.60052
M585T36_NEG	Fahfa 38:4	2.67232e+07	1.32789e+08	9.75601e+07	3.99372e+07	3.89402e+07	2.37154e+07	1.29146e+08	2.67738e+08	1.1825e+08	1.72357e+08	1.85843e+08	1.2804e+08	0.0045044	0.0780234	2.19646
M304T97_NEG	Fenoldopam	9.95166e+07	1.25478e+08	192998103	1.96323e+08	8.44771e+07	8.03291e+07	3.41161e+07	2.81062e+07	5.56757e+06	1.10962e+07	1.66955e+07	6.80631e+07	0.00136534	0.0511286	2.07627
M274T68_4_POS	Fenpropidin	2459902895	3577151573	3362570790	3775834035	3067229852	2742601937	3784394112	3677762509	3823338798	3604711911	3970179563	3906983859	0.0143084	0.119908	4.91739
M434T423_2_POS	Fluvastatin	2288517127	1414775191	1095737739	5.92212e+06	1499653803	439153905	5.67643e+07	1.1311e+08	1.75853e+08	9.27437e+07	7.30334e+07	4.54962e+08	0.0171213	0.128414	5.87893
M461T65_NEG	Forsythoside e	2.55214e+08	3.04135e+08	1.86157e+08	427001510	3.16882e+08	536096270	3.09802e+07	4.04128e+07	2.56991e+07	4.5837e+07	3.18939e+07	2.44931e+08	0.00153688	0.0533601	3.37084
M387T316_NEG	Geniposide	1.80659e+07	8.72968e+07	1.69501e+07	2.67899e+06	2.88421e+07	1.45885e+08	1.51907e+08	2.14923e+08	8.40876e+07	1.98182e+08	1.87816e+08	3.69805e+08	0.00711131	0.0907847	2.49573
M146T411_1_NEG	Glutamic acid	7.33706e+07	161179136	4.10467e+07	1.26806e+08	1.3282e+08	4.38296e+07	1728942037	2.11421e+08	5.4924e+08	2028312993	2928496715	2.38083e+08	0.0267725	0.155327	6.50087
M171T102_NEG	Glycerol 3-phosphate	5573297822	4378029605	7729361183	2.15774e+08	5186849889	398151061	3.19177e+07	6.58661e+07	1.21963e+08	1.79357e+07	9.97521e+06	1706218574	0.0171905	0.128576	11.1146
M604T40_POS	Glycerol trioleate	3.77328e+07	8.76039e+07	2.92394e+07	1.28021e+07	2.89542e+07	1.50546e+07	4.37421e+08	3.84493e+08	3.50203e+08	816175195	3.93181e+08	3.41184e+07	0.00496589	0.0794616	3.88178
M214T410_POS	Guanabenz	2.47415e+07	5.22789e+07	1.09632e+07	4.29225e+07	3.26095e+07	3.57283e+07	2.45392e+08	9.33626e+07	1.36797e+08	2.21998e+08	2.99451e+08	1.02086e+08	0.00159478	0.0546464	2.55853
M166T178_NEG	Guanidinoethyl sulfonate	5336361818	4678872297	2648853771	2.98261e+07	2564369385	1407248602	297712198	7.10597e+08	5.12447e+08	222347933	3.93149e+08	7.79231e+08	0.0183627	0.132421	8.72459
M197T121_NEG	Harmol	1.03798e+08	8.19719e+07	274809935	193273107	3.4964e+08	2.23935e+08	3.00068e+07	7.4361e+07	1.1797e+08	2.23075e+07	4.87202e+06	9.63715e+07	0.00894572	0.100135	2.43919
M429T205_NEG	Hecogenin	2.52711e+08	2.89326e+08	4.33159e+07	4.94165e+07	4.77447e+07	417133258	8.38966e+06	1.77297e+07	1.20085e+07	2.23042e+06	3.88421e+06	5.47048e+07	0.028966	0.160643	2.24008
M288T151_POS	Heptadecasphinganine	413380304	4.32913e+08	1302239686	6.16569e+08	5.60647e+08	1.12383e+08	3.87895e+06	4.45099e+07	5.96442e+07	5.1942e+06	5.61582e+06	418161493	0.0202743	0.137046	4.06841
M241T97_2_NEG	His-ser	1958493642	1673482482	2576508228	1962733298	1294791847	959999661	2.34256e+08	2.04128e+08	3.90817e+07	7.52384e+07	904588	7.20507e+08	0.000138083	0.023807	8.41292
M154T434_NEG	Histidine	8.67876e+06	1.20003e+07	7.58519e+06	2.38829e+07	7.52665e+06	7.28241e+06	4.33413e+08	8.93333e+06	1322219982	3.43278e+08	9.24603e+08	6.02163e+07	0.0369793	0.180065	3.90086
M230T386_2_POS	Icaridin	7.52221e+08	2.14058e+08	8.7261e+08	3.40648e+08	6.02709e+08	2.73807e+07	2.62478e+06	3.92308e+07	4.4151e+06	1.49782e+06	2.23873e+06	1.38929e+07	0.00659793	0.0888461	4.32946
M227T113_2_NEG	Ile-Pro	8.92012e+08	1507695340	2653595592	1531100944	764266922	5.15143e+08	1.15822e+08	1.21913e+08	1.82381e+07	3.41628e+07	3.55428e+06	6.93417e+08	0.0064174	0.088228	6.45984
M293T27_NEG	Ile-Tyr	3.07825e+08	110356997	3.00492e+08	7.81332e+07	1.65395e+08	138902861	2.60509e+06	557539	2.79974e+07	687897	2.7621e+06	1.70074e+08	0.0116686	0.111615	2.39377
M356T159_NEG	Indomethacin	1.38495e+07	137041816	1.13216e+07	813294	4.66426e+06	3.36953e+07	1.43225e+08	1.46579e+08	3.32178e+08	1.98032e+07	220242417	3.27397e+08	0.0117775	0.111894	2.46258
M427T68_NEG	Irbesartan	9.6679e+07	2.37416e+08	3.49002e+08	3.11789e+08	1.31306e+08	1.57595e+08	2.56599e+06	1.78556e+07	2.62221e+07	5.73284e+06	4.56108e+06	108174574	0.00195772	0.0601443	2.72354
M125T146_NEG	Isethionate	13101110580	15319060732	3910976537	9.35671e+07	7108618120	4194139254	543905399	8.31876e+08	3.28009e+08	1044663134	6.9957e+08	1986297021	0.023917	0.147464	14.073
M130T298_NEG	Isoleucine	2.13708e+08	1.3379e+08	2.03522e+08	109459820	1.68244e+08	4.82491e+07	6.74374e+08	2.61527e+08	4.55751e+08	1.16649e+08	6.72965e+08	2.20867e+08	0.0300936	0.163654	2.8146
M419T56_3_NEG	Jasmonic acid	4.51533e+07	4.27194e+08	1.88983e+07	9.2453e+07	1.83247e+07	2.50641e+08	2143486055	1555099660	4.88548e+08	1022832712	2390306259	5.0543e+08	0.00514895	0.0803855	7.11266
M342T165_NEG	Lauroyl-l-carnitine	8.68362e+08	842514126	1.68219e+08	1.73891e+08	5.75041e+08	5.18331e+08	5.69274e+06	214674813	7.19522e+07	5.19902e+06	2.94518e+06	1.57013e+08	0.00646781	0.0886023	4.10262
M258T433_2_POS	Levorphanol	4.79354e+08	1.74395e+08	2.03036e+08	265767574	2.87048e+08	4.80374e+07	936447	993978	2.65163e+06	222322	603089	1.27471e+07	0.00214669	0.0612051	3.30109
M118T325_POS	L-norvaline	1.39106e+08	9.96359e+07	1.59436e+08	1.14675e+08	3.13362e+08	1.29342e+08	2.4692e+08	3.15747e+08	3.95648e+08	1.6836e+08	4.60721e+08	211837994	0.0306217	0.164575	2.08954
M520T214_1_POS	Lpc 18:2	4.90275e+07	5.30587e+07	3.67252e+06	1.43964e+07	3.18888e+06	1.02469e+08	5.55401e+08	1.7643e+08	2.71607e+08	4.75023e+08	8.70414e+08	4.29718e+07	0.014795	0.121862	3.6939
M128T314_NEG	L-pyroglutamic acid	298493664	2.61443e+08	1.21315e+08	4.41363e+08	1.73668e+08	1.46844e+08	1682472064	3.10793e+08	3.96989e+08	1397435588	1449229995	2.11922e+08	0.036814	0.179614	4.65067
M95T113_NEG	Methylphosphonic acid	1196005092	2.36161e+08	6.50183e+08	9.66819e+08	5.58867e+08	194937247	9.55399e+07	1.25011e+08	4.76002e+07	9.81247e+07	5.52565e+07	1.13765e+08	0.00725006	0.0916632	4.85278
M227T343_POS	Metyrapone	180730670	2.16748e+08	6.52227e+07	2.77811e+07	2.35072e+08	4.97621e+07	1.55606e+06	1.87362e+06	5.8803e+06	1.46721e+06	287334	9.32109e+06	0.00734506	0.0920708	2.1758
M147T226_NEG	Mevalonic acid	1267373658	8.22672e+08	9.40007e+08	1.82915e+07	3.88107e+07	6.79316e+07	1.28955e+07	1.01465e+07	1.26634e+07	9.54851e+06	750026	9.82124e+07	0.0499403	0.205995	3.79426
M210T177_NEG	Milrinone	8.82554e+07	5.71838e+08	5.56452e+08	1445493428	4.63715e+08	4.23895e+08	3.40611e+07	9.43722e+07	4.07188e+07	5.73088e+07	5.32865e+07	2.48453e+08	0.0232167	0.145452	4.14017
M397T29_NEG	Mitragynine	7.05126e+08	358121774	3.36846e+08	4.17032e+08	4.509e+08	9.80213e+08	6.38862e+07	5.81422e+07	1.0595e+08	3.70986e+07	4.39917e+07	144128718	0.00121241	0.0487743	4.53574
M88T86_POS	Morpholine	2.36167e+08	9.00464e+07	1.09798e+08	1.98347e+08	1.25007e+08	2.38058e+08	22355672	3.48224e+07	2.16891e+07	2.78893e+07	2.11967e+07	4.70369e+07	0.000515005	0.0372716	2.54331
M227T52_NEG	Myristic acid	2.05471e+08	1244485262	1141371923	5.78097e+08	6.34183e+08	3.88281e+08	1354666360	1759206495	1113293218	1264493579	3386388085	1320743519	0.0271382	0.156352	6.24519
M168T411_NEG	N-(phosphonomethyl)glycine	1.49837e+07	3.14448e+07	8.16276e+06	2.59156e+07	2.33729e+07	1.24671e+07	1.55182e+08	4.37433e+07	7.49575e+07	175424334	2.25206e+08	4.845e+07	0.00847816	0.0982749	2.00455
M204T178_POS	N-acetyl-.beta.-d-mannosamine	2.90955e+07	805790887	1.55576e+08	4.25128e+08	1.45644e+08	3.011e+08	939895	2.1224e+07	2.08458e+06	1.3713e+06	1.51286e+06	1.2397e+08	0.0332709	0.171232	2.75997
M154T165_2_POS	N-acetylhistamine	3.53274e+08	3.04557e+08	4.71873e+08	3.31777e+08	7.98722e+08	8.44559e+07	3.01361e+08	2.20891e+07	3.2961e+07	1.51734e+07	4.73909e+06	5.68185e+07	0.0138975	0.118617	3.53519
M130T303_NEG	N-Acetyl-L-alanine	2.09235e+07	1.93424e+07	2.02386e+07	1.43592e+07	2.09847e+07	6.51108e+06	2.82385e+08	7.55086e+06	3.13019e+08	9.20117e+07	4.49344e+08	1.1678e+07	0.0397778	0.185575	2.33165
M131T377_2_POS	N-acetylputrescine	8.80673e+08	3.26351e+08	6.31989e+08	6.33535e+08	5.11098e+08	1.62063e+08	3.9349e+07	9.30685e+07	1.16768e+08	3.49067e+07	3.3718e+07	3.98625e+08	0.0065566	0.0887148	4.15383
M413T37_NEG	Naltrindole	5.79828e+08	229213673	1.91307e+08	4.42921e+08	4.39675e+08	1102354094	3.27024e+07	8.8202e+07	4.11615e+07	4.00867e+07	3.42946e+07	1.92406e+08	0.011128	0.109422	4.03985
M147T41_NEG	Nitric acid	1.34472e+07	1.84413e+07	5.10812e+07	6.89536e+07	1.68623e+07	2.28306e+07	7.17136e+08	1.71311e+08	4.39334e+08	7.9766e+08	1.38271e+08	5.29511e+07	0.0209954	0.138722	3.41175
M394T60_2_NEG	N-oleyl-leucine	2.09601e+07	6.5903e+07	2.78641e+08	3.20683e+07	5.10604e+07	1.57435e+07	311783122	1302294476	6.99941e+08	4.03852e+08	6.69199e+08	1.1143e+08	0.0160363	0.125239	4.32525
M196T177_NEG	Norvaline, 5-phosphono-	1352181081	8.71918e+08	8.8568e+08	3.57472e+06	3.52534e+08	1.16519e+08	1.22176e+06	353476	4.72297e+06	1.36756e+07	1.59209e+07	1.72773e+08	0.0261524	0.153939	4.27219
M537T34_NEG	N-palmitoyl-d-sphingosine	2.08655e+08	3.0315e+06	5.87311e+08	1265626378	4.16447e+08	5.66288e+08	867630204	9.53099e+08	924320962	887937161	1066539834	9.74379e+08	0.0345788	0.173756	3.57435
M143T61_NEG	Octanoic acid	1.59979e+07	3.04687e+07	3.61025e+07	9.23822e+06	2.66157e+07	2.12008e+07	843928952	2.212e+08	2.40152e+08	1.9012e+08	1056546427	6.8016e+07	0.0324406	0.169255	3.71642
M328T169_NEG	Octanoic acid, 4-[(1-oxo-7-phenylheptyl)amino]-, (4r)-	6.7352e+08	1100147324	1.61566e+08	2.14774e+08	1141373314	390710657	1.91225e+07	2.35101e+08	9.97167e+07	9.93132e+06	2.65824e+06	1.83388e+08	0.0161892	0.126113	4.22693
M281T105_NEG	Oleic acid	3.52508e+08	8.93582e+08	6.20469e+08	598896475	4.00815e+08	3.30666e+08	4890405627	3334128226	1833134745	1018629252	7099785804	980614521	0.0236628	0.146664	9.7487
M255T52_4_NEG	Palmitic acid	3063532110	3739139978	2127982817	2547583946	2823542401	3073077894	4550815454	7316996728	5432583446	8463250693	14993699701	4115960242	0.0203049	0.137046	13.3077
M234T77_NEG	Pamidronic acid	9.80992e+07	9.33408e+07	1.60212e+08	2.93689e+08	1.20881e+08	1.85052e+08	1.54871e+07	1.21097e+07	2.31274e+07	1.83513e+07	1.20385e+07	1.44285e+08	0.00899806	0.100228	2.18072
M218T290_2_NEG	Pantothenate	3448050427	3121230296	4293455210	1957400880	2370249951	9.72614e+08	5.9183e+08	2.84722e+08	8.80818e+08	4.16852e+08	1.55024e+08	2839038745	0.0156862	0.123789	8.06424
M845T164_NEG	Pc(17:1/9-hode)	8.03645e+06	6.5053e+06	610796	6.38732e+06	1.79546e+06	1.30665e+07	2.14519e+08	136926323	9.25531e+07	6.89106e+07	1.52492e+08	1.08423e+07	0.00432084	0.0760233	2.04852
M743T170_NEG	Pe 36:2	7.52433e+07	3.61959e+07	3.38339e+06	8.26084e+07	1.54986e+07	7.5251e+07	304020910	142966839	131493721	2.08544e+08	4.01862e+08	4.90293e+07	0.0152361	0.122801	2.40585
M298T231_NEG	Pectolinarigenin	6.63966e+07	5.16371e+08	7.68527e+07	4.71059e+07	1.50942e+08	4.16003e+08	7.75039e+08	742298298	6.89313e+08	5.65074e+08	1141366967	2762370023	0.027486	0.156936	5.56285
M212T179_POS	Pendimethalin	68782304	1.36595e+08	2.19791e+08	3.90173e+08	1.82785e+08	1.72494e+08	9.31988e+06	2.37979e+07	1.16011e+07	1.61797e+07	1.22616e+07	9.55326e+07	0.00478973	0.0786624	2.59631
M722T52_NEG	Pg 32:0	6.59573e+06	4.18797e+07	3.5868e+07	2.29886e+07	8.72535e+06	9.73783e+06	5.03956e+08	4.09697e+08	1.03431e+08	4.26187e+08	4.40446e+08	5.49008e+07	0.00327682	0.0692713	3.58486
M748T51_NEG	Pg 34:1	1.36973e+07	9.40934e+07	1.70592e+08	1.216e+08	1.06016e+08	5.58941e+07	5.51327e+08	3.5118e+08	1.97883e+08	4.85148e+08	5.52109e+08	2.23853e+08	0.00142128	0.051785	3.65408
M244T347_2_POS	Phencyclidine	1.24594e+08	4.94664e+07	2.87224e+08	1.20271e+08	1.7129e+08	1.73752e+07	212572	8.36661e+06	5.32304e+06	615383	2.58268e+06	4.2139e+06	0.00955209	0.102901	2.19817
M145T408_NEG	Phenylacetyl-l-glutamine	1.90005e+07	7.11039e+06	1.00452e+07	5.01105e+06	2.92766e+07	1.15951e+07	4.69102e+08	5.66935e+07	1.73939e+08	3.95976e+07	230987258	5.55647e+07	0.041924	0.18986	2.12498
M164T207_NEG	Phenylalanine	1.75774e+08	3.08698e+08	1.91283e+08	1.98029e+08	1.7274e+08	1.0596e+08	2.28127e+07	4.68289e+07	3.20412e+07	2.21473e+07	1.39385e+07	132613684	0.00108191	0.0468875	2.44095
M168T128_2_POS	Phenylephrine	2.57264e+08	1.56614e+08	2.09411e+08	3.71097e+08	4.33353e+08	5.04403e+07	1.02238e+08	4.18109e+07	4.12081e+07	6.23192e+06	3.55891e+06	1.44666e+07	0.00510347	0.0803855	3.0518
M582T218_2_NEG	Phosphatidylcholine lyso 18:0	2.20645e+07	1.01904e+08	8.72912e+06	4.17113e+07	1.38162e+07	107571150	3.81907e+08	5.00526e+08	3.80284e+08	353711443	4.15448e+08	1.55409e+08	9.02e-05	0.0205935	3.90205
M318T70_2_POS	Phytosphingosine	587834627	7.84062e+08	8.16409e+08	1022856033	7.19336e+08	6.06289e+08	9.1674e+08	9.29763e+08	8.83218e+08	8.65203e+08	9.37117e+08	9.19425e+08	0.0441639	0.194568	2.18488
M355T60_NEG	Pioglitazone	2.91325e+08	3.69317e+08	383618199	1.63971e+08	3.09563e+08	3.34503e+08	1.93132e+07	4.62424e+07	5.76453e+06	7.2307e+06	1.94921e+07	2.56434e+08	0.000656645	0.0401856	3.22927
M415T207_1_NEG	Propanoic acid, 2-[[4-[2-[[(cyclohexylamino)carbonyl](4-cyclohexylbutyl)amino]ethyl]phenyl]thio]-2-methyl-	282306106	3.6488e+08	6.17324e+07	7.62095e+07	9.66214e+07	2.50671e+08	8.90006e+06	3.18241e+07	1.692e+07	1.59131e+06	1.97114e+06	1.0384e+08	0.0140918	0.119234	2.30099
M73T178_NEG	Propionic acid	562828731	9.8451e+08	1869176783	8.23017e+08	7.34325e+08	1.21713e+08	1.01994e+07	1.26883e+08	1.33188e+08	1.24069e+07	6.72951e+06	1.05129e+07	0.00730825	0.0920708	5.37757
M302T147_2_POS	Pro-Trp	5.83454e+08	5.76584e+08	1160999365	8.32985e+08	6.00868e+08	195961734	5.96837e+07	9.93741e+07	2.29126e+08	1.75617e+08	1.28069e+08	6.26014e+08	0.0182636	0.132008	3.93468
M398T423_NEG	Quinacrine	2.54724e+08	1.88551e+08	1.71344e+08	813620	1.86683e+08	6.73898e+07	1.16936e+07	2.23409e+07	2.76737e+07	1.22085e+07	1.47357e+07	6.81667e+07	0.0122489	0.113463	2.07294
M122T236_NEG	Quinolinate	2636802615	2194987590	1188487107	1313189628	1167827098	5.45263e+08	1057361969	2.51094e+08	5.16981e+08	3.28827e+08	293553943	1408645541	0.0408856	0.187521	5.31583
M182T31_1_NEG	Saccharin	4924286300	2.03003e+08	2144321998	966191113	3868822384	1.09356e+07	6.37846e+07	1.70982e+06	4.67213e+07	1.66304e+06	1.27417e+06	2.79043e+07	0.0357585	0.177137	8.6487
M123T329_1_POS	Salicylaldehyde	4.85804e+08	3.72698e+08	741587840	4.68877e+08	406532256	1.23609e+08	3.39018e+07	5.57826e+06	1.0618e+08	2.36366e+06	2.334e+06	1.21496e+08	0.000995911	0.0467603	4.14192
M380T139_NEG	Sinefungin	2.55125e+08	3.54479e+08	1.53939e+08	108461	116012588	6.25918e+07	548318	5.96169e+07	1.43315e+07	1.00656e+07	2.86368e+06	1.30487e+07	0.0257168	0.152876	2.03283
M282T100_2_POS	Sphingosine	6.21763e+08	2366414436	2149464825	2607601731	7.71679e+08	7.61607e+08	3.47601e+08	1.69185e+08	1028033936	2.65489e+08	1.98383e+08	1061427000	0.0310008	0.165675	5.62689
M111T183_POS	Suberic acid	9.51265e+07	5.52131e+07	4.12848e+07	2.16458e+08	94229835	1.44769e+08	791428	4.57842e+06	1.92901e+06	6.66707e+06	3.57131e+06	5.66834e+06	0.00270689	0.0660327	2.13339
M101T382_NEG	Succinic semialdehyde	3.54803e+07	3.87598e+07	5.77918e+07	1.86919e+07	2.89367e+07	2.64105e+07	2.07505e+08	2.14491e+07	1.19127e+08	2.26035e+08	2.57042e+08	6.38993e+07	0.0152563	0.122801	2.06564
M372T343_2_POS	Tamoxifen	1.00901e+08	3.13731e+08	1.03388e+08	3.37359e+07	3.79728e+08	572898680	2.24829e+07	2.02712e+07	3.81157e+07	1.76349e+07	1.17317e+07	1.65617e+08	0.042605	0.191345	2.42893
M322T333_NEG	Tazarotenic acid	5.9642e+08	6.6846e+08	1.48536e+08	530872	1.65573e+08	1.08677e+08	1.23175e+06	2.10638e+07	1.01862e+07	9.78382e+06	3.99818e+06	3.12851e+07	0.0402298	0.186372	2.76814
M409T65_1_NEG	Tephrosin	1.48931e+07	3.36387e+07	8.07222e+07	2.02159e+06	6.16976e+06	7.69682e+06	1.77374e+08	1.8359e+08	8.08211e+07	1.61787e+08	2.04086e+08	1.01251e+08	0.000293192	0.0307422	2.47926
M165T39_NEG	Terephthalic acid	1.87012e+08	4.33342e+07	9.34767e+07	6.60192e+07	2.3932e+08	4.75781e+07	6.44161e+06	1.21171e+07	3.49733e+06	2.10195e+06	536700	5.14219e+07	0.0150646	0.122384	2.01444
M181T78_POS	Theobromine	1.76781e+08	2.21056e+08	3.21909e+08	3.21092e+08	2.22948e+08	5.16361e+07	8.23153e+06	1.66866e+07	7.07913e+06	1.46492e+07	1.18914e+07	3.16514e+07	0.000585548	0.0385335	3.00584
M359T411_NEG	Thieno[2,3-b]pyridine-5-carbonitrile, 6,7-dihydro-4-hydroxy-3-(2'-hydroxy[1,1'-biphenyl]-4-yl)-6-oxo-	2.92296e+06	8.81591e+06	486771	5.69137e+06	5.20207e+06	2.52416e+06	2.04547e+08	1.63924e+07	5.90691e+07	2.72191e+08	417151869	2.14834e+07	0.0349511	0.1749	2.36558
M258T179_2_POS	Tolmetin	15231599	1302551908	521579891	7.55689e+08	1.84714e+08	1.19609e+08	515537	1.0479e+07	136787	4.14643e+06	227344	1.58407e+07	0.0371561	0.180474	3.54422
M877T41_POS	Triacylglycerol 16:0-18:1-18:1	5.82713e+07	7.13896e+07	1.50689e+08	4.28541e+06	2.85849e+07	1.24391e+07	3.4442e+08	6.18381e+08	3.20891e+08	7.05142e+08	627196495	8.92616e+07	0.00258429	0.0647224	4.18805
M167T61_NEG	Uric acid	2.66159e+08	1.16988e+08	1.06534e+08	6.01247e+07	8.45973e+07	3.79268e+07	3.82322e+06	8.07018e+06	5.23115e+06	1.62224e+06	858587	3.09609e+07	0.0111341	0.109422	2.00253
M542T214_POS	Vinblastine	1.59362e+07	5.41082e+06	807044	6.16773e+06	662585	2.12519e+07	1.64929e+08	6.46826e+07	9.55832e+07	1.39324e+08	1.50936e+08	1.39023e+07	0.00241645	0.0632927	2.00073
M285T76_1_POS	Wogonin	4.3319e+08	3.52306e+08	1.59731e+08	5.53811e+07	1.55535e+07	3.08743e+08	7.66849e+06	1.78965e+07	1.4261e+07	6.39351e+06	4.46197e+06	8.92235e+06	0.0122668	0.113517	2.68224
M319T250_2_POS	Zearalenone	8.40892e+07	9.93449e+07	5.15181e+07	1.33374e+08	159129562	2.25585e+08	4.9957e+06	1.34345e+07	5.63933e+06	6.39636e+06	6.14377e+06	4.99426e+07	0.00173128	0.0574465	2.17401
M235T157_2_POS	Zolpidem	5.97082e+08	4.73917e+08	3.49318e+08	1.93114e+08	3.77704e+08	1.58128e+08	4.49069e+07	6.75792e+07	9.59335e+07	3.14953e+07	2.66239e+07	1.98595e+08	0.00318741	0.0687675	3.39314

## Sheet: Table S7
Supplementary Table S7. Differential fecal metabolites in calves with D3W vs. H3W diarrhea.
ID	MS2_name	H13	H14	H15	H16	H17	H18	D13	D14	D15	D16	D17	D18	Pvalue	FDR	VIP
M305T237_NEG	(-)-epigallocatechin	8.81206e+07	8.58791e+08	1.10892e+08	7.0068e+08	1.94469e+08	6.57599e+07	303795	1.61947e+06	2.77212e+06	4.77861e+07	1.24903e+07	987626	0.0460646	0.235308	3.23633
M495T423_NEG	(1s,4as,7s,7as)-7-hydroxy-7-methyl-1-[(2s,3r,4s,5s,6r)-3,4,5-trihydroxy-6-[(4-hydroxybenzoyl)oxymethyl]oxan-2-yl]oxy-4a,5,6,7a-tetrahydro-1h-cyclopenta[c]pyran-4-carboxylic acid	2.70174e+08	6.08943e+08	2.29124e+08	8.57555e+08	2.37704e+08	3.46433e+08	9.42017e+06	1.07364e+08	4.54531e+07	2.22616e+08	1.91302e+07	7.42289e+06	0.00866532	0.144577	3.68414
M429T51_POS	(2.beta.,3.alpha.,5.alpha.,16.beta.,17.beta.)-17-acetoxy-3-hydroxy-2-(4-morpholinyl)-16-(1-pyrrolidinyl)androstane	2.16805e+08	3.0282e+08	2.24551e+08	3.02841e+08	3.09022e+07	8.22591e+07	2.77804e+07	3.13213e+07	2.54131e+07	4.36665e+07	7.69688e+06	1.58111e+07	0.0047617	0.123858	2.57268
M429T31_POS	(2.beta.,3.alpha.,5.alpha.,16.beta.,17.beta.)-2-(4-morpholinyl)-16-(1-pyrrolidinyl)androstane-3,17-diol	8.41528e+08	1250784557	1004984271	1111624044	1.11212e+08	3.86581e+08	6.46324e+07	8.19408e+07	8.38205e+07	9.50951e+07	1.72481e+07	5.75591e+07	0.00274187	0.110822	5.42069
M493T152_NEG	(2s,3r,5r,10r,13r,14s,17s)-2,3,14-trihydroxy-10,13-dimethyl-17-[(2r,3r,5r)-2,3,6-trihydroxy-5,6-dimethylheptan-2-yl]-2,3,4,5,9,11,12,15,16,17-decahydro-1h-cyclopenta[a]phenanthren-6-one	1110046930	1479109506	1026826928	5.60119e+08	1.85087e+07	3.18145e+08	1.3119e+07	1.81722e+07	5.98165e+07	2.89825e+08	4.08735e+06	1.37085e+07	0.0131286	0.167676	4.9955
M329T49_NEG	(z)-9,12,13-trihydroxyoctadec-15-enoic acid	4.37057e+08	2.70946e+08	3.08784e+08	6.69265e+07	4.34588e+08	4.64745e+08	1001562802	7.58624e+08	4.14677e+08	8.76971e+08	8.98054e+08	1028398943	0.00111878	0.0943337	4.24395
M496T221_4_POS	.alpha.-ergocryptine	445912364	8.78392e+08	2.7189e+08	2.73499e+08	3815639238	444268297	4423879340	5639924952	4237401494	4852820429	3411580181	3191141217	0.000690286	0.0933569	12.3418
M355T245_1_POS	.gamma.-muricholic acid	7.26614e+08	1.28561e+07	1008353362	3.8258e+07	9.83244e+06	376320	3.05409e+08	3083012631	3774701709	1993084666	230275650	1602859562	0.0317699	0.209714	8.19039
M480T213_POS	1-(1z-hexadecenyl)-sn-glycero-3-phosphocholine	1.97805e+07	3.99002e+07	1.71568e+07	2.05045e+07	8.78284e+07	4.06202e+07	6.9481e+07	2.19155e+08	2.16965e+08	1.5548e+08	3.63575e+07	271465570	0.0102405	0.154008	2.31845
M787T170_POS	1,2-dioleoyl-sn-glycero-3-phosphatidylcholine	217251046	7.86611e+08	3.15417e+08	4.31094e+08	1547798154	1.97895e+08	1834648940	1870678987	1839139537	1486173009	1577636210	1665804904	0.000469563	0.0868858	7.21381
M447T82_2_NEG	1,3,5(10)-estratrien-3,17.beta.-diol 17-glucosiduronate	3.18089e+08	1356686472	1249197858	3397103575	1.44072e+08	1111674249	1.01415e+08	1.92988e+08	1.36524e+08	3.38048e+07	2.28451e+07	1.19279e+08	0.0343359	0.213542	6.22373
M281T406_NEG	1,4-d-xylobiose	111790243	1.57171e+08	2.82354e+08	1.15142e+08	2.34856e+07	3.87514e+08	3.04292e+06	893216	6.61557e+06	1.17686e+07	1.1557e+07	7.49494e+06	0.00953652	0.151017	2.59887
M481T26_1_NEG	1.alpha.-methyl-5.alpha.-androstan-3.alpha.,17.beta.-diol glucuronide	2410017191	2713302153	3837620370	3938838086	1011224791	2633785207	1.85406e+08	1081203660	1060205286	8.03111e+08	7.53911e+07	9.42979e+08	0.00143001	0.0954523	9.11134
M432T166_NEG	11,12-dihydroxy-13-methoxy-4,5,8-trimethyl-3-(2-methylpropyl)-1h,2h,3h,4h,6ah,9h,10h,11h,12h,13h,14h,15h,15bh-cycloundeca[e]isoindole-1,15-dione	4.49061e+08	2.70317e+08	4.87664e+08	4.70019e+08	9.8113e+07	1.93849e+08	427117	1.07977e+06	7.92358e+06	2.64515e+07	241272	5.53677e+06	0.000736065	0.0933569	3.69743
M343T329_NEG	13-hydroxy-4z,7z,10z,14e,16z,19z-docosahexaenoic acid	2.33197e+07	2.40575e+08	2.75605e+08	1.8668e+08	8.30297e+07	1.1576e+08	1.34278e+06	1.37092e+06	1.22468e+07	2.0394e+07	7.47982e+06	2.35199e+07	0.00483832	0.123858	2.43069
M510T219_POS	1-heptadecanoyl-sn-glycero-3-phosphocholine	2.11781e+07	4.75335e+07	1.33181e+07	1.74082e+07	1.66288e+08	2.80065e+07	2.28581e+08	2.25992e+08	2.07521e+08	3.36436e+08	1.51923e+08	2.06396e+08	0.000438272	0.0868858	2.80116
M747T173_2_POS	1-hexadecyl-2-(9z-octadecenoyl)-sn-glycero-3-phosphocholine	1.24441e+08	505301978	2.48202e+08	3.77537e+08	194607874	1.8354e+08	1.24201e+08	1.44144e+08	1.53772e+08	6.53248e+07	6.88763e+07	1.28825e+08	0.0254543	0.197117	2.26768
M393T99_2_POS	1h-pyrano[3',4':6,7]indolizino[1,2-b]quinoline-3,14(4h,12h)-dione, 4,11-diethyl-4,9-dihydroxy-, (4s)-	9.86552e+08	6.80863e+08	1.16606e+08	2046958448	1.46972e+08	7.58164e+08	4.25813e+07	1.17942e+08	3.41359e+07	4.55256e+07	4.79554e+07	112123695	0.0314189	0.2093	4.82254
M309T25_1_NEG	1h-pyrrole-3-propanoic acid, 5-[(1,2-dihydro-2-oxo-3h-indol-3-ylidene)methyl]-2,4-dimethyl-	2.58232e+08	2.33093e+08	2.35571e+08	1.11207e+08	603402846	4.76938e+07	1.53693e+06	2.85545e+07	1.40132e+06	2.73725e+07	8.71777e+06	1.50353e+06	0.0132971	0.167676	2.72369
M438T228_NEG	1-lauroyl-2-hydroxy-sn-glycero-3-phosphocholine	3.82778e+08	5.55509e+08	3.61753e+08	1.27782e+08	2.40512e+07	5.09179e+08	1.14459e+07	1.5165e+07	1.38584e+07	9.97202e+07	8.29737e+06	108529613	0.00908356	0.147895	3.33881
M642T143_POS	1-linoleoyl-2-oleoyl-rac-glycerol	2.733e+08	3.04517e+08	3.06972e+08	2.62579e+08	1.415e+08	3.74724e+08	1.12889e+07	2.29698e+07	5.08266e+07	1.62542e+08	1.64329e+07	136192771	0.000478645	0.0875364	3.10606
M707T177_POS	1-myristoyl-2-palmitoyl-sn-glycero-3-phosphocholine	5.45649e+07	9.66613e+07	3.91251e+07	6.95415e+07	202851517	9.23813e+07	3.70387e+08	2.74518e+08	3.63321e+08	4.02328e+08	4.33098e+08	1.17296e+08	0.00127158	0.0943337	3.06275
M767T163_1_POS	1-o-hexadecyl-2-o-(5z,8z,11z,14z,17z-eicosapentaenoyl)-sn-glyceryl-3-phosphorylcholine	6.42722e+06	9.15913e+06	1.49088e+07	1.37349e+07	9.957e+07	9.29582e+06	82095715	1.89661e+08	2.30846e+08	8.3723e+07	8.91135e+07	1.22984e+08	0.00467782	0.123444	2.29013
M733T174_1_POS	1-oleoyl-2-myristoyl-sn-glycero-3-phosphocholine	9.34178e+07	223732155	125687044	101749812	6.6163e+08	1.04309e+08	7.80788e+08	6.70744e+08	9.8067e+08	7.57636e+08	7.20916e+08	2.94402e+08	0.00390746	0.119811	4.54619
M544T219_POS	1-oleoyl-sn-glycero-3-phosphocholine	4.65085e+07	85340330	3.04984e+07	1.76193e+07	208805699	2.5831e+07	1.44231e+08	5.06201e+08	8.32477e+08	4.32165e+08	1.66145e+08	1.63648e+08	0.0243264	0.194044	3.67912
M759T172_1_POS	1-palmitoyl-2-linoleoyl-sn-glycero-3-phosphocholine	2.44933e+08	6.96282e+08	3.38873e+08	439020702	1723317048	1.75431e+08	2298283220	1822342890	1590762478	1348773755	2402540380	1190655140	0.00364689	0.118743	6.68939
M992T221_POS	1-palmitoyl-sn-glycero-3-phosphocholine	2.32404e+06	1.09369e+07	1.2386e+06	1.29067e+06	4.47099e+08	3.4877e+06	6.53354e+08	1025228193	5.99293e+08	8.21375e+08	292593082	2.54153e+08	0.00400343	0.120493	4.86683
M391T57_2_NEG	1-piperazineacetic acid, 4-(phenylmethyl)-, 2-[[2-hydroxy-3-(2-propen-1-yl)phenyl]methylene]hydrazide	3.39911e+07	2.17549e+07	4.48144e+07	3.22731e+07	5.14031e+08	1.11215e+08	1139229873	4407452064	6.94952e+08	1909628908	1.82407e+08	1500475606	0.0328138	0.210499	7.54513
M469T157_POS	1-propanone, 1-[7-(3,4-dimethoxyphenyl)-2,3-dihydro-9-[[(3s)-1-methyl-3-piperidinyl]methoxy]-1,4-benzoxazepin-4(5h)-yl]-	2.5077e+08	2.20785e+08	1.53479e+08	6.44651e+07	3.69057e+06	1.0217e+08	444959	1.80395e+06	1.10095e+06	6.38856e+06	1.09799e+06	8.09949e+06	0.0072044	0.137167	2.19581
M811T165_POS	1-stearoyl-2-arachidonyl-sn-glycero-3-phosphocholine	2.81613e+07	4.72092e+07	3.6831e+07	4.58716e+07	9.61824e+08	2.8953e+07	9.09136e+08	1174133168	1466218765	1124585225	1186278067	5.82171e+08	0.00116859	0.0943337	6.36934
M480T222_3_NEG	1-stearoyl-2-hydroxy-sn-glycero-3-phosphoethanolamine	1.55127e+08	3.52219e+08	1.17059e+08	1.23216e+08	1302659546	2.92088e+08	1767615194	2194384480	1627086823	2078343244	1379948067	1142756683	0.000368209	0.0868858	7.80971
M769T173_NEG	1-stearoyl-2-myristoyl-sn-glycero-3-phosphocholine	1.89776e+07	2.5928e+06	1.80035e+06	1.14387e+06	8.95018e+07	3.23707e+06	2.02274e+07	1.79693e+08	1.72265e+08	8.19532e+07	7.36418e+07	1.15653e+08	0.0124931	0.165257	2.00585
M789T134_POS	1-Stearoyl-2-oleoyl-sn-glycerol 3-phosphocholine (SOPC)	3.28811e+06	783658	3.97818e+06	1.25214e+06	1.44894e+08	4.49944e+06	1.38327e+08	1.17124e+08	2.62711e+08	3.32075e+08	2.2896e+08	5.18584e+07	0.00756778	0.139283	2.46036
M524T218_2_POS	1-Stearoyl-sn-glycerol 3-phosphocholine(LPC(18:0))	5.13944e+08	8.54138e+08	1.78564e+08	2.3345e+08	2615066023	2072163026	2806298248	3788741777	3392191496	3446734246	2554162951	4754452685	0.00109245	0.0943337	10.2059
M495T62_NEG	2-[(6,7-dimethoxy-1,2,3,4-tetrahydroisoquinolin-1-yl)methyl]-3-ethyl-9,10-dimethoxy-5-oxido-2,3,4,6,7,11b-hexahydro-1h-benzo[a]quinolizin-5-ium	7.41446e+07	2.59678e+07	4.91301e+08	5.11688e+08	1.46887e+08	6.9361e+08	931039	156275232	7.85266e+07	1.52358e+07	1.76953e+07	9.84688e+07	0.0463243	0.235713	2.80855
M343T97_2_NEG	2-[1-hydroxy-1-(4-methoxyphenyl)propan-2-yl]oxy-6-(hydroxymethyl)oxane-3,4,5-triol	6.5052e+07	1.90514e+08	338685644	1.045e+08	201206	141577642	385363	1.53795e+07	3.39132e+06	1.55779e+06	5.56579e+06	1.63593e+07	0.0194852	0.184659	2.19563
M275T199_POS	2'-deoxyinosine	1241349682	7.33718e+08	803639749	1.37923e+08	4.6471e+07	3.89598e+08	7.1232e+07	1.95629e+08	3.71062e+07	4.72313e+07	1.30228e+07	1.4054e+08	0.0294506	0.205866	3.78448
M168T139_NEG	2-methoxy-5-nitrophenol	1.73345e+08	4.35012e+08	1.23787e+08	392704347	6.17184e+07	1.94942e+07	2.10124e+06	1.35151e+06	1.37888e+06	4.98866e+07	6.90471e+06	2.39835e+06	0.0234886	0.193115	2.57665
M135T133_NEG	2-methylbenzoic acid	5.22079e+07	1.61604e+08	3.69011e+08	9.62466e+07	1.47011e+08	2.18204e+08	7.51864e+07	1.43537e+07	6.50868e+07	1.56361e+07	8.139e+06	9.34339e+07	0.0225846	0.190371	2.09983
M280T27_NEG	2'-o-methyladenosine	5.97372e+08	4.91489e+08	1606360973	1023018493	5.20358e+08	1105371339	2.18724e+07	102946851	1.30635e+08	4.15119e+08	2.50367e+07	8.45807e+07	0.00237351	0.106676	5.61032
M174T338_POS	3,4-dimethylmethcathinone	2.99585e+07	8.42861e+08	3.2485e+08	190847429	3.12425e+07	6.56583e+08	6.89032e+06	2.16266e+06	4.23908e+06	5.46817e+06	8.85214e+06	6.69702e+07	0.0375559	0.219834	3.40386
M195T286_NEG	3,7-Dimethyluric acid	1.94226e+08	2.2248e+08	2.31727e+08	5.73398e+08	7.77431e+07	1.44313e+08	5.92736e+07	2.39515e+07	1.52387e+07	1.80799e+07	3.34949e+07	1.88068e+07	0.0133313	0.167676	2.79858
M818T245_1_POS	3alpha,7beta,12alpha-trihydroxy-5beta-cholan-24-oic acid	3.29578e+08	2.47424e+06	4.56547e+08	1.08216e+07	2.20838e+06	2.18709e+08	1.35828e+08	1409203863	1733802873	9.42052e+08	9.91794e+07	7.47649e+08	0.0375708	0.219834	5.37923
M277T97_NEG	3-amino-1-propanesulfonic acid	9.92492e+08	447233466	1053645931	3.5112e+08	6.0156e+07	4.00235e+08	6.71088e+07	2.62395e+07	4.49536e+07	2.34325e+07	15185569	1.67763e+08	0.0119809	0.16343	4.16304
M467T156_1_NEG	3'-hydroxyrepaglinide	1592251368	1718428150	1326857123	4.78417e+08	4.0223e+07	5.52692e+08	1.86417e+07	1.98857e+07	6.758e+06	2.41803e+08	7.97136e+06	6.59811e+07	0.0102522	0.154008	5.73747
M521T28_NEG	4-({5-[5-hydroxy-3-({[(2z)-2-methylbut-2-enoyl]oxy}methyl)pentyl]-8a-(hydroxymethyl)-5,6-dimethyl-3,4,4a,5,6,7,8,8a-octahydronaphthalen-1-yl}methoxy)-4-oxobutanoic acid	1345098695	1103292391	3.57989e+08	3.5616e+08	1.36723e+08	9.22946e+07	2.13213e+07	1.73607e+08	6.19188e+07	6.28081e+07	69476913	8.53762e+07	0.0484377	0.239117	3.6648
M442T220_POS	4,4'-methylenebis(2,6-di-tert-butylphenol)	6.68151e+07	1.69232e+08	7.86838e+07	1.83375e+08	6.93997e+06	1.44058e+08	2.09766e+06	7.58898e+06	1.09909e+07	4.72676e+06	467954	8.66838e+06	0.00443749	0.123266	2.052
M182T46_NEG	4-pyridoxic acid	1358890375	2190373533	1107546616	2061370144	2.15466e+08	3.11993e+08	7.94952e+07	6.72179e+07	3.52743e+07	7.85748e+07	5.61278e+08	1.429e+08	0.01391	0.168419	6.31731
M369T31_2_NEG	5.alpha.-androstan-3.beta.-ol-17-one sulfate	6.23787e+08	8.25051e+08	5.75041e+08	1096492322	7.40029e+07	1.9574e+08	2.19639e+07	6.72507e+07	1.98914e+08	7.84146e+06	5.4636e+06	233221368	0.0146162	0.17162	4.05515
M467T83_1_NEG	5-methoxytryptophan	7.22943e+08	6.17359e+08	4.70063e+08	1638996090	1.33503e+08	7.44009e+08	1.669e+07	3.42167e+07	2.42608e+07	7.07564e+07	1.08644e+07	5.81646e+07	0.00752266	0.139145	5.12626
M257T77_1_NEG	6-phosphogluconic acid	128478655	8.55067e+07	339370734	3.24887e+08	5.35184e+07	652807335	386808867	1134922787	742903282	1130522421	2.09723e+08	9.79991e+08	0.0220421	0.189536	4.2641
M166T207_POS	7-methylguanine	1127996856	1651100693	1061124973	1340269576	2.02086e+08	6.32684e+08	7.64268e+07	1.05166e+08	1.31634e+08	1.45782e+08	8.60181e+07	420525989	0.00308777	0.113538	5.89562
M152T250_POS	Acenapthylene	4.30795e+08	2.84184e+08	133293218	130441134	6.36157e+06	7.34243e+07	7.70733e+06	10590208	6.01622e+07	7.48221e+07	6.70449e+06	3.10711e+07	0.0483852	0.239117	2.00565
M146T402_POS	Acetylcholine	4.80515e+07	3.5552e+08	1164784698	8.93804e+08	7.14204e+07	5.24019e+08	6.39589e+07	9.11053e+07	9.18219e+06	5.03693e+06	6.77277e+06	6.46674e+07	0.0286183	0.204316	4.03057
M194T86_2_NEG	Acridone	1586198137	3578784562	3753403727	8443470152	7.46571e+07	2041416364	4.27033e+07	3.4317e+07	2.87183e+07	6.90321e+07	4.20725e+07	1.30468e+08	0.0220871	0.189536	10.6462
M98T289_NEG	Allyl isothiocyanate	4.85708e+07	9.76375e+07	7.65733e+07	1.37122e+08	6.16955e+08	1.96742e+08	1273660115	1830686218	4.6142e+08	4.93733e+08	1031350037	7.87775e+07	0.0360672	0.216844	4.73733
M145T382_NEG	Alpha-ketoglutarate	4.62428e+07	6.2827e+07	4.58766e+07	4.9487e+07	2.85654e+08	4.43485e+07	8.3316e+08	5.37942e+08	3.96217e+08	1.22901e+08	6.92007e+08	8.01454e+07	0.021179	0.188337	3.41776
M303T50_2_NEG	Arachidonic acid (peroxide free)	7.68482e+08	3.72525e+08	3.26249e+08	2.08231e+08	1195339168	918284929	2853759312	2864006131	2037299670	2555576285	2317592042	5814754525	0.00191023	0.103244	9.74731
M314T193_NEG	Aurantio-obtusin	6.77982e+07	1.44013e+08	3.32655e+08	1.51853e+08	5.66187e+07	4.24257e+08	1.02205e+06	6.7078e+06	850515	1.19637e+07	1.39286e+06	4.37789e+06	0.0103694	0.154587	2.72488
M409T40_1_POS	Beclomethasone	2.65131e+08	1.32755e+08	1.7091e+08	7.11108e+07	3.45949e+08	9.98735e+07	4.59295e+08	3.52032e+08	2.85293e+08	2.28161e+08	5.57899e+08	5.41972e+08	0.0100234	0.152464	2.72066
M139T195_NEG	Benzoic acid, 2-fluoro-	1.05051e+08	5.35764e+08	6.46562e+08	3.42109e+08	5.95906e+07	1.08967e+08	5.05635e+06	7.91851e+06	2.25678e+06	1.31491e+07	3.41496e+06	3.06181e+07	0.0174228	0.17866	3.26162
M306T50_NEG	Benzoic acid, 4-[[(5,6,7,8-tetrahydro-5,5,8,8-tetramethyl-2-naphthalenyl)amino]carbonyl]-	2.79804e+07	3.58695e+06	1.19391e+06	4.36962e+06	1.52227e+07	7.49525e+07	1.45069e+08	5.64732e+07	3.31458e+08	2.43869e+08	2.71059e+07	1.3183e+08	0.0189337	0.182692	2.2854
M118T297_1_POS	Betaine	5.3077e+07	1.06701e+08	5.54074e+07	5.96841e+07	4.37145e+08	5.06501e+07	7.82978e+08	7.51572e+08	6.32322e+08	4.29638e+08	8.70579e+08	4.44464e+07	0.00826236	0.142291	4.18049
M453T58_2_NEG	Biphenylindanone a	7626446494	5117666613	8591740148	14227503942	2875922523	18033631816	1.6506e+08	1899519017	9.6296e+08	2805619699	2.18116e+08	2122964163	0.00679793	0.134997	17.7004
M227T561_NEG	Bisphenol a	6.63539e+07	3.82599e+07	5.42061e+07	7.47073e+06	3.01514e+07	8.4038e+07	4.65102e+08	1.93614e+08	1.33823e+08	1.57335e+08	3.71123e+08	135421244	0.007376	0.137779	2.47115
M241T302_2_NEG	Bisphenol b	1.04686e+08	426659375	4.28714e+08	3.0843e+08	1.70176e+07	6.67082e+07	3.95635e+06	6.40211e+06	2.47985e+06	8.18966e+07	1.13693e+06	4.93986e+06	0.0217389	0.189536	2.75699
M468T423_NEG	Bucladesine	1.35195e+08	2.6394e+08	1.29904e+08	4.51691e+08	8.91181e+07	1.37247e+08	4.81179e+06	3.99012e+07	2.21088e+07	9.34187e+07	7.2885e+06	2.11934e+06	0.0130735	0.167676	2.51743
M87T120_NEG	Butanoic acid	2387073109	3954660072	9237104160	9323060180	2260076588	6333289508	4.89914e+08	2119785299	1470840237	2505459713	3.58763e+08	1966729792	0.0132134	0.167676	12.2219
M171T54_NEG	Capric acid	2.24037e+08	4.27809e+07	1.41392e+08	3.24713e+07	4.72464e+08	6.264e+08	1337692470	5.9861e+08	9.0907e+08	1024441710	1836220180	4.14962e+08	0.00816088	0.142291	4.87156
M236T96_NEG	Chicoric acid	6.04399e+08	7.0013e+08	2.22736e+08	1133959814	7.69925e+06	4.76031e+07	690733	5.46192e+06	7.84111e+06	3.37524e+06	584364	1.86261e+06	0.031015	0.209064	3.81313
M465T25_2_NEG	Cholesteryl sulfate	13395005327	10404740086	14579159687	13776246008	5216315347	19610700479	2262887777	3458640775	5198623984	8105049655	1302770565	7384408254	0.00448811	0.123311	18.0124
M104T301_2_POS	Choline	8.26915e+08	1406892408	961077948	5.65152e+08	3368438766	1526349115	6091286337	8788732683	3684439488	4269058937	3412902926	5341029047	0.00189795	0.103218	13.0331
M317T250_2_NEG	Coenzyme q2	1.65685e+08	1.24506e+08	267004815	507545688	4.52743e+06	234290048	4.86558e+06	4.64677e+07	4.56258e+07	4.06464e+07	518397	4.40045e+07	0.0230784	0.191644	2.5163
M114T189_3_POS	Creatinine	4.94635e+08	9.1843e+08	1.86633e+08	240577212	7994783682	9.1774e+07	5790160860	3737092006	3979566736	5994268872	4115438459	11161012487	0.0360554	0.216844	11.1467
M367T96_1_NEG	Curcumin	1.22096e+07	1.30737e+06	12896558	1.04004e+07	326154	3.16137e+07	1.15348e+07	3.44438e+08	5.07283e+07	1.38817e+08	1.17702e+08	1.88758e+08	0.0220434	0.189536	2.16661
M263T113_NEG	Dapsone hydroxylamine	7.65024e+08	3.40023e+08	8.66241e+08	4.0709e+08	3.10974e+07	3.73476e+08	4.15277e+07	1.89405e+07	2.13174e+07	1.50431e+07	6.21562e+06	7.27615e+07	0.00598927	0.129751	4.04501
M468T225_POS	Delsoline	2.20508e+07	3.57206e+07	9.49961e+06	7.97622e+06	1.04644e+08	1.58275e+07	3.03949e+08	2.92757e+08	1.40358e+08	3.24474e+08	1.51058e+08	2.45152e+07	0.0067648	0.134679	2.56944
M266T251_NEG	Deoxyguanosine	4.50581e+08	3.01888e+08	1.1985e+08	9.55699e+07	5.2213e+06	6.59009e+07	3.68818e+06	5.85999e+06	8.19596e+06	1.48291e+07	746502	2.4978e+07	0.0391671	0.222566	2.18839
M141T329_POS	D-erythro-imidazolylglycerol phosphate	7.21507e+08	7.09873e+08	2094172061	3144932348	7.00318e+07	1334671706	2.91591e+08	1.23729e+08	1.35163e+08	2.21456e+08	2.35436e+07	212131119	0.0275068	0.200889	6.37658
M199T52_NEG	Dodecanoic acid	3.68399e+08	1.28512e+08	3.59696e+08	8.76107e+07	5.75128e+08	9.5867e+08	1053628446	6.40143e+08	7.4201e+08	9.92765e+08	1167459525	8.5988e+08	0.00918504	0.148233	3.91797
M301T28_NEG	Enterodiol	1049008613	1159679030	4.66581e+08	156753492	3.98359e+08	76803450	3.22826e+06	3.21637e+07	1.04991e+07	4.45048e+07	1.48255e+07	1.55918e+07	0.0167968	0.176497	4.17727
M495T56_NEG	Enterostatin human	6.08444e+08	5.048e+08	7.09369e+08	8.13301e+08	2.29592e+08	1004909394	3.97719e+07	1.90761e+08	1.05104e+08	251083671	2.42287e+07	127916478	0.00104745	0.0943337	4.72348
M160T409_POS	Ethcathinone	3.2247e+08	3.38585e+08	750716757	198216165	1.28573e+07	7.41894e+08	7.07415e+07	2.92079e+07	3.03427e+07	2.25323e+07	7.70631e+06	1.35877e+08	0.0184494	0.180862	3.54431
M385T51_NEG	Eudesmin	8.49932e+07	9.03362e+07	1.46964e+08	3.68566e+08	6.58111e+07	3.86839e+08	4.98669e+06	9.31828e+06	1.14133e+07	1.1713e+07	7.26761e+06	3.52947e+07	0.0149319	0.172892	2.56205
M585T36_NEG	Fahfa 38:4	6.24313e+07	1.62645e+07	3.10509e+07	3.07516e+07	171242747	2.2962e+08	2.70539e+08	3.02018e+08	105657209	2.71902e+08	3.37203e+08	3.49397e+08	0.00502607	0.125132	2.45951
M304T97_NEG	Fenoldopam	2.33971e+08	1.89649e+08	268027774	8.27056e+07	2.12107e+07	155387218	2.64782e+07	1.08502e+07	1.69675e+07	9.23878e+06	6.55018e+06	7.71291e+07	0.00688324	0.135325	2.26312
M434T423_2_POS	Fluvastatin	4.51817e+08	1090211347	3.20063e+08	1603513159	2.59229e+08	4.80409e+08	8.33996e+06	1.03091e+08	4.1259e+07	2.18432e+08	3.11763e+07	9.67126e+06	0.0165057	0.176497	4.78337
M461T65_NEG	Forsythoside e	2.69102e+08	1.1227e+08	4.13894e+08	1.78614e+08	1.23318e+07	5.24293e+08	2.40185e+07	5.22542e+07	1.43293e+07	17514804	2.10143e+07	2.72695e+07	0.0163204	0.176497	2.83742
M553T27_NEG	Ganoderic acid h	2.52004e+08	2.93294e+08	2.25403e+08	2.50913e+08	6.46915e+07	1.53898e+08	3.07624e+06	9.32005e+07	1.03938e+07	3.67447e+07	1.23057e+07	1.41952e+07	0.000666755	0.0933569	2.74367
M262T121_NEG	Gemcitabine	1.74664e+08	7.82278e+07	7.54815e+07	1.38927e+08	2.25344e+07	3.47202e+08	5.54988e+06	3.12924e+07	8.97451e+06	9.76363e+06	2.04695e+07	1.72684e+07	0.0249273	0.195664	2.04402
M171T102_NEG	Glycerol 3-phosphate	2182361189	2472755977	3402840523	5587961441	5.84084e+07	1945094428	2.07941e+07	2.17931e+07	2.77341e+07	9.98712e+07	1.72836e+07	5.1689e+07	0.00625855	0.131421	10.0669
M166T178_NEG	Guanidinoethyl sulfonate	1249417403	5537790200	1202122062	5245934322	1097219632	4022251693	1.73686e+08	2.16466e+08	854242	585133192	7.30255e+07	3.54961e+08	0.00869908	0.144577	10.6242
M288T151_POS	Heptadecasphinganine	593213532	4.66049e+08	1309415568	6.18177e+08	4.53579e+06	3.03137e+08	6.21743e+06	6.58362e+06	5.70614e+07	6.73645e+07	4.57978e+06	1.06637e+08	0.0175066	0.178678	4.22507
M241T97_2_NEG	His-ser	3288514149	3044761859	3470865215	1441226718	1.89888e+08	1724797051	1.43009e+08	8.89618e+07	1.18705e+08	6.26198e+07	3.16656e+07	5.61834e+08	0.00351853	0.118247	8.98933
M154T434_NEG	Histidine	3.25698e+07	4.20107e+06	8.029e+06	4.13445e+06	1.66634e+08	4.53061e+07	1101257484	5.3973e+08	5.75966e+07	5.06303e+08	1645723780	5.00273e+06	0.0433438	0.230568	3.65884
M137T186_2_POS	Hypoxanthine	1.59546e+07	2.51736e+08	573961477	4.14074e+07	1776477115	1713178266	1606355729	3460965583	2209763062	2323539236	1046057122	1134961754	0.0320771	0.209927	6.92296
M227T113_2_NEG	Ile-Pro	2160809935	1868356823	2478185432	1332646458	7.67759e+07	1198410336	7.77096e+07	6.70527e+07	4.64349e+07	34598374	1.26955e+07	2.35411e+08	0.00214801	0.104042	7.70067
M288T29_NEG	Imazethapyr	2.18324e+08	1.61899e+08	3.40998e+08	2.94582e+08	9.38228e+07	2.51459e+08	8.06608e+06	2.52304e+07	2.10079e+07	3.28768e+07	6.11444e+06	2.67692e+07	0.000224666	0.0854619	3.05311
M427T68_NEG	Irbesartan	1.55005e+08	2.79386e+08	2.95207e+08	4.98285e+08	5.42468e+07	2.44505e+08	4.56672e+06	1.42033e+07	8.119e+06	1.31809e+07	9.2213e+06	1.95924e+07	0.00261251	0.110275	3.20325
M125T146_NEG	Isethionate	2431537961	8369273407	1.97944e+08	5924609759	1846243685	6785471964	3.3951e+08	6.04225e+08	677863464	6.64346e+08	1.30047e+08	1571362711	0.022069	0.189536	11.306
M419T56_3_NEG	Jasmonic acid	5.36804e+07	7.80187e+07	4.30555e+07	3.09104e+07	1234865373	1002963420	1182517873	3020807622	6.99102e+08	2675140948	5.2182e+08	2366368092	0.0221461	0.189536	6.84499
M356T235_POS	Lappaconitine	1.54546e+08	4.26538e+08	3.40051e+07	4.73929e+07	128172996	4.13145e+08	5.22006e+07	6.22721e+07	1.15809e+07	2.58749e+07	1.58762e+07	5.81578e+07	0.0481525	0.238425	2.26244
M182T309_NEG	L-homocysteic acid	1368694485	1583015941	3839178824	1505496896	6.69357e+08	2682983359	8.26144e+08	7.21721e+08	1059828794	351222435	6.05922e+08	1416800283	0.0455216	0.234656	5.87581
M522T212_2_POS	Lpc 18:1	1.1328e+08	2.81166e+08	3.20248e+07	7.71663e+07	1307189931	2.17696e+07	1628110993	1729479927	2000398720	1656348706	2270621861	3.64027e+08	0.00312912	0.114286	7.33332
M520T214_1_POS	Lpc 18:2	6.98824e+06	3.94714e+07	7.71947e+06	4.6889e+06	1116889714	6.08772e+06	1305484466	1154565805	1256128767	5.15924e+08	1027914974	1.72383e+08	0.0223198	0.189868	5.23002
M251T348_2_NEG	Lucidin	7.05587e+07	8.41592e+07	8.34959e+08	9.69574e+08	1222635864	5.23352e+08	3.67442e+06	7.16735e+06	2.67918e+06	1.80128e+07	6.56106e+06	2.63249e+06	0.0103887	0.154639	4.61307
M145T559_NEG	Lysine	43489194	2.58147e+07	3.60969e+07	9.44489e+06	4.45498e+07	5.67628e+07	6.50881e+08	1.72295e+08	9.37843e+07	1.04469e+08	6.7287e+08	9.66197e+07	0.0467693	0.235992	2.41458
M262T415_2_POS	Methapyrilene	9.40973e+07	117379974	4.25837e+07	2.8161e+08	1.12267e+07	2.50374e+08	7.193e+06	3.66531e+06	2.89353e+06	4.42934e+06	9.94333e+06	1.68239e+07	0.0192472	0.184252	2.13745
M800T245_POS	Methyl (4r)-4-((5r,9s,10s,12s,13r,17r)-12-hydroxy-10,13-dimethyl-2,5,6,7,8,9,10,11,12,13,14,15,16,17-tetradecahydro-1h-cyclopenta[a]phenanthren-17-yl)pentanoate	6.3309e+07	598720	8.88251e+07	1.93987e+06	423470	4.26241e+07	2.59113e+07	273703714	3.421e+08	1.80548e+08	20308465	1.45606e+08	0.0380675	0.220502	2.37738
M95T113_NEG	Methylphosphonic acid	9.91787e+08	1178618133	597692210	4.03992e+08	2.59668e+08	3.2933e+08	8.67104e+07	1.08653e+08	1.02636e+08	2.41424e+08	6.92765e+07	1.57544e+08	0.00954419	0.151017	4.26559
M437T37_POS	Met-Met-Arg	2.1683e+08	1.00459e+08	121929107	6.55722e+07	3.16786e+08	6.53067e+07	3.42002e+08	2.44464e+08	2.09236e+08	1.92477e+08	4.18864e+08	4.51388e+08	0.0237793	0.193768	2.19879
M210T177_NEG	Milrinone	7.77108e+08	3.35857e+08	1270180501	3.47854e+08	1.85511e+08	6.42758e+08	4.90091e+07	7.0793e+07	3.30736e+07	5.3082e+07	2.19897e+07	3.87565e+07	0.00694959	0.135873	4.51698
M204T178_POS	N-acetyl-.beta.-d-mannosamine	6.60758e+07	382303374	274657287	2.24941e+07	3.05863e+06	3.14032e+08	861603	4.58876e+06	97294.1	6.2467e+06	402696	2.9263e+06	0.0272219	0.200537	2.49658
M244T276_2_POS	N-acetyl-d-galactosamine	6.76343e+08	2164837870	2578326600	2354227453	1.46429e+08	2763444373	3.07386e+08	1061999479	3.43742e+08	9.64438e+08	2.50864e+07	2.46022e+08	0.0224073	0.189883	6.73834
M154T165_2_POS	N-acetylhistamine	2.22588e+08	1224557742	4.7621e+08	6.29901e+08	8.87386e+07	7.55479e+08	1.3065e+07	1.31135e+07	5.13464e+06	8.8434e+07	3.86227e+07	1.97589e+07	0.00915246	0.148233	4.6579
M222T60_1_NEG	N-Acetyl-L-tyrosine	4.43271e+08	2.13621e+08	4.31456e+07	4.03919e+08	2.14185e+07	3.83696e+08	1.34848e+07	2.12008e+07	4.24718e+07	6.03909e+07	1.12956e+07	4.61581e+07	0.0172763	0.17847	2.73299
M292T322_NEG	N-acetylmuramic acid	1.28539e+08	3.75853e+08	3.54176e+08	213929021	4.07377e+07	9.78688e+07	1.09714e+07	6.06735e+06	7.55546e+06	1.96698e+07	3.22033e+07	5.01562e+06	0.00771448	0.139464	2.74162
M413T37_NEG	Naltrindole	3.1645e+08	4.41414e+08	7.2865e+08	6.22105e+08	1.13015e+08	2.50297e+08	3.56588e+07	1.15857e+08	3.75388e+07	3.22164e+07	2.07351e+07	7.50307e+07	0.00383574	0.119811	3.78068
M439T290_NEG	Natamycin	4.84239e+07	2.10177e+08	2.90695e+08	3.83108e+08	2.28072e+06	9.60869e+07	2.86403e+06	1.67731e+07	3.37158e+06	1.12481e+07	103885	3.06065e+06	0.0211139	0.188169	2.43842
M208T68_NEG	N-benzyloxycarbonylglycine	4.40441e+07	3.51953e+08	485372152	3.22885e+08	8.25072e+06	2.71089e+08	2.35569e+06	1.68627e+06	7.75601e+06	1.39482e+07	859894	1.47078e+07	0.00999682	0.152464	3.08762
M394T60_2_NEG	N-oleyl-leucine	5.81713e+07	3.96853e+07	9.50381e+07	1.3941e+08	8.84433e+07	1.57782e+08	2.89307e+08	4.28307e+07	5.43088e+08	5.1222e+08	3.72835e+08	4.97132e+08	0.00557827	0.126525	3.12749
M196T177_NEG	Norvaline, 5-phosphono-	3.74786e+08	1057361040	5.72065e+07	8.5048e+08	8.45063e+07	1828204570	4.35567e+07	1.51873e+07	4.33399e+06	1.298e+07	5.07471e+07	7.13037e+07	0.0355792	0.216142	4.82302
M245T70_POS	Oxyresveratrol	198907541	9.78206e+07	4.63149e+07	8.26571e+07	1.64264e+07	293725313	5.00161e+06	3.33178e+06	4.96343e+06	4.37655e+06	1.9461e+06	9.01137e+06	0.0198874	0.185281	2.0064
M234T77_NEG	Pamidronic acid	2.91231e+08	1.75832e+08	114948137	5.77212e+08	3.75679e+07	3.16921e+08	9.82656e+06	1.2451e+07	2.07799e+07	3.43049e+06	1.49804e+07	4.01441e+07	0.0130231	0.167676	2.91711
M218T290_2_NEG	Pantothenate	1889404889	3960627515	4917522721	11435870996	9.27426e+08	1802135425	7.99048e+08	7.91435e+08	3.9518e+08	5.57674e+08	4.26994e+08	3.71699e+08	0.0459969	0.235308	10.6707
M434T104_NEG	Paxilline	1.54152e+08	2.88302e+08	2.43638e+08	5.57854e+07	3.89554e+07	3.60651e+08	2.47872e+07	1.04985e+07	2.11927e+07	9.80009e+07	8.51409e+06	8.9945e+07	0.0233539	0.1927	2.33708
M845T164_NEG	Pc(17:1/9-hode)	2.17997e+06	6.61542e+06	2.2277e+06	2.2677e+06	1.12925e+08	1.09738e+06	1.17114e+08	1.08232e+08	1.73171e+08	1.76861e+08	165067576	1.00633e+08	0.000459576	0.0868858	2.28958
M212T179_POS	Pendimethalin	2.97715e+08	2.7548e+08	6.50664e+08	2.37361e+08	2.16944e+07	2.92534e+08	1.17216e+07	1.85722e+07	7.83559e+06	1.26163e+07	6.19494e+06	1.2002e+07	0.00632435	0.131922	3.32604
M722T52_NEG	Pg 32:0	4.67108e+07	1.43394e+07	2.38781e+07	1.32453e+07	2.34436e+08	3.30579e+08	6.61889e+08	7.08548e+08	2.12173e+08	478010386	1.09664e+08	5.87462e+08	0.0126044	0.166032	3.5768
M748T51_NEG	Pg 34:1	2.82141e+08	1.60577e+08	2.93078e+08	4.8096e+07	4.6463e+08	2.32209e+08	8.41839e+08	8.56204e+08	310349736	761395596	2.11769e+08	4.34649e+08	0.0321233	0.209927	3.32235
M537T28_NEG	Phe(benzoyl)-leu-arg	1061981432	6.50795e+08	374479436	4.29455e+08	2.97643e+08	5.90922e+07	1.60973e+07	1.88863e+08	3.46186e+07	8.94752e+07	4.20508e+07	5.66129e+07	0.0171063	0.177824	3.55152
M145T408_NEG	Phenylacetyl-l-glutamine	1.35673e+07	3.83921e+06	2.10676e+07	1.11105e+07	3.58259e+07	2.16048e+07	156976083	9.147e+07	3.72914e+08	160253546	2.54931e+08	4.62222e+07	0.0071879	0.137167	2.54978
M164T207_NEG	Phenylalanine	1.63584e+08	286960697	2.4974e+08	1.99534e+08	3.74942e+07	2.60833e+08	1.34444e+07	2.3762e+07	2.05621e+07	3.46114e+07	1.34667e+07	6.31362e+07	0.00111216	0.0943337	2.76678
M168T128_2_POS	Phenylephrine	8.59948e+07	6.067e+08	2.22472e+08	2.5369e+08	1.30111e+07	1.69834e+08	3.35562e+07	8.08208e+06	6.37759e+06	3.95263e+07	2.75888e+07	1.15029e+07	0.0365127	0.217545	2.67603
M582T218_2_NEG	Phosphatidylcholine lyso 18:0	4.73891e+07	7.7384e+07	1.82137e+07	2.25754e+07	2.56486e+08	2.2333e+08	321774931	3.46659e+08	3.64053e+08	4.92101e+08	1.99857e+08	5.41507e+08	0.00219629	0.104042	3.33323
M97T440_NEG	Phosphoric acid	1416883390	1210307550	1171780084	2715300928	7.91365e+08	8.23918e+08	4.5635e+08	548122026	3.52571e+08	1200863301	4.75002e+08	5.79418e+08	0.037781	0.220212	4.98802
M283T297_NEG	Physcion	3.46131e+08	5.30683e+08	7.18267e+08	4.70329e+08	6.25831e+07	7.78091e+08	7.79994e+07	2.6271e+08	3.32448e+08	373748701	3.06716e+07	7.47458e+07	0.0383317	0.221078	2.9642
M311T47_NEG	Phytanic acid	7.49674e+08	694038812	5.63668e+08	1.72829e+08	2.43999e+08	5.73049e+08	1.27678e+08	1.71869e+08	1.64568e+08	1.94585e+08	2.57977e+08	2.65981e+08	0.0124637	0.165241	3.33299
M838T245_NEG	Pi 34:0	2.08728e+08	8.30247e+06	3.48871e+08	1.01692e+07	3.15726e+06	852975	6.64515e+07	8.49032e+08	9.292e+08	6.05468e+08	4.07817e+07	5.13092e+08	0.0351278	0.214874	4.13557
M73T178_NEG	Propionic acid	3.44913e+08	4.98983e+08	1035642294	1122036023	1.55997e+07	9.17674e+08	7.0863e+06	3.81449e+06	3.56629e+07	4.40633e+07	3.05791e+06	4.43885e+07	0.00543625	0.126525	5.07556
M302T147_2_POS	Pro-Trp	1175511668	1778180429	2256577414	1077452410	9.83926e+07	1.90724e+08	6.69472e+07	1.50077e+08	348866067	1.22877e+08	1.0796e+08	3.66319e+08	0.0282242	0.203042	5.42005
M493T184_1_NEG	Rubranoside a	1.75786e+08	4.74753e+08	2.60103e+08	103303759	2.7502e+07	3.10786e+08	7.84142e+06	1.10362e+07	2.27224e+07	4.58572e+06	266727	1.95462e+08	0.0282213	0.203042	2.56031
M361T314_NEG	Rutinose	6.02049e+07	3.0717e+08	2.65817e+08	1.14697e+08	4.96328e+06	2.7427e+08	5.26707e+06	5.39962e+07	5.5048e+06	4.25566e+07	1.2175e+06	1.58574e+07	0.0172819	0.17847	2.37018
M287T94_POS	Sakuranetin	5.04511e+08	1.62572e+08	1.34502e+08	1.51919e+08	606697	2.63614e+08	1.33817e+06	3.46942e+06	3.93313e+06	1.36867e+07	3.15524e+06	1.42188e+07	0.0179346	0.180137	2.53831
M123T329_1_POS	Salicylaldehyde	210147812	189823080	2.91694e+08	8.95053e+08	1.87869e+07	4.01059e+08	8.33753e+07	3.56928e+07	3.87843e+07	6.33985e+07	7.05652e+06	6.17401e+07	0.0435074	0.230568	3.03769
M101T382_NEG	Succinic semialdehyde	3.43735e+07	4.67045e+07	3.49952e+07	5.31427e+07	1.83644e+08	3.40347e+07	5.00945e+08	3.32094e+08	2.42558e+08	7.98119e+07	414869778	4.98188e+07	0.0244552	0.194455	2.5844
M574T31_2_NEG	Sulfobacin b	6.59664e+08	3.92063e+08	1838436423	1408316282	1.8347e+08	3.1789e+08	2.14097e+07	7.92844e+07	1.92327e+08	8.32751e+07	2.67594e+07	1.99984e+08	0.0294413	0.205866	4.73774
M372T343_2_POS	Tamoxifen	1.82884e+08	2.55051e+08	7.29293e+07	126402171	1.84373e+08	2.58218e+08	3.52086e+07	6.07674e+07	1.63262e+07	1.65984e+07	1.91587e+07	2.46836e+07	0.00054924	0.0883056	2.52811
M181T78_POS	Theobromine	1.49094e+08	1.47729e+08	4.78093e+08	6.20973e+08	4.00792e+06	7.13291e+07	2.40416e+06	2.143e+07	3.01416e+07	5.93057e+06	1.24288e+06	4.68102e+07	0.0476748	0.237516	2.643
M494T222_POS	Tiamulin	7.78672e+06	2.04997e+07	1.01793e+07	9.87962e+06	2.93896e+08	1.26997e+07	2.73644e+08	3.91005e+08	4.53288e+08	393256735	2.84266e+08	2.69812e+07	0.0105219	0.155357	3.20961
M877T41_POS	Triacylglycerol 16:0-18:1-18:1	1.40931e+07	7.04479e+06	5.95417e+06	9.94233e+06	4.68058e+08	7.38557e+07	3.95798e+08	5.42883e+08	4.40621e+08	3.62078e+08	782132369	2.42268e+07	0.0262863	0.198194	3.29701
M111T83_2_NEG	Uracil	4393990457	4498587603	5067837005	7227150281	5539089922	7207380220	3354719839	4895548721	3446597574	4371112002	3733193225	4425451201	0.0190513	0.183265	7.44728
M373T245_POS	Ursocholic acid	2.23407e+08	4.33566e+06	3.08779e+08	1.23719e+07	3.25145e+06	874813	9.61705e+07	9.39063e+08	1192466732	614169969	7.20015e+07	5.00651e+08	0.031796	0.209714	4.57053
M101T96_1_NEG	Valeric acid	986461601	1979891169	8078174720	3811681870	1.10543e+08	8781068004	9.64707e+07	9.77813e+07	1542131715	1.30194e+08	3.94723e+07	1163049847	0.047677	0.237516	10.4154
M542T214_POS	Vinblastine	3.46307e+06	1.34497e+07	3.21064e+06	2.10056e+06	1.64143e+08	918076	168931246	1.38185e+08	1.95425e+08	8.88448e+07	1.42506e+08	7.50768e+07	0.00985762	0.15195	2.07077
M235T157_2_POS	Zolpidem	1.86322e+08	2.95146e+08	3.78272e+08	4.25069e+08	7.84136e+07	5.32366e+08	1.61432e+08	1.93395e+07	2.16547e+07	1.0232e+08	5.02417e+07	3.54365e+07	0.00550255	0.126525	3.27852

## Sheet: Table S8
Supplementary Table S8. Differential fecal metabolites in calves with D4W vs. H4W diarrhea.
ID	MS2_name	H19	H20	H21	H22	H23	H24	D19	D20	D21	D22	D23	D24	Pvalue	FDR	VIP
M429T51_POS	(2.beta.,3.alpha.,5.alpha.,16.beta.,17.beta.)-17-acetoxy-3-hydroxy-2-(4-morpholinyl)-16-(1-pyrrolidinyl)androstane	8.49104e+08	5.28513e+08	1.4093e+08	1.31655e+08	3.64909e+08	1.62229e+08	7.2689e+07	2.38172e+07	6.74267e+07	2.07529e+07	4.77792e+07	6.83912e+07	0.0232227	0.147047	2.90723
M429T31_POS	(2.beta.,3.alpha.,5.alpha.,16.beta.,17.beta.)-2-(4-morpholinyl)-16-(1-pyrrolidinyl)androstane-3,17-diol	2518005357	2176122557	7.39011e+08	8.26586e+08	1606473003	6.0504e+08	2.24521e+08	136726515	2.51056e+08	6.39414e+07	8.85862e+07	2.73743e+08	0.00399078	0.065422	6.4092
M727T166_NEG	(2-aminoethoxy)[2-[octadec-9-enoyloxy]-3-[octadeca-1.11-dien-1-yloxy]propoxy]phosphinic acid	3.32954e+07	5.33118e+06	4.73281e+06	3.28862e+07	2.02894e+07	5.3223e+06	3.54518e+08	9.35241e+07	2.6942e+08	127348207	1.66893e+08	5.25405e+07	0.00655961	0.0816214	2.46065
M329T49_NEG	(z)-9,12,13-trihydroxyoctadec-15-enoic acid	5.17167e+07	2.25073e+08	4.21323e+08	3.42541e+07	1.9401e+08	6.72923e+08	1201726631	6.91461e+08	8.94827e+08	8.94366e+08	6.84717e+08	7.48874e+08	0.000976405	0.0330967	4.91978
M496T221_4_POS	.alpha.-ergocryptine	4.5751e+07	211919800	4.21489e+07	8.4575e+07	3.0039e+08	4.44489e+08	3846367837	1085770460	3729570015	3622208560	4577528401	1499450339	0.000589345	0.0262584	11.0297
M480T213_POS	1-(1z-hexadecenyl)-sn-glycero-3-phosphocholine	4.10789e+06	1.92277e+07	2.88601e+06	1.17917e+07	1.38283e+07	3.58833e+07	5.41485e+07	1.01814e+08	2.52537e+08	7.72856e+07	2.55343e+08	9.6151e+07	0.00719837	0.0852363	2.02934
M436T217_2_NEG	1-(1z-hexadecenyl)-sn-glycero-3-phosphoethanolamine	8.55488e+07	1.98042e+08	2.7514e+07	6.52206e+07	1.63932e+08	1.44314e+08	5.67317e+08	6.97412e+08	9.26861e+08	4.71816e+08	1182876864	4.32786e+08	0.000609944	0.0267967	4.81742
M795T165_POS	1-(1z-octadecenyl)-2-(5z,8z,11z,14z-eicosatetraenoyl)-sn-glycero-3-phosphocholine	3.44821e+06	3.51493e+06	355395	1.77813e+07	1.18195e+07	1.82791e+07	1.88055e+08	1.00003e+08	1.43474e+08	1.42986e+08	1.56084e+08	7.72733e+07	1.92e-05	0.0060147	2.37455
M787T170_POS	1,2-dioleoyl-sn-glycero-3-phosphatidylcholine	197697750	2.74391e+08	8.04471e+07	6.73783e+08	2.89525e+08	6.24241e+08	1596179097	9.36471e+08	1869244281	1812096699	1449971519	6.82907e+08	0.000823747	0.031219	6.45881
M721T176_1_POS	1,2-dipalmitoyl-sn-glycero-3-phosphoethanolamine-n,n-dimethyl	3.24229e+07	1.6094e+07	1.2594e+07	3.94793e+07	1.64787e+07	4.74372e+07	1.71506e+08	9.37889e+07	1.30985e+08	7.85495e+07	1.70933e+08	1.22911e+08	0.000130613	0.0129114	2.07413
M481T26_1_NEG	1.alpha.-methyl-5.alpha.-androstan-3.alpha.,17.beta.-diol glucuronide	2054436584	1990380107	1208630315	1937812009	2258093412	1791512640	7.89222e+08	5.67949e+08	7.39127e+08	5.70666e+08	9.18958e+08	8.11756e+08	2.8e-05	0.00692624	6.92387
M299T58_2_NEG	13-hydroxy-9z,11e-octadecadienoic acid	3938765515	8089007908	17516058636	3784701028	3470093906	22640438158	35085789598	34481098915	32656614124	20723220833	35067379389	32283278736	0.000303295	0.0200429	29.6332
M510T219_POS	1-heptadecanoyl-sn-glycero-3-phosphocholine	4.10748e+06	1.40315e+07	3.34993e+06	6.83628e+06	1.77006e+07	3.34287e+07	2.15346e+08	7.90789e+07	2.69643e+08	2.50918e+08	2.84702e+08	112949731	0.000333256	0.0211228	2.83565
M438T228_NEG	1-lauroyl-2-hydroxy-sn-glycero-3-phosphocholine	5.47149e+08	5.85536e+08	9.91886e+07	3.76304e+08	2.61734e+08	2.88823e+08	7.95781e+07	1.18243e+08	4.30352e+07	2.08946e+07	9.98708e+07	1.2064e+08	0.00457552	0.0696009	3.05937
M707T177_POS	1-myristoyl-2-palmitoyl-sn-glycero-3-phosphocholine	2.11079e+07	1.95335e+07	8.78852e+06	3.64314e+07	2.61612e+07	1.21915e+08	5.24236e+08	3.35822e+08	3.99572e+08	2.23865e+08	6.05469e+08	3.48358e+08	9.62e-05	0.0115543	3.95474
M767T163_1_POS	1-o-hexadecyl-2-o-(5z,8z,11z,14z,17z-eicosapentaenoyl)-sn-glyceryl-3-phosphorylcholine	3.61216e+06	4.13262e+06	4.34573e+06	6.02683e+07	3.50925e+06	5.8403e+06	2.53099e+08	9.94335e+07	189295766	1.7163e+08	1.53616e+08	4.18984e+07	0.00134146	0.0384174	2.35797
M733T174_1_POS	1-oleoyl-2-myristoyl-sn-glycero-3-phosphocholine	7.91989e+07	6.07246e+07	2.21003e+07	1.045e+08	7.51404e+07	1.34593e+08	6.80917e+08	3.94917e+08	5.32403e+08	5.13948e+08	8.42195e+08	3.36801e+08	0.00012163	0.012691	4.50577
M759T172_1_POS	1-palmitoyl-2-linoleoyl-sn-glycero-3-phosphocholine	2.71007e+08	3.15942e+08	5.73384e+07	3.89978e+08	3.85493e+08	1.80743e+08	1846791256	7.04312e+08	1513910000	2191153864	1669239298	6.49118e+08	0.00121434	0.0374492	6.9187
M602T31_POS	1-palmitoyl-2-oleoyl-3-linoleoyl-rac-glycerol	1.1e+07	1.564e+07	2.06767e+07	1.45294e+07	1.09148e+07	8.70156e+07	2.21391e+08	8.86042e+07	1.04487e+08	1.03171e+08	1.27591e+08	1.98364e+08	0.00127973	0.0380485	2.1475
M992T221_POS	1-palmitoyl-sn-glycero-3-phosphocholine	152699	759464	1.41134e+08	5.67014e+06	1.87854e+06	2.07058e+06	4.49856e+08	1.85732e+07	3.90115e+08	3.50778e+08	6.6814e+08	4.4666e+07	0.0179274	0.130791	3.20707
M811T165_POS	1-stearoyl-2-arachidonyl-sn-glycero-3-phosphocholine	1.69011e+07	29747300	3.95911e+06	6.96061e+07	3.3647e+07	3.43388e+07	1443848398	3.01125e+08	1327383226	1584457205	1046312794	1.79387e+08	0.00314026	0.0582691	6.1485
M480T222_3_NEG	1-stearoyl-2-hydroxy-sn-glycero-3-phosphoethanolamine	4.77395e+07	1.13096e+08	2.8359e+07	7.60104e+07	1.52757e+08	2.42334e+08	1459707145	5.55264e+08	1911872254	2284317970	2389626988	6.83291e+08	0.00127001	0.0379612	7.62012
M769T173_NEG	1-stearoyl-2-myristoyl-sn-glycero-3-phosphocholine	2.83489e+07	6.34603e+07	1.50492e+06	567333	2.16314e+06	2.82429e+07	1.63321e+08	1.17006e+08	1.02409e+08	8.13438e+07	1.07346e+08	1.26775e+08	8.71e-05	0.0109921	2.04741
M789T134_POS	1-Stearoyl-2-oleoyl-sn-glycerol 3-phosphocholine (SOPC)	725679	408555	2.62859e+07	414937	838528	5.19318e+06	3.53413e+08	1.5305e+07	9.04647e+07	3.94188e+08	2.87512e+08	1.15761e+07	0.0251322	0.152972	2.5505
M343T97_2_NEG	2-[1-hydroxy-1-(4-methoxyphenyl)propan-2-yl]oxy-6-(hydroxymethyl)oxane-3,4,5-triol	4.82721e+08	7.19529e+07	1.82539e+08	3.51269e+08	1.79647e+08	4.03946e+07	497530	7.47691e+06	1.20693e+07	2.48648e+07	4.14868e+06	1.98625e+06	0.0127501	0.111099	2.63138
M783T174_POS	2-oleoyl-1-palmitoyl-sn-glycero-3-phosphocholine	3.15021e+07	8.04914e+07	6.20889e+07	1.39049e+08	1.0805e+08	5.86021e+07	1.45046e+08	3.63606e+08	7.32297e+08	9.90797e+08	9.5696e+08	2.42272e+08	0.00885995	0.093999	4.02922
M588T43_POS	2-sdahpda [dmed-fahfa]	3.63513e+06	6.87908e+06	8.96296e+06	4.62285e+06	2.98797e+06	4.61746e+07	2.47326e+08	8.86791e+07	9.41771e+07	6.87515e+07	2.89453e+08	1.46817e+08	0.00367434	0.0624756	2.34218
M448T88_POS	3-[(cholamidopropyl)dimethylammonio]-1-propanesulfonate	792327	1.55485e+06	1.47313e+06	2.23765e+06	6.30143e+06	1.95003e+07	3.98673e+08	1.80631e+08	1.57348e+08	9.2673e+07	1.59898e+08	4.73857e+07	0.00707244	0.0847088	2.48228
M277T97_NEG	3-amino-1-propanesulfonic acid	603940781	3.72625e+08	7.97028e+08	1085700419	5.81141e+08	4.40099e+08	1.69011e+07	5.01208e+07	6.29617e+07	4.23029e+08	5.20347e+07	2.03641e+07	0.00140453	0.0391675	4.62638
M299T301_NEG	3'-hydroxymelanettin	534420938	5.83993e+08	421624599	712190156	4.77416e+08	5.7657e+08	1.45205e+08	5.46141e+08	4.14867e+08	3.56913e+08	1.52026e+08	5.45958e+08	0.046457	0.201677	2.48743
M521T28_NEG	4-({5-[5-hydroxy-3-({[(2z)-2-methylbut-2-enoyl]oxy}methyl)pentyl]-8a-(hydroxymethyl)-5,6-dimethyl-3,4,4a,5,6,7,8,8a-octahydronaphthalen-1-yl}methoxy)-4-oxobutanoic acid	1887385097	2195656709	6.18127e+08	5.17932e+08	911323246	3.3832e+08	3.61176e+08	2.56495e+08	2.7219e+08	1.29502e+08	1.42194e+08	2.01674e+08	0.0234142	0.147467	4.76578
M369T31_2_NEG	5.alpha.-androstan-3.beta.-ol-17-one sulfate	1.58026e+08	5.77645e+08	9.64702e+07	1.09693e+08	6.31169e+08	520903087	7.1766e+07	1.54797e+08	7.71252e+07	2.01894e+07	3.08426e+07	2.09442e+08	0.0390519	0.184724	2.6519
M129T159_POS	5-methyl-5,6-dihydrouracil	2.00563e+08	1.515e+08	145015476	3.06017e+08	1.6985e+08	3.10195e+08	546079927	4.04821e+08	3.03602e+08	4.80955e+08	3.98843e+08	6.66159e+08	0.00188964	0.0459772	3.06694
M99T118_POS	5-methylisoxazol-3-amine	5.14119e+08	5.21103e+08	8.02914e+08	1162635450	8.68332e+08	1271604001	1546940852	1466265411	1246354604	1158550782	1340029447	1503884027	0.00465131	0.0699541	4.12179
M194T86_2_NEG	Acridone	3425646448	5909190198	5.40387e+07	2509316476	1735518103	2127697294	2.77227e+08	8.55002e+08	3.59997e+08	8.88484e+07	2.26461e+08	4.8498e+08	0.0191751	0.135119	8.03723
M173T81_POS	Arcaine	8.10168e+08	4.04861e+08	2.95854e+07	1.64632e+08	4.84563e+08	4.54126e+07	9.97871e+07	2.42277e+07	5.12333e+06	7.30342e+06	2.4543e+07	1.81103e+07	0.0401333	0.187933	2.74689
M415T37_NEG	Arenobufagin	2.51534e+08	1.95015e+08	5.8193e+07	1.46428e+08	2.26888e+08	4.83471e+07	1.4761e+07	1.74442e+07	3.58956e+07	1.62325e+07	1.34535e+07	2.53266e+07	0.00349661	0.0608348	2.17466
M367T53_POS	Batyl alcohol	2.27106e+07	3.91681e+07	1.24462e+07	5.36508e+07	2.24332e+07	8.37573e+07	3.1323e+08	9.26911e+07	1.09718e+08	1.44848e+08	2.18905e+08	2.36654e+08	0.0023247	0.0508524	2.42469
M306T50_NEG	Benzoic acid, 4-[[(5,6,7,8-tetrahydro-5,5,8,8-tetramethyl-2-naphthalenyl)amino]carbonyl]-	1.40465e+06	2.02115e+07	1.09609e+06	3.257e+06	2.3697e+06	342040365	275826761	3.72497e+08	3.15398e+08	3.33039e+08	4.20653e+08	6.63018e+07	0.0108488	0.103727	2.79274
M399T29_2_NEG	Bonactin	4.21979e+08	1.53652e+08	7.49188e+07	1.78354e+08	1.6043e+08	1.18901e+08	2.84609e+07	3.41643e+07	6.35426e+07	4.34097e+07	1.6889e+07	3.09362e+07	0.0143175	0.11698	2.12927
M115T78_NEG	Caproic acid	3.78353e+08	2.47174e+08	7.43505e+07	2.17012e+08	4.83098e+08	3.59121e+08	8.69066e+08	3.2618e+08	824643301	1787860553	5.05038e+08	6.98164e+08	0.0309347	0.166308	4.16859
M236T96_NEG	Chicoric acid	3.95416e+08	822201809	1.16285e+08	4.78915e+08	9.17983e+08	6.96596e+07	3.79256e+06	1.34093e+06	781715	2.5627e+06	6.98578e+06	2.70152e+06	0.00891722	0.0942541	3.93944
M381T54_NEG	Cholesta-4,6-dien-3-one	4.24608e+08	1.89356e+08	2.92948e+08	2.34611e+08	5.667e+06	6.95607e+06	1.95785e+07	1.11222e+07	2.28332e+07	5.41081e+06	7.03002e+06	2.12913e+07	0.0244365	0.150634	2.25769
M281T50_NEG	Cis-vaccenic acid	3269691037	2816294990	4831422627	2657412885	2740050800	4591913473	15692866449	7369005453	9953767658	12288010279	11231841813	21752322463	0.0010779	0.0349552	19.4995
M485T34_POS	Cyasterone	7.15174e+06	5.94458e+06	3.83988e+07	1.26275e+08	1.77419e+07	1.35069e+07	1.73992e+07	6.45945e+08	8.1076e+08	1339852453	1072532911	2.97574e+07	0.0192608	0.135359	4.27685
M270T238_NEG	Dantrolene	1.19922e+08	2.32999e+08	6.30303e+07	2.25252e+08	2.77893e+08	5.5222e+07	2.06989e+07	9.5405e+07	1.388e+07	3.10779e+07	4.19473e+07	4.79935e+07	0.0142369	0.116603	2.04457
M263T113_NEG	Dapsone hydroxylamine	5.51881e+08	4.24262e+08	6.92879e+08	9.91279e+08	6.63763e+08	3.46066e+08	1.4196e+07	3.84269e+07	1.88084e+07	3.40188e+08	4.49038e+07	1.79988e+07	0.000565902	0.0258862	4.67592
M316T145_2_POS	Decanoylcarnitine	1506890271	1296607088	3.38335e+08	2.30823e+08	2.29474e+08	9.81541e+07	1.59222e+07	5.5658e+07	1.25432e+07	6.23746e+06	1.55728e+07	4.40122e+07	0.0406348	0.188582	3.8027
M325T233_NEG	Derrustone	3.64339e+07	8.41431e+07	1.21475e+07	1.14107e+07	1.10005e+08	5.85689e+08	1.9378e+08	7.31018e+08	1.99455e+08	5.54603e+08	1027747691	1401314322	0.0290606	0.16273	3.83479
M291T199_POS	Disulfoton sulfoxide	2.34818e+08	3.69071e+07	3.19203e+08	1.35265e+08	1.50425e+08	6.78615e+07	4.19451e+06	1.71098e+07	1.85701e+07	109135014	1.34265e+07	2.09064e+06	0.0179821	0.130815	2.01716
M166T285_2_POS	DL-phenylalanine	5.57541e+07	4.75375e+07	1.04044e+07	2.73872e+07	8.60574e+07	2.6197e+07	5.49848e+08	1.24186e+08	5.46372e+08	6.16151e+08	5.62333e+08	234506355	0.000859373	0.0313601	4.08656
M116T335_2_POS	DL-proline	6.39914e+08	4.38594e+08	2.59879e+08	4.04794e+08	6.65279e+08	3.04917e+08	4813157529	1443568300	8.80477e+08	3990599871	4.77701e+08	4944075606	0.0205261	0.138562	8.74289
M481T46_NEG	Fahfa 30:0	1.13949e+07	1.25942e+07	1.07756e+07	1.14739e+07	2.45181e+06	1.02038e+08	1.42399e+08	8.77903e+07	6.99098e+07	1.56975e+08	2.26023e+08	169181179	0.00184855	0.0456216	2.13362
M537T42_NEG	Fahfa 34:0	1.13869e+07	5.26435e+07	5.19134e+07	2.12311e+07	6.58606e+06	2.70758e+08	1484688417	377722035	3.59165e+08	8.11725e+08	1340511410	5.28459e+08	0.00442737	0.0682289	5.42637
M564T36_NEG	Fahfa 36:1	2.60027e+07	6.15431e+07	6.04326e+07	2.97044e+07	6.42797e+06	9.31637e+08	2627924540	2268999531	1227329819	2211780596	3569282235	1863025960	0.000136804	0.0130068	9.40823
M159T186_POS	Fenfluramine	1.4582e+07	8.01268e+06	3.6402e+07	4.52968e+07	2.42269e+07	2.4529e+08	2.72652e+08	3.13806e+08	2.16029e+08	1.77675e+08	2.76567e+08	5.53962e+07	0.0147412	0.118277	2.22215
M304T97_NEG	Fenoldopam	3.18754e+08	1.37751e+08	3.57726e+08	2.98677e+08	1.97567e+08	9.66833e+07	7.0418e+06	2.07351e+07	2.66668e+07	1.13479e+08	1.32538e+07	8.30681e+06	0.00138044	0.0387016	2.79204
M316T321_POS	Flusilazole	2.53478e+08	4.99685e+08	6.72969e+07	1.09726e+08	3.54673e+08	5.01207e+07	5.57785e+07	4.04849e+07	2.15269e+07	2.16806e+07	1.42098e+07	6.86991e+07	0.0310779	0.166596	2.23597
M109T66_NEG	Fosetyl	5.25817e+08	6.20975e+08	6.16892e+08	6.00924e+08	484061338	5.63017e+08	4.84062e+08	3.62449e+08	389294118	6.07435e+08	1.47819e+08	1.55244e+08	0.0213287	0.14083	2.42041
M553T27_NEG	Ganoderic acid h	2.74998e+08	6.11172e+08	1.00706e+08	3.89958e+08	5.0463e+08	3.0296e+08	1.04196e+08	2.00002e+08	7.14852e+07	4.70874e+07	1.96705e+07	5.89434e+07	0.00488978	0.071143	3.15091
M236T179_POS	Gelsemine	6.35741e+07	4.34683e+08	1.71594e+07	1.42511e+08	1.90671e+08	1.61636e+08	2.15622e+06	1.20655e+07	4.21538e+06	82833.7	9.40591e+06	5.49563e+06	0.0209116	0.1396	2.16328
M387T316_NEG	Geniposide	3.32855e+06	5.29297e+07	719684	6.58991e+06	2.88178e+07	169547991	9.91186e+07	1.75106e+08	1.94547e+08	118271846	2.88017e+08	2.2661e+08	0.00484997	0.071143	2.18211
M274T271_2_NEG	Gln-glu	4.00223e+08	8.35367e+08	1.20055e+08	3.83115e+08	7.88391e+08	1.88276e+08	35749664	6.1699e+07	4.77679e+07	6.18507e+07	3.11614e+07	9.82936e+07	0.00892353	0.0942574	3.60943
M325T27_NEG	Hydroquinidine	2.63432e+08	1.46427e+08	3.83409e+08	2.45923e+08	1.89651e+08	2.41517e+08	443484020	2.92295e+08	4.28881e+08	3.50543e+08	3.71555e+08	3.2514e+08	0.0124582	0.110242	2.05601
M230T386_2_POS	Icaridin	5.93159e+08	8.37747e+08	2.1733e+07	3.34404e+07	4.93957e+08	3.00274e+07	1.30373e+07	1.03397e+07	2.12299e+06	2.32432e+06	5.77931e+06	1.70217e+07	0.0474432	0.203908	2.81152
M293T27_NEG	Ile-Tyr	5.54882e+08	1053251985	1.50077e+08	1.95359e+08	842442396	1.7912e+08	4.58167e+07	8.12464e+07	7.12773e+07	2.68854e+07	2.16484e+07	1.19368e+08	0.0205646	0.138696	3.54559
M389T31_NEG	Ilicicolin a	2.20271e+08	3.29227e+08	3.4391e+07	6.65509e+07	3.15916e+08	5.44713e+07	8.75078e+06	4.0673e+06	6.05181e+06	1.52653e+06	3.50976e+06	1.7311e+07	0.0144861	0.117873	2.21871
M202T320_NEG	Indole-3-butyric acid	3.32752e+08	1.5178e+08	1.22995e+08	1.49751e+08	9.2253e+08	2.74883e+08	2.4769e+07	5.30063e+07	8.28038e+06	1.40739e+07	9.19934e+06	3.13124e+07	0.0351616	0.176572	3.00473
M356T159_NEG	Indomethacin	1.22724e+06	1.17337e+07	6.88733e+06	102524	3.78208e+07	534041476	6.17015e+07	8.67398e+08	6.27646e+08	4.40725e+08	686200165	1.29222e+08	0.040339	0.188153	3.01445
M522T212_2_POS	Lpc 18:1	5.82276e+06	8.60334e+07	9.84379e+06	3.63613e+07	8.38769e+07	1.55536e+08	2532889847	1371495932	9.25202e+08	1060783411	1008964283	2.97353e+08	0.00383839	0.0640192	6.58523
M520T214_1_POS	Lpc 18:2	1.08913e+06	1.59872e+07	1.26806e+06	7.90829e+06	1.05297e+07	8.97299e+06	2472572776	3.41144e+08	5.33832e+08	1165734912	3.57471e+08	1.04095e+08	0.0456276	0.199821	5.18084
M476T218_NEG	Lpe 18:2	5.85433e+06	6.93995e+07	4.07955e+06	1.64569e+07	6.33952e+06	2.10165e+07	3.92651e+08	8.12622e+07	7.11854e+07	1.64648e+08	9.43899e+07	9.35954e+07	0.0309416	0.166308	2.1091
M397T29_NEG	Mitragynine	9.72447e+08	3.64935e+08	1.84119e+08	3.71514e+08	533472305	5.55892e+08	9.00719e+07	1.53886e+08	8.12954e+07	7.39595e+07	8.79375e+07	1.70718e+08	0.00586283	0.0768422	3.60548
M234T204_NEG	N-(2,4-dinitrophenyl)-l-leucine	1.61833e+08	3.81829e+08	3.93772e+07	6.89555e+07	2.32972e+08	2.5597e+08	1.37472e+07	1.38468e+07	6.98904e+06	6.79448e+06	1.18747e+07	1.03115e+07	0.00620674	0.0793528	2.38353
M164T70_POS	N,n-bis(2-hydroxyethyl)glycine	8.30495e+06	1.66636e+07	4.23732e+06	1.09606e+07	1.04999e+07	1.04613e+08	2.53144e+08	1.77132e+08	1.80487e+08	1.09243e+08	1.60867e+08	1.97389e+08	0.000103365	0.0119526	2.5545
M386T61_NEG	N-arachidonoyl-3-hydroxy-.gamma.-aminobutyric acid	5.18709e+06	4.59859e+06	9.64199e+06	6.57301e+06	5.75334e+06	3.27302e+07	2.58887e+08	2.69472e+08	1.46894e+08	2.3079e+08	1.7576e+08	5.67224e+07	0.000307674	0.020148	2.68867
M374T62_NEG	N-arachidonoyl-l-alanine	1.30942e+08	2.07108e+07	1.27326e+07	1.23884e+07	8.53299e+06	3.36136e+07	5.52534e+08	5.06778e+08	4.18112e+08	1.93095e+08	4.38857e+08	1.44744e+08	0.000762912	0.0299977	3.64791
M446T88_NEG	N-docosanoyltaurine	7.5033e+06	1.94652e+07	1.06045e+07	1.50752e+07	3.43194e+07	9.31719e+07	1701902424	1078801240	965066937	5.94292e+08	9.55344e+08	316343028	0.000844853	0.0312655	6.03624
M264T347_NEG	Nitecapone	891664	1.98825e+06	2.47673e+07	2.67277e+07	2.42408e+07	1.77279e+07	2.93834e+08	2.67373e+08	3.86378e+08	1.46878e+08	2.11136e+06	6.70795e+07	0.0142383	0.116603	2.3627
M338T105_NEG	N-oleoylglycine	1.39192e+07	1.69371e+07	2.18793e+07	8.67894e+07	3.76333e+07	1.9608e+08	2.19281e+08	161329347	1.53016e+08	1.60994e+08	3.67717e+08	1.51258e+08	0.0112359	0.105416	2.16005
M428T59_NEG	N-oleoyl-phenylalanine	1.16708e+07	4.28533e+07	1.2249e+08	4.72888e+07	4.38615e+07	2.02231e+08	1516088637	1435883416	1394870857	7.55467e+08	1248490653	4.99629e+08	0.000104449	0.0119526	6.63658
M394T60_2_NEG	N-oleyl-leucine	1.80605e+07	5.02751e+07	1.48759e+08	9.35943e+07	5.30177e+07	6.10907e+07	1444212175	3.62824e+08	1640945330	7.15636e+08	3.20825e+08	404193145	0.0110407	0.104544	5.1434
M704T208_2_POS	Palmitoyl sphingomyelin	3.60882e+07	8.03034e+07	1.51008e+08	1.37988e+08	1.56784e+08	1.12945e+08	1173495785	6.288e+08	5.71114e+08	1086167405	1265935649	759787880	6.78e-05	0.00978264	5.92558
M234T77_NEG	Pamidronic acid	4.13657e+08	3.51865e+08	1.14673e+08	6.41871e+08	2.28833e+08	5.29685e+08	1.50147e+07	5.02511e+07	6.17141e+07	2.88851e+07	1.11028e+08	1.13084e+07	0.00194975	0.0463228	3.54152
M845T164_NEG	Pc(17:1/9-hode)	1.33654e+06	2.65397e+06	832944	4.56032e+06	2.9935e+06	6.24165e+06	131805590	3.3314e+07	1.73696e+08	2.18307e+08	1.32386e+08	2.55335e+07	0.00401232	0.065422	2.11504
M743T170_NEG	Pe 36:2	3.54959e+07	2.20148e+06	8.10213e+06	3.67571e+07	2.02202e+07	1.15829e+07	3.59715e+08	7.31699e+07	2.10726e+08	3.53144e+08	2.07014e+08	8.44968e+07	0.00332054	0.0596644	2.80302
M298T231_NEG	Pectolinarigenin	1.75114e+07	1.35505e+08	1.20893e+07	2.13675e+07	1.44812e+08	8.59237e+08	2.2693e+08	1079953474	1073483453	1101148595	1825854968	1894026467	0.00535736	0.0738678	5.72471
M212T179_POS	Pendimethalin	1.34762e+07	1.85323e+06	2.91004e+08	2.42158e+08	1.85163e+08	1.61613e+08	8.68925e+06	3.52868e+07	1.36044e+07	4.74616e+06	6.10658e+06	5.41524e+07	0.0254728	0.15384	2.08654
M722T52_NEG	Pg 32:0	5.8347e+06	2.68811e+06	1.63534e+07	7.42358e+06	9.91676e+06	2.21508e+07	4.38701e+07	4.41966e+07	2.62102e+08	4.9951e+08	1.64614e+08	6.64318e+07	0.0423853	0.192522	2.2137
M774T51_NEG	Pg 36:2	3.02753e+07	1.22748e+07	6.59796e+07	4.12898e+07	6.01901e+07	7.99357e+07	1.17416e+08	6.21009e+07	2.345e+08	378222557	2.82997e+08	8.89932e+07	0.0186098	0.133104	2.18297
M582T218_2_NEG	Phosphatidylcholine lyso 18:0	3.74521e+06	1.73506e+07	9.06631e+06	1.61021e+07	2.80291e+07	1.17586e+08	3.14137e+08	1.52014e+08	5.34609e+08	4.37351e+08	4.54804e+08	2.68504e+08	0.00027586	0.0190725	3.71486
M462T214_3_NEG	Phosphatidylethanolamine lyso alkenyl 18	1.45451e+08	222203982	1.82216e+07	5.28599e+07	1.66228e+08	1.15724e+08	7.74595e+08	5.70189e+08	7.18302e+08	217507904	1064519072	3.59474e+08	0.00303412	0.0577944	4.30446
M515T52_2_NEG	Probucol	9.13163e+08	2371721889	8.22483e+08	5.37918e+08	3.12069e+08	2365929212	7591170904	3009688056	2305602944	3652870503	5636365196	6.52963e+08	0.0369588	0.180468	9.32444
M216T77_NEG	Propanil	1.82425e+08	158824246	5.22212e+07	282826832	1.04416e+08	232117615	7.59191e+06	2.29152e+07	2.57304e+07	1.4033e+07	4.5024e+07	2.04652e+06	0.00157159	0.0420375	2.38097
M271T314_NEG	Quizalofop	1.19651e+07	4.80714e+08	1.50528e+06	3.79895e+08	3.19644e+08	6.32705e+08	6.7655e+08	6.84938e+08	7.05516e+08	5.94366e+08	6.96411e+08	417150828	0.0166498	0.126063	3.19513
M495T271_POS	Schweinfurthin e	1996628008	1183449462	4.03795e+07	2.7109e+08	1578741318	3.87122e+08	9.95936e+07	3.13293e+06	6.04169e+06	3.4332e+06	1.1219e+07	1.22881e+08	0.0231766	0.146925	4.94515
M140T196_POS	Spectinomycin	1.66594e+08	2.86315e+08	2.52015e+08	2.3499e+08	1.84233e+08	7.39931e+07	131083620	5.29255e+07	6.60241e+07	1.05625e+08	3.93934e+07	6.49448e+07	0.00468024	0.0701199	2.02618
M574T31_2_NEG	Sulfobacin b	1187359832	1102576977	6.80175e+08	1411608036	4.45186e+07	1.09501e+08	3.44915e+07	3.47267e+07	1.10098e+08	1.58291e+07	3.35048e+06	2.9843e+08	0.0186584	0.133391	4.55056
M311T27_NEG	Thymol-beta-d-glucoside	2.55079e+08	132650891	320331103	2.209e+08	1.60309e+08	2.14747e+08	4.1821e+08	2.66334e+08	408084114	3.09825e+08	3.207e+08	2.8793e+08	0.0106798	0.102717	2.03307
M258T179_2_POS	Tolmetin	3.10526e+08	1701325770	1.10678e+08	5.78069e+08	9.67895e+08	3.44775e+08	449191	2.35333e+07	4.07345e+06	1.94531e+06	5.41259e+06	6.99845e+06	0.0196917	0.136555	4.41207
M283T50_POS	Trans-vaccenic acid	2.51365e+07	3.01438e+07	9.56074e+06	5.70992e+06	1.59912e+06	1.09731e+08	2.17256e+08	1.66203e+08	108557249	6.3765e+07	2.32275e+08	1.51104e+08	0.00219945	0.0494891	2.1922
M739T99_POS	Triacylglycerol 12:0-12:0-18:1	2.72704e+08	3.95665e+08	6.31452e+07	1.83067e+08	9.75079e+07	5.29546e+07	1.79125e+07	1.04094e+07	2.41743e+07	4.89031e+06	1.03337e+07	2.44579e+07	0.0150946	0.119661	2.17484
M879T41_POS	Triacylglycerol 16:0-18:0-18:1	2.74629e+06	6.85624e+06	2.8881e+06	1.4644e+06	2.99256e+06	172160708	1.60621e+08	3.00825e+08	6.1837e+07	1.17367e+08	1.08711e+08	3.43079e+08	0.0195961	0.136074	2.05946
M402T61_NEG	Undecanamide, n-cyclopropyl-11-(3-hydroxy-5-pentylphenoxy)-	1.22111e+07	4.21625e+07	3.17924e+07	2.06051e+07	3.97027e+07	7.14687e+07	890098145	908267827	7.0843e+08	2.17459e+08	4.09065e+08	2.04395e+08	0.00274817	0.0551262	4.30757
M183T295_POS	7-methyluric acid	1.62022e+07	1.41301e+07	2.56564e+07	1.20105e+07	3.94396e+07	1.63255e+08	3.4164e+08	1.35544e+08	1.62391e+08	1.88469e+08	2.14024e+08	4.68611e+07	0.0148249	0.118479	2.21192
M154T165_2_POS	N-acetylhistamine	4.89854e+08	2399905854	3.45741e+08	8.40202e+08	2631603426	5.7518e+08	3.46038e+07	3.42558e+08	1.9117e+07	1.34277e+07	7.91735e+07	3.7297e+08	0.0300604	0.16473	5.63089
M166T178_NEG	Guanidinoethyl sulfonate	6071783269	3645367229	2.20532e+08	1120868805	1869100517	1450480925	339705241	4.65763e+08	3.99683e+08	1.95496e+08	2.9698e+08	8.28963e+08	0.0470815	0.20314	6.93261
M540T288_POS	Apramycin	2.49409e+08	1.77948e+08	1.20462e+07	7.8462e+07	2.18531e+08	7.7106e+07	2.10575e+07	166445	1.07537e+06	1.03036e+07	1.59322e+06	2.37114e+07	0.00824161	0.0906653	2.00036
M482T225_1_POS	1-hexadecyl-sn-glycero-3-phosphocholine	5.73288e+06	2.32507e+07	4.31174e+06	2.42343e+07	1.89815e+07	1.03015e+08	1.39084e+08	8.81067e+07	1.48575e+08	9.20246e+07	4.20176e+08	158821299	0.0208845	0.139562	2.12843
M546T218_POS	1-stearoyl-2-hydroxy-sn-glycero-3-phosphocholine	1.13182e+07	6.171e+07	1.87327e+07	9.28025e+07	9.37672e+07	4.05573e+08	2.0364e+08	4.88217e+08	2.83549e+08	3.20885e+08	2.01759e+08	460287421	0.0220759	0.143381	2.39886
M524T218_2_POS	1-Stearoyl-sn-glycerol 3-phosphocholine(LPC(18:0))	2.73238e+07	1.49572e+08	4.51815e+07	1.53778e+08	2.43374e+08	1233017620	2907227326	1959471956	4464645802	3959756661	3895111994	2618887019	4.12e-05	0.0075478	11.4202
M87T256_POS	3-methyl-2-buten-1-ol	6.01299e+07	1.97306e+08	5.16813e+08	4.54866e+08	1.24698e+08	3.01574e+07	2.65357e+07	1.54103e+07	1.46919e+07	5.26072e+07	4.47801e+06	1.69045e+07	0.0332986	0.172447	2.53215
M309T49_NEG	Eicosenoic acid	1.09591e+08	9.56823e+07	2.15865e+08	1.14665e+08	6.58484e+07	1.93884e+08	608896280	5.04185e+08	3.29187e+08	2.92111e+08	4.08311e+08	4.16205e+08	0.000249829	0.0185345	3.46438
M281T105_NEG	Oleic acid	4.38787e+08	3.49076e+08	4.67213e+08	3.0341e+08	2.35506e+08	1102905266	3920539834	1368280692	1433240026	2782552241	3045864056	6206610833	0.00532973	0.0738678	9.80524
M183T51_POS	Harmane	1.15857e+08	2.95848e+08	8.96363e+07	1.00707e+08	1.54062e+08	1.34067e+08	3.90199e+07	1.77572e+07	4.71979e+06	3.55754e+06	3.97512e+06	4.66573e+07	0.00235479	0.0512994	2.10273
M412T98_NEG	Solasodine	4.13568e+06	1.4276e+07	5.57725e+06	1.73362e+07	1.66209e+07	5.18543e+07	1536801289	1.17846e+08	849279305	7.0211e+08	5.75216e+08	2.25527e+08	0.010815	0.103467	4.96536
M171T54_NEG	Capric acid	1.21991e+08	2.20337e+08	1.25955e+08	8.55708e+07	1.23718e+08	3.60867e+08	5.96369e+08	2.59487e+08	7.63761e+08	1481899759	6.9118e+08	661069799	0.00730202	0.085446	4.57616
M227T52_NEG	Myristic acid	6.38645e+08	6.48006e+08	5.71611e+08	4.1192e+08	5.23037e+08	1122327322	1457739127	9.80193e+08	1379581650	1314936207	2238708232	2014358530	0.00180666	0.0453192	5.96236
M465T25_2_NEG	Cholesteryl sulfate	15346340738	7542567933	13722033494	16057100218	11269383611	16083448008	8942715610	12190617662	8354454486	6280720719	9517530256	9179934573	0.0227198	0.145111	11.9639
M269T39_NEG	Estrone	1.84657e+08	1.20686e+08	181698739	1.68623e+08	1.46373e+08	2.62248e+08	3.65795e+08	2.98636e+08	2.82087e+08	2.60871e+08	2.41345e+08	2.76093e+08	0.00187861	0.0458802	2.05334
M137T186_2_POS	Hypoxanthine	6.71552e+07	5.37929e+07	1.04562e+08	1.23028e+08	3.0452e+08	2154056408	2996202945	1979561805	1847263413	2167286852	3057438063	4.98212e+08	0.00983623	0.0990549	7.57976
M322T284_NEG	Cytidine 5'-monophosphate	1.99258e+07	2.53444e+07	1.01404e+07	1.97007e+07	3.17093e+07	2.42192e+07	1.90503e+08	4.58899e+07	2.15171e+08	2.19566e+08	1.87435e+08	9.26645e+07	0.000926973	0.0326893	2.3922
M112T215_POS	Cytosine	3.21697e+08	5.80456e+08	5.2873e+07	2.38083e+08	3.9301e+08	179150873	996186738	3640512304	1552594454	1.8068e+08	7.1607e+08	2893899522	0.0325457	0.171082	5.7048
M241T97_2_NEG	His-ser	3741549090	1076262029	3188154357	3191813702	2899856765	1015588033	4.80641e+07	182739136	2.09728e+08	981617305	1.09765e+08	5.17021e+07	0.00113728	0.0359179	9.40928
M111T83_2_NEG	Uracil	5115803525	4550403872	3883187667	5393914215	5642686237	5689857663	6833550233	7664134879	5162745466	7095292093	7192691897	7850160742	0.00274177	0.0551262	8.10049
M187T373_NEG	N.epsilon.-acetyl-l-lysine	7.14643e+07	9.54897e+07	2.22813e+07	1.06296e+08	8.03748e+07	2.87943e+07	1.65528e+08	1.62632e+08	1.92935e+08	2.23417e+08	305230635	1.65349e+08	0.000496867	0.0248739	2.30763
M114T377_POS	Agmatine	9.59172e+08	4.71569e+08	1.46428e+08	396487506	3.67374e+08	111491688	7.56516e+07	1.36002e+08	1.93913e+07	6.91404e+07	1.36093e+08	216435206	0.0407871	0.189066	2.83477
M114T189_3_POS	Creatinine	7.92154e+07	1.6018e+08	1078994414	3.24395e+08	8.79018e+07	2584326721	5817138189	6565415197	5080389476	4461901486	5162888057	9935569299	0.000125804	0.0128484	14.7552
M114T335_NEG	D-proline	7.00565e+07	6.89877e+07	4.59596e+07	7.55681e+07	6.56711e+07	4.16796e+07	2589943392	264809582	1.62478e+08	1445678622	7.62358e+07	1969319902	0.0410636	0.18945	5.68995
M131T377_2_POS	N-acetylputrescine	2463297822	1198956828	3.76398e+08	1025400251	9.52016e+08	2.84966e+08	1.94859e+08	3.52647e+08	4.81543e+07	1.77789e+08	3.467e+08	5.54759e+08	0.0405426	0.188506	4.55091
M206T194_1_NEG	N-acetyl-l-phenylalanine	8.94282e+07	1.38598e+08	3.88334e+07	8.87256e+07	1.85038e+08	1.50858e+07	1.43488e+08	7.15803e+08	4.79918e+08	4.98951e+08	8.47546e+08	3.46458e+08	0.00301278	0.0577745	3.67958
M95T113_NEG	Methylphosphonic acid	5.96422e+08	5.74783e+08	5.64138e+08	7.99304e+08	8.11771e+08	3.77439e+08	9.24085e+07	2.78883e+08	7.3707e+07	1.07308e+08	164617889	2.32014e+08	0.000103092	0.0119526	4.52979
M196T90_NEG	Seleno-l-methionine	5.3264e+07	4.41167e+07	5.60383e+07	2.46517e+07	2.2245e+08	7.8745e+08	1286191535	4.86689e+08	9.34131e+08	1029700948	1151246178	3.32279e+08	0.0065875	0.0817919	5.05133
M204T178_POS	N-acetyl-.beta.-d-mannosamine	1.2437e+08	8.99694e+08	3.5457e+07	278535192	3.6887e+08	3.22304e+08	7.3419e+06	2.93018e+07	1.00576e+07	2.49488e+06	2.1278e+07	1.38607e+07	0.0254322	0.153727	3.00687
M292T322_NEG	N-acetylmuramic acid	3.72432e+08	6.68934e+08	1.59772e+08	2.64022e+08	5.73491e+08	9.64108e+07	1.70069e+08	7.5361e+07	4.01952e+07	4.16204e+07	3.49929e+07	1.34923e+08	0.0173729	0.128393	2.84005
M303T50_2_NEG	Arachidonic acid (peroxide free)	6.16604e+07	2.27185e+08	2.35044e+08	1.38447e+08	1.83019e+08	1709095727	2784588702	1526080864	2895875835	3720400236	2115932332	1644455364	0.000832024	0.0312655	9.13981
M255T52_4_NEG	Palmitic acid	3036101006	1720700978	3524266649	3430286659	2795565294	3304405773	12744970789	4165590143	5722743269	5463486045	10154252975	5596692078	0.0111614	0.105181	12.5949
M199T52_NEG	Dodecanoic acid	2.71004e+08	4.0973e+08	1.94365e+08	1.82156e+08	2.71471e+08	4.27489e+08	7.77919e+08	3.75717e+08	1074093132	1414492277	8.74263e+08	7.16299e+08	0.00306128	0.0580038	4.77868
M425T49_NEG	Lanosterol	5.03781e+08	9.41035e+07	6.15035e+08	6.82116e+08	4.04252e+07	884767	3.51708e+06	464843	1.83956e+07	9.49833e+06	8.15296e+06	1.22127e+07	0.0328528	0.17188	3.08501
M409T175_NEG	.beta.-tocotrienol	1.62889e+07	392846	3.45108e+07	1.09188e+06	7.40748e+06	1.5535e+07	1.80389e+08	9.61964e+07	6.88096e+07	3.96589e+08	5.18981e+07	8.53149e+07	0.0311197	0.166693	2.05198
M735T175_1_POS	1,2-dihexadecanoyl-sn-glycero-3-phosphocholine	9.34864e+07	1.04218e+08	3.47699e+07	2.22584e+08	136829094	4.38358e+08	1353376714	864334318	8.59285e+08	6.01154e+08	9.31289e+08	1172764149	7.4e-05	0.010162	5.80477
M150T313_POS	L-methionine	3.59599e+07	2.08325e+07	5.6714e+06	1.22836e+07	3.11402e+07	1.39816e+07	1.14334e+08	9.60841e+07	1.67251e+08	2.15707e+08	1.1616e+08	5.32321e+07	0.00110516	0.0354013	2.06091
M140T302_POS	Tropinone	5.80501e+08	489061346	8.16982e+08	7.07743e+08	4.64669e+08	5.70477e+08	3.12588e+08	4.94019e+08	3.53345e+08	5.56979e+08	3.29559e+08	5.90012e+08	0.0499844	0.209191	2.22938
M151T230_1_NEG	Xanthine	9.73492e+07	2.62963e+07	3.6894e+07	1.58975e+07	1.8246e+08	7.60264e+08	2527636713	1678677672	7.8541e+08	9.02745e+08	1458313469	4.33844e+08	0.0071258	0.084905	6.31899
M181T78_POS	Theobromine	1.77318e+08	3.20112e+08	1.58875e+08	3.58249e+08	75160121	7.58621e+07	1.67997e+07	2.78985e+07	1.02679e+07	1.86091e+07	5.05003e+06	1.85577e+07	0.00472728	0.0704746	2.50693
M132T420_NEG	L-aspartic acid	2.15214e+07	4.90362e+06	4.42077e+06	2.29057e+06	3.50421e+07	2.1438e+07	2.73043e+08	5.22337e+07	1.49221e+08	2.16961e+08	150219204	1.25617e+08	0.000929326	0.032699	2.50185
M120T285_POS	L-homoserine	3.07446e+07	3.63325e+07	6.75592e+06	1.72645e+07	5.73241e+07	1.55668e+07	3.40181e+08	7.72275e+07	3.40667e+08	3.78552e+08	3.50714e+08	1.46187e+08	0.000873829	0.0315944	3.20984
M218T290_2_NEG	Pantothenate	2010072155	2165921126	5.80513e+08	1454970715	2976274912	1451789062	1267855941	7.79739e+08	9.43111e+08	8.36724e+08	1011099450	1027903369	0.0405234	0.188506	4.58782
M285T259_2_NEG	Androstendione	1082452096	1014083337	5.06303e+07	9.25776e+07	5.41946e+08	1.08559e+08	5.15703e+07	1.55825e+07	2.01142e+06	539925	928801	4.08925e+07	0.0379922	0.182941	3.39318
M227T561_NEG	Bisphenol a	1.03937e+08	3.93967e+07	1.16057e+07	1.01761e+07	2.40601e+07	3.75614e+07	1.23043e+08	2.25795e+08	2.83904e+07	3.37877e+08	4.44175e+08	4.48178e+07	0.0409911	0.18945	2.14783
M182T46_NEG	4-pyridoxic acid	1921448739	1294753608	4.99971e+08	7.0837e+08	1600434233	6.54414e+08	4.81403e+07	3.81864e+08	1.38303e+08	6.72087e+07	3.59727e+07	3.36327e+08	0.00311551	0.0582321	5.81739
M141T39_NEG	2-mercaptoethanesulfonic acid	1.83766e+08	7.50088e+07	2.52109e+08	5.78557e+08	7.80915e+07	1.04886e+07	5.22506e+06	1.04964e+07	5.68001e+06	9.21765e+06	6.1024e+06	1.14176e+07	0.0492738	0.207546	2.38414
M73T178_NEG	Propionic acid	1018445558	1406819920	2.90519e+08	6.14405e+08	1361091838	3.4733e+08	1.29618e+08	489041829	1.73037e+08	8.27821e+07	1.31765e+08	3.37134e+08	0.0155494	0.121189	4.43832
M275T199_POS	2'-deoxyinosine	1086232760	1.85316e+08	1403307200	7.50618e+08	7.69983e+08	3.71769e+08	1.66184e+07	7.74038e+07	7.76307e+07	4.66032e+08	5.97473e+07	1.31762e+07	0.00825734	0.0906923	4.68731
M252T156_POS	Deoxyadenosine	5.42231e+07	6.67381e+07	3.4827e+08	324425415	6.45634e+07	3.34496e+08	713804	7.56555e+06	9.47653e+06	2.4981e+07	5.04323e+06	4.81836e+06	0.0113932	0.106047	2.54185
M227T113_2_NEG	Ile-Pro	2044042672	1008425631	2114870577	2094067585	2605837888	6.3544e+08	3.65021e+07	1.1293e+08	4.88299e+07	6.62413e+08	6.56206e+07	3.43324e+07	0.000629885	0.0272166	8.03808
M118T297_1_POS	Betaine	7.39825e+07	1.16137e+08	8.99756e+07	8.87479e+07	9.77473e+07	5.65843e+07	1.30205e+08	6.39748e+07	9.60089e+08	5.97755e+08	5.46712e+08	518272119	0.0178225	0.130584	3.46864
M104T301_2_POS	Choline	355622850	8.87963e+08	5.72444e+08	1042934278	6.7035e+08	1574691800	3752368225	3564287282	3572257003	3200733635	3636964426	2039292138	1.54e-05	0.00577527	10.2871
M306T285_NEG	Glutathione	2.43665e+07	1.13458e+07	5.50828e+06	1.04543e+07	2.52252e+07	7.42783e+06	1.62139e+08	4.06264e+07	1.69999e+08	1.23491e+08	1.25393e+08	6.3732e+07	0.000914654	0.0325468	2.04907
M282T100_2_POS	Sphingosine	21377840255	22963593050	10469478718	5139663408	1871945726	1482514227	4.47443e+08	761792696	9.94953e+08	4.07934e+08	8.85536e+08	7.89533e+08	0.0305821	0.165632	15.8715
M565T36_POS	Cer(d18:1/18:1(9Z))	616418419	649740951	4.40552e+08	1.93604e+08	6.21137e+07	6.51825e+07	3.91511e+07	3.75205e+07	5.11784e+07	2.18676e+07	3.36597e+07	3.54911e+07	0.0200182	0.137548	2.87927
M407T245_3_NEG	Cholic acid	8.05891e+07	3.1062e+08	7.37059e+07	3991062412	8.05525e+08	3.78436e+08	14202362091	4125065184	8656253320	6552754283	1621690904	4.93277e+07	0.0483401	0.20596	12.1435
M375T303_NEG	Loganic acid	5.08474e+08	531725429	1150959517	5.83522e+08	2.36057e+08	6.8536e+08	2.81901e+08	3.12841e+08	3.4386e+08	1.518e+08	3.82338e+08	2.72847e+08	0.028722	0.162076	3.06818
M434T104_NEG	Paxilline	2.81158e+08	4.50464e+08	1.21539e+08	3.5695e+08	5.81333e+07	1.6408e+08	1.02797e+08	3.44872e+07	3.19041e+07	2.88133e+07	9.78149e+07	1.09487e+08	0.0222009	0.143812	2.18989
M542T214_POS	Vinblastine	1.07556e+06	5.53234e+06	461817	4.93116e+06	1.04227e+06	1.33508e+06	2.22901e+08	1.18804e+08	1.17512e+08	2.50147e+08	5.95638e+07	2.52373e+07	0.00491329	0.0712224	2.21344
M185T162_NEG	4-chlorophenoxyacetic acid	3.83272e+08	3.36248e+08	6.88214e+07	2.31044e+08	209044794	3.67059e+08	1053917043	5.6482e+08	6.56083e+08	3.634e+08	8.52252e+08	6.74982e+08	0.00277636	0.0553442	4.10823
M182T31_1_NEG	Saccharin	4558430575	3706519068	9.44956e+08	7.01912e+08	3066561088	7.36148e+08	1.5554e+08	1.2797e+08	2.26238e+07	1.54795e+06	6.49956e+06	2.38717e+08	0.0103322	0.101221	8.17371
M179T214_NEG	Acetylsalicylic acid	1.07739e+07	1.03234e+07	9.48601e+06	9.46965e+06	6.13693e+06	3.3752e+07	1.91155e+08	1.65373e+08	1.23509e+08	1.85127e+08	2.01192e+08	7.17969e+07	4.17e-05	0.0075478	2.49221
M502T34_POS	Fexofenadine	1.55722e+06	862905	8.10654e+06	2.11287e+07	4.21192e+06	3.08555e+06	4.14021e+06	1.51e+08	1.86517e+08	3.22808e+08	2.41311e+08	5.8914e+06	0.0192924	0.13546	2.07921
M434T423_2_POS	Fluvastatin	2.05536e+08	6.45629e+08	2.15933e+08	3.39736e+08	6.73135e+08	4.65574e+08	1.81248e+08	1.84178e+08	7.81997e+07	8.03357e+07	2.7699e+08	2.08494e+08	0.0170166	0.127247	2.81801
M391T176_3_NEG	Deoxycholic acid	10120624431	6377225922	3122952179	17219006222	8.64311e+08	8644207157	9.38498e+07	6407847418	1763662717	6.4497e+08	2972598600	301512493	0.0498307	0.208885	13.0387
M413T37_NEG	Naltrindole	5.4641e+08	6.12372e+08	1.25237e+08	2.22696e+08	3.19793e+08	1.63222e+08	5.47321e+07	5.00747e+07	4.06094e+07	3.28107e+07	3.60102e+07	1.40428e+08	0.00932987	0.0964292	2.89221
